# Supplementary material for: Benzylated Dihydroflavones and Isoquinoline-Derived Alkaloids from the Bark of Diclinanona calycina (Annonaceae) and Their Cytotoxicities
Source: MDPI journal article supplement (doi:10.3390/molecules26123714), 2021-06-18
Supplement: s1 [file s1]

# Supplementary Materials

## Benzylated Dihydroflavones and Isoquinoline-Derived Alkaloids from the Bark of *Diclinanona calycina* (Annonaceae) and Their Cytotoxicities

Emmanoel V. Costa <sup>1,\*</sup>, Liviane do N. Soares <sup>1</sup>, Jamal da S. Chaar <sup>1</sup>, Valdenizia R. Silva <sup>2</sup>, Luciano de S. Santos <sup>2</sup>, Hector H. F. Koolen <sup>3</sup>, Felipe M. A. da Silva <sup>1</sup>, Josean F. Tavares <sup>4</sup>, Gokhan Zengin <sup>5</sup>, Milena B. P. Soares <sup>2</sup> and Daniel P. Bezerra <sup>2,\*</sup>

<sup>1</sup> Department of Chemistry, Federal University of Amazonas (UFAM), Manaus 69080-900, AM, Brazil; evc@ufam.edu.br (E.V.C.); BeM.Liviane@gmail.com (L.d.N.S.); jchaar@ufam.edu.br (J.d.S.C.); felipemourams@gmail.com (F.M.A.d.S.)

<sup>2</sup> Gonçalo Moniz Institute, Oswaldo Cruz Foundation (IGM-FIOCRUZ/BA), Salvador 40296-710, BA, Brazil; valdeniziar@gmail.com (V.R.S.); luciano.biomed@gmail.com (L.d.S.S.); milenabpsoares@gmail.com (M.B.P.S.); daniel.bezerra@fiocruz.br (D.P.B.)

<sup>3</sup> Metabolomics and Mass Spectrometry Research Group, Amazonas State University (UEA), Manaus 690065-130, AM, Brazil; hkoolen@uea.edu.br

<sup>4</sup> Health Sciences Center, Postgraduate Program in Natural and Synthetic Bioactive Products, Federal University of Paraíba (UFPB), João Pessoa 58051-970, PA, Brazil; josean@ltf.ufpb.br

<sup>5</sup> Department of Biology, Science Faculty, Selcuk University, Konya 42130, Turkey; gokhanzengin@selcuk.edu.tr

\* Correspondence: evc@ufam.edu.br (E.V.C.); daniel.bezerra@fiocruz.br (D.P.B.); Tel./Fax: +55-92-3305-1181 Ramal 2870 (E.V.C.); +55-71-3176-2272 (D.P.B.)

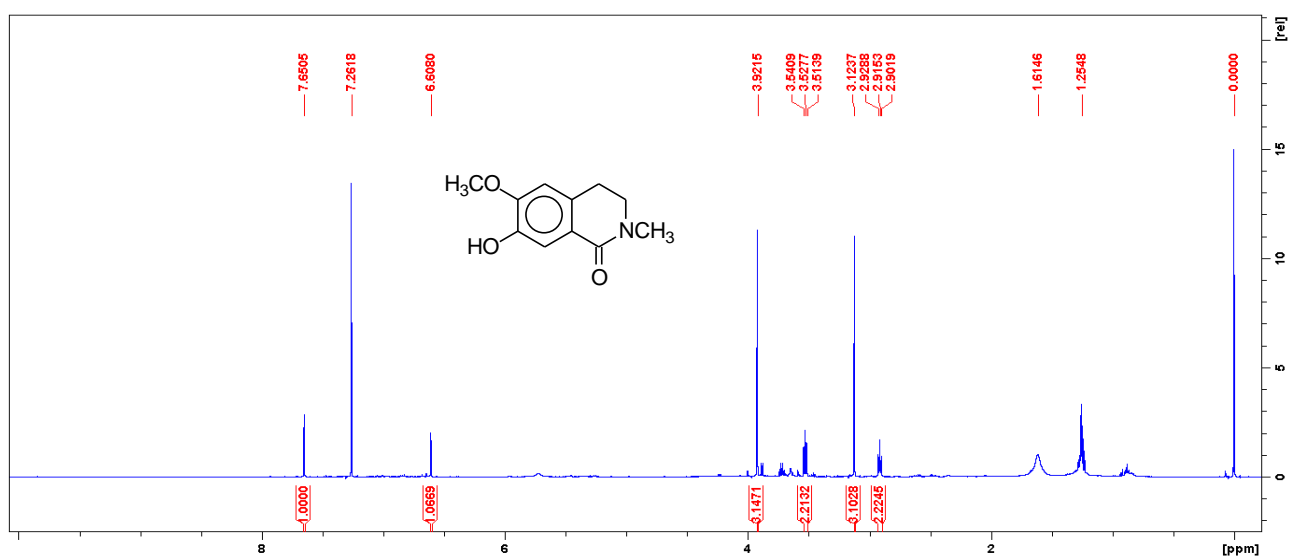

Figure S1. <sup>1</sup>H NMR spectrum of *thalifoline* (**1**) in CDCl<sub>3</sub> at 500 MHz.

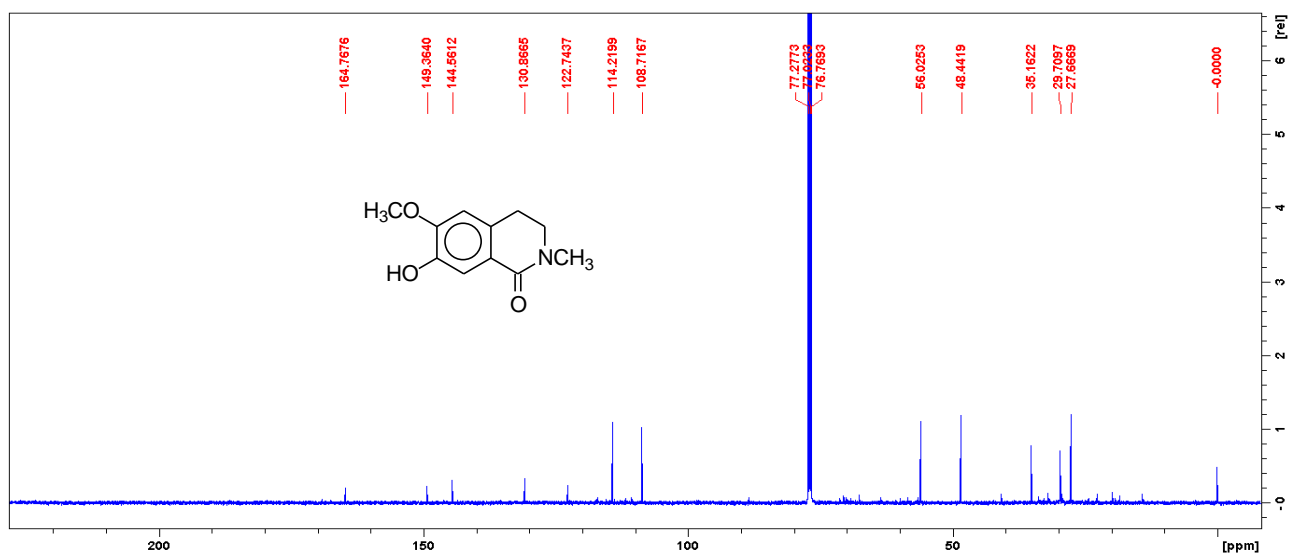

Figure S2. <sup>13</sup>C NMR spectrum of *thalifoline* (**1**) in CDCl<sub>3</sub> at 100 MHz.

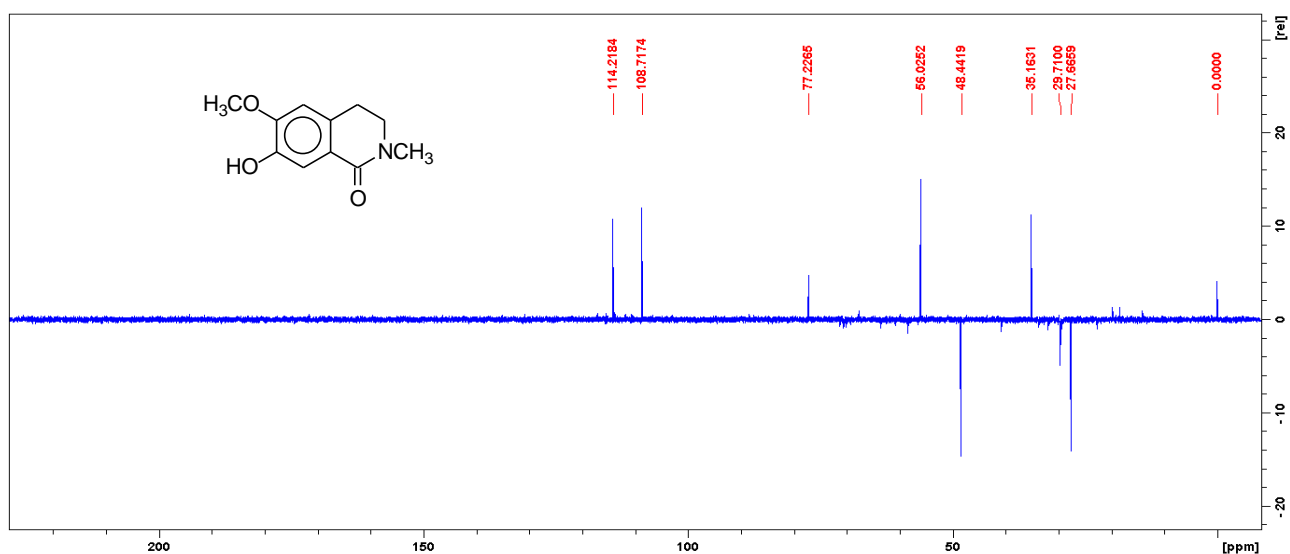

Figure S3. DEPT 135 spectrum of *thalifoline* (**1**) in CDCl<sub>3</sub> at 125 MHz.

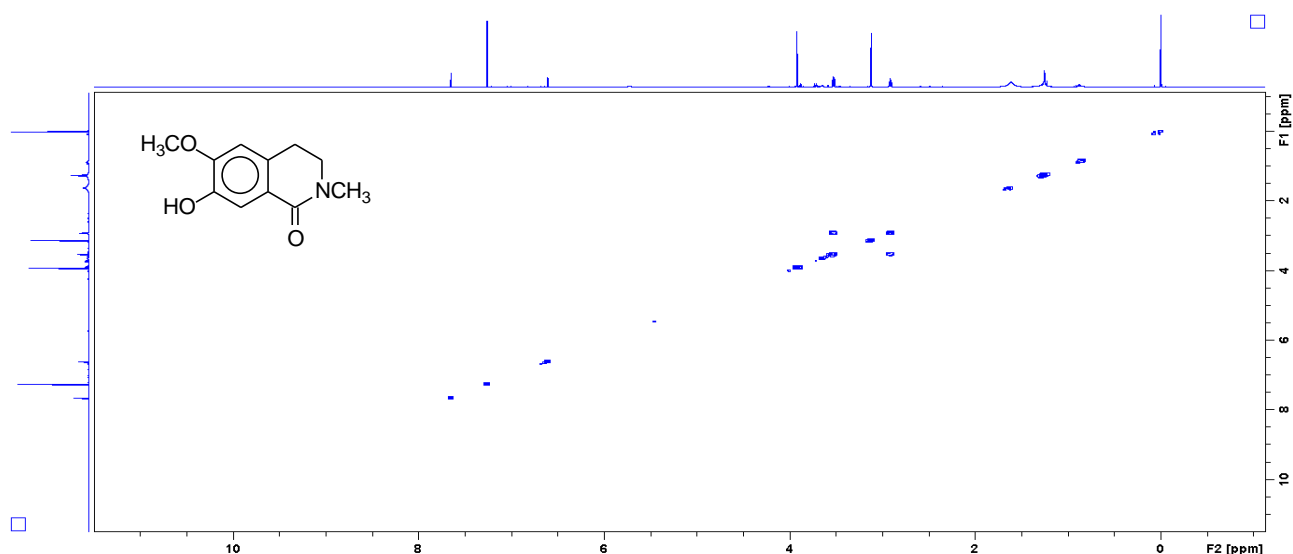

**Figure S4.**  $^1\text{H}$ - $^1\text{H}$  correlation map from COSY NMR experiment of *thalifoline* (**1**) in  $\text{CDCl}_3$  at 500 MHz.

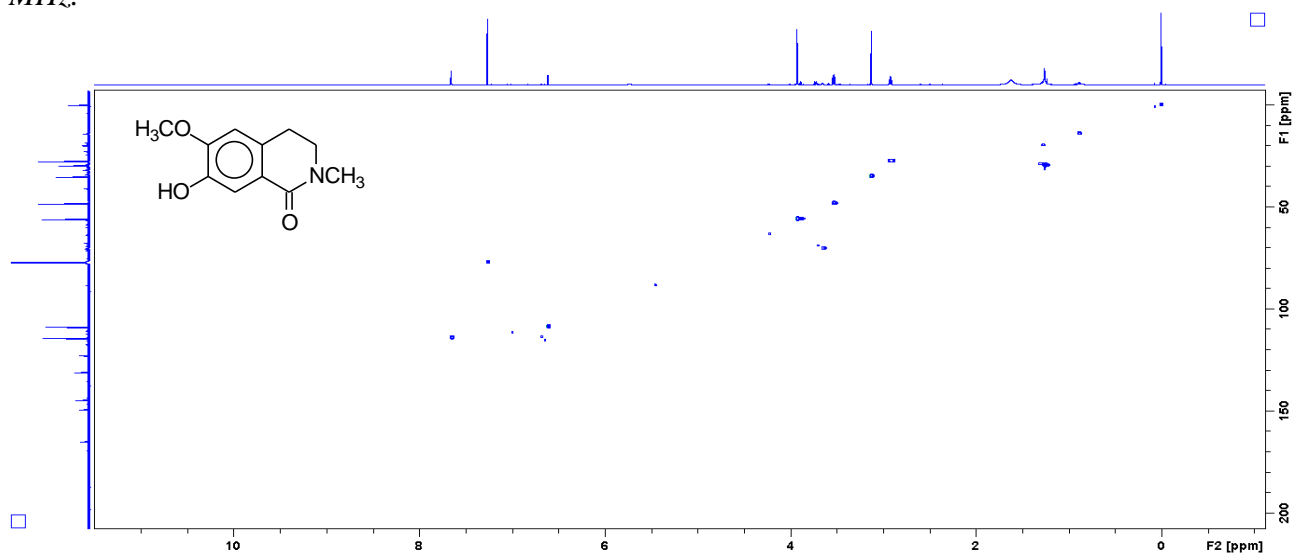

**Figure S5.** One-bond  $^1\text{H}$ - $^{13}\text{C}$  correlation map from HSQC NMR experiment of *thalifoline* (**1**) in  $\text{CDCl}_3$  at 500 ( $^1\text{H}$ ) and 125 MHz ( $^{13}\text{C}$ ), respectively.



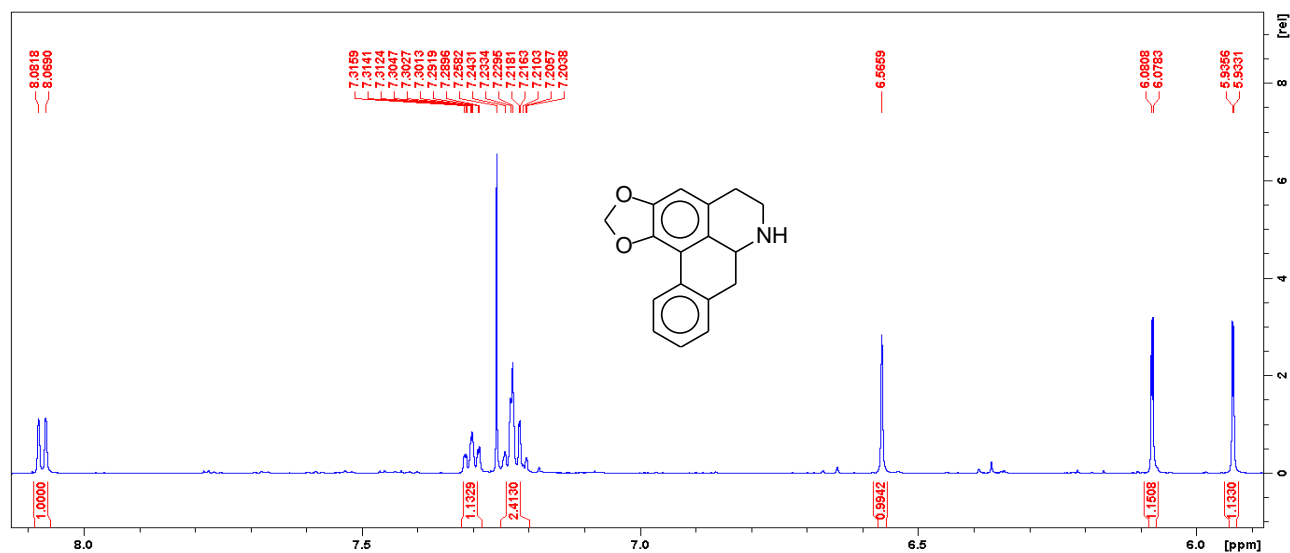

Figure S9. Expansion ( $\delta$  8.12 – 5.88) of the  $^1\text{H}$  NMR spectrum of anonaine (2) in  $\text{CDCl}_3$  at 600 MHz.

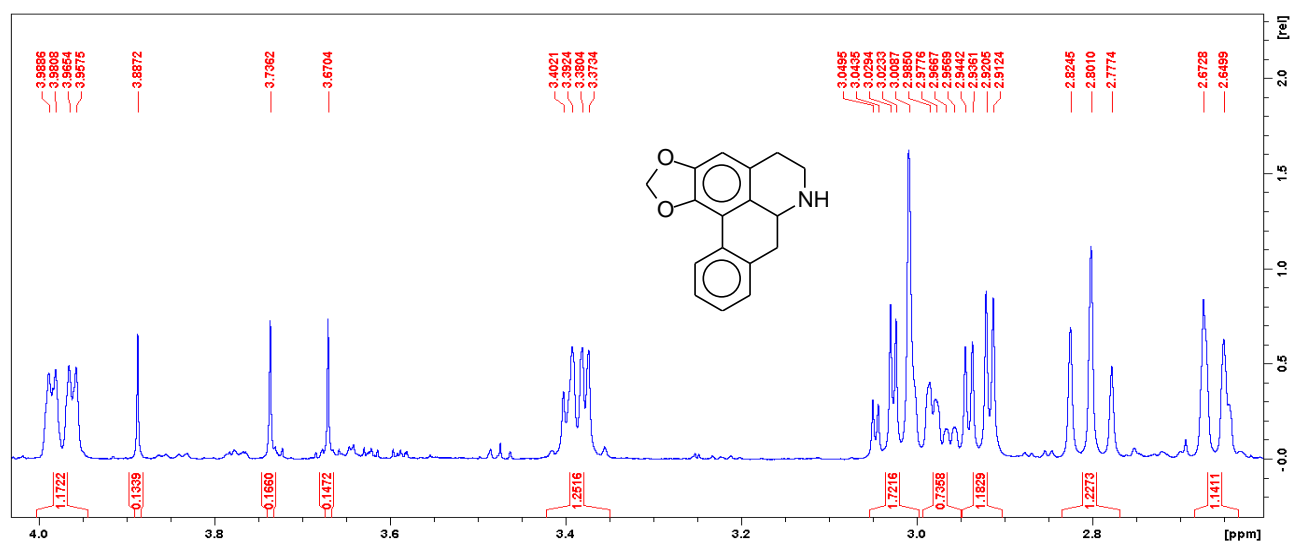

Figure S10. Expansion ( $\delta$  4.02 – 2.61) of the  $^1\text{H}$  NMR spectrum of anonaine (2) in  $\text{CDCl}_3$  at 600 MHz.

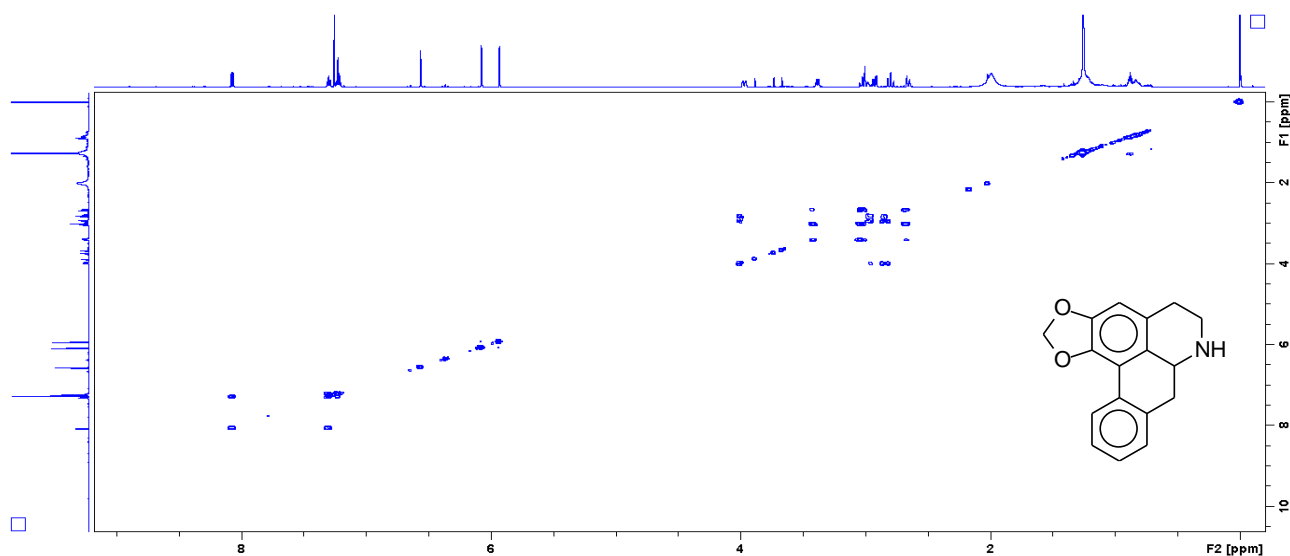

Figure S11.  $^1\text{H}$ - $^1\text{H}$  correlation map from COSY NMR experiment of anonaine (2) in  $\text{CDCl}_3$  at 600 MHz.

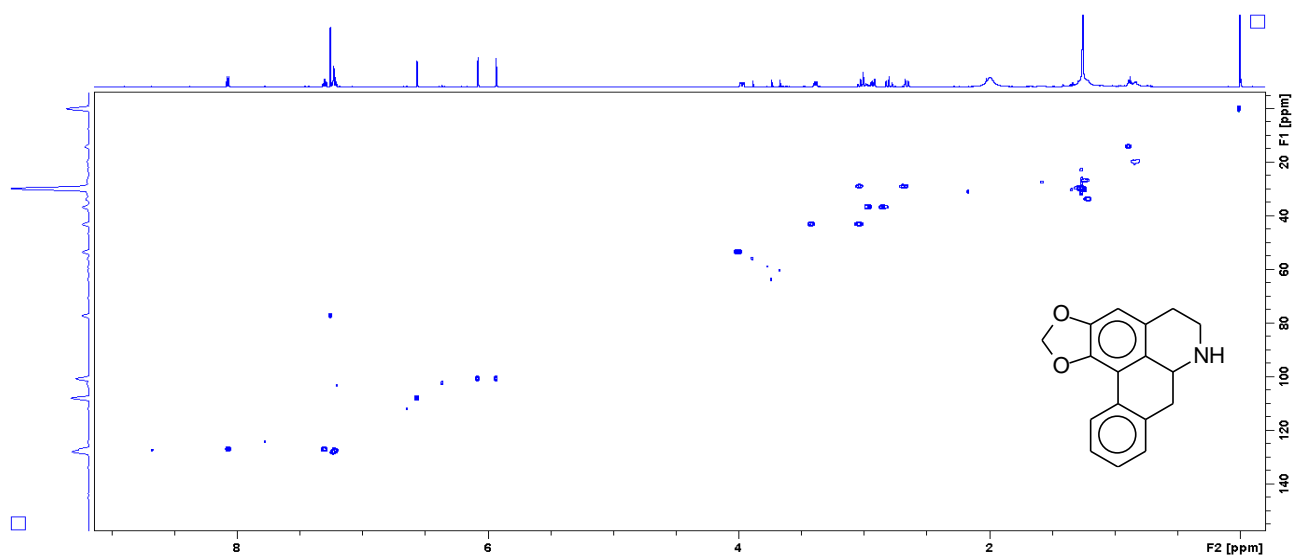

**Figure S12.** One-bond  $^1\text{H}$ - $^{13}\text{C}$  correlation map from HSQC NMR experiment of **anonaine (2)** in  $\text{CDCl}_3$  at 600 ( $^1\text{H}$ ) and 150 MHz ( $^{13}\text{C}$ ), respectively.

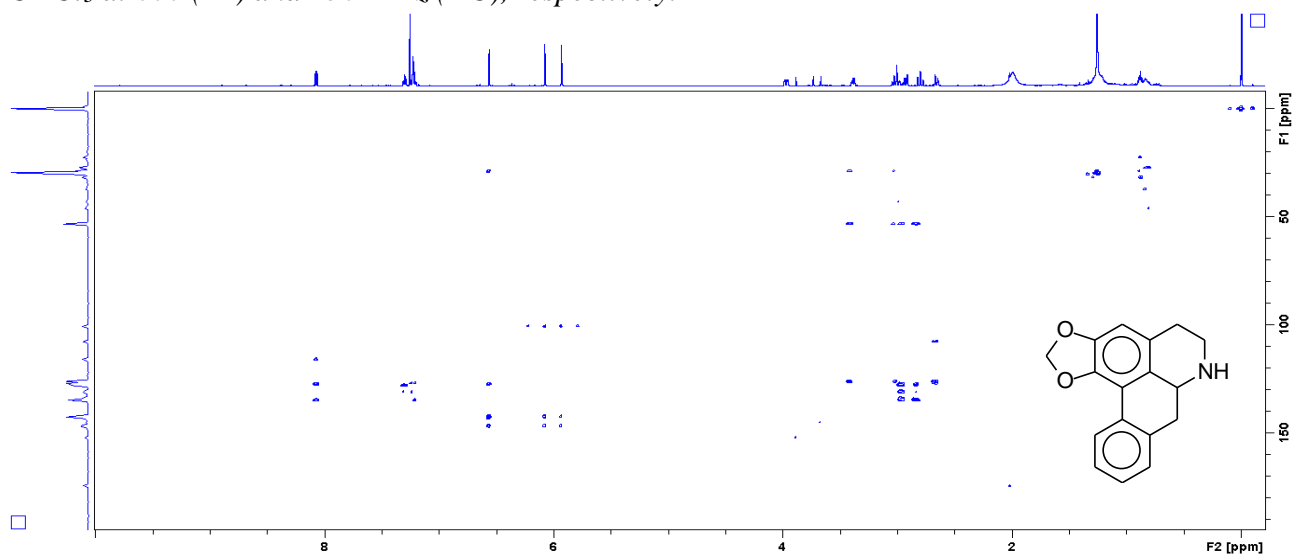

**Figure S13.** Long-range  $^1\text{H}$ - $^{13}\text{C}$  correlation map from HMBC NMR experiment of **anonaine (2)** in  $\text{CDCl}_3$  at 600 ( $^1\text{H}$ ) and 150 MHz ( $^{13}\text{C}$ ), respectively.

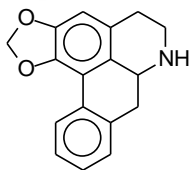

**Figure S14.** LR-ESI(+)-MS spectrum of anonaine (**2**) ( $m/z$  266  $[M+H]^+$ ).

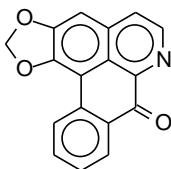

**Figure S15.**  $^1\text{H}$  NMR spectrum of **liriodenine** (**3**) in  $\text{CDCl}_3$  plus drop of  $\text{CD}_3\text{OD}$  at 600 MHz.

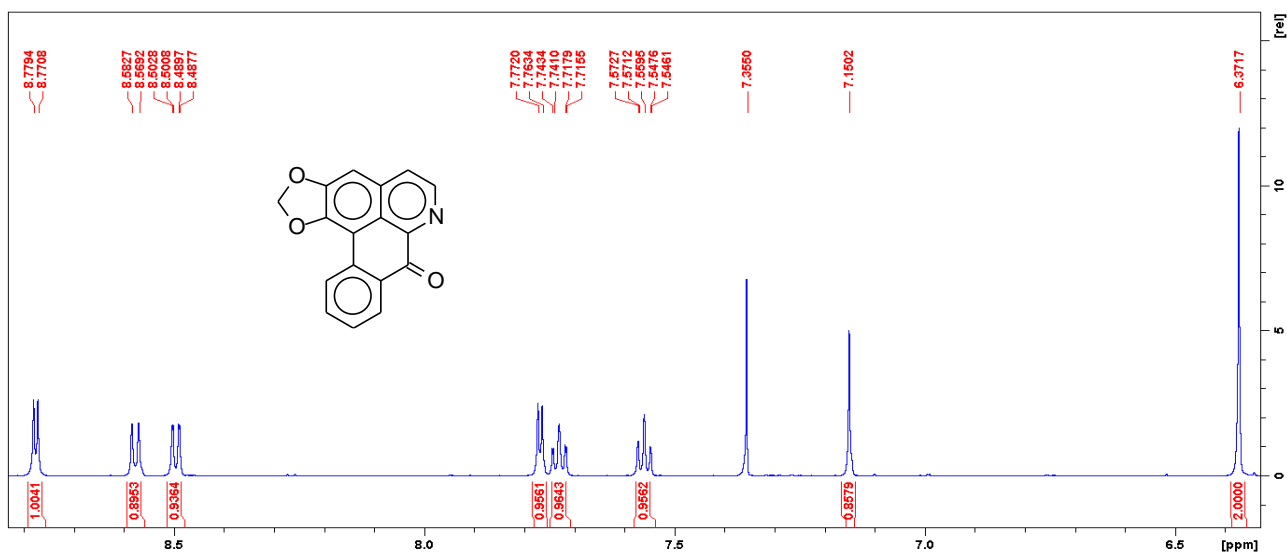

**Figure S16.** Expansion ( $\delta$  8.82 – 6.33) of the  $^1\text{H}$  NMR spectrum of **liriodenine** (**3**) in  $\text{CDCl}_3$  plus drop of  $\text{CD}_3\text{OD}$  at 600 MHz.

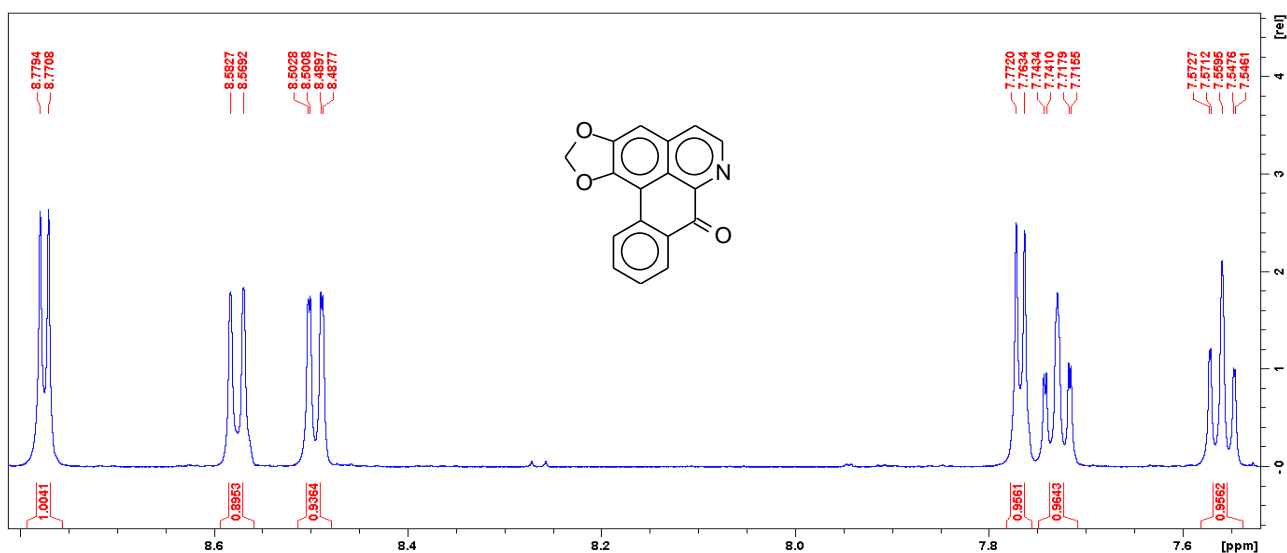

**Figure S17.** Expansion ( $\delta$  8.81 – 7.52) of the  $^1\text{H}$  NMR spectrum of **liriodenine** (**3**) in  $\text{CDCl}_3$  plus drop of  $\text{CD}_3\text{OD}$  at 600 MHz.

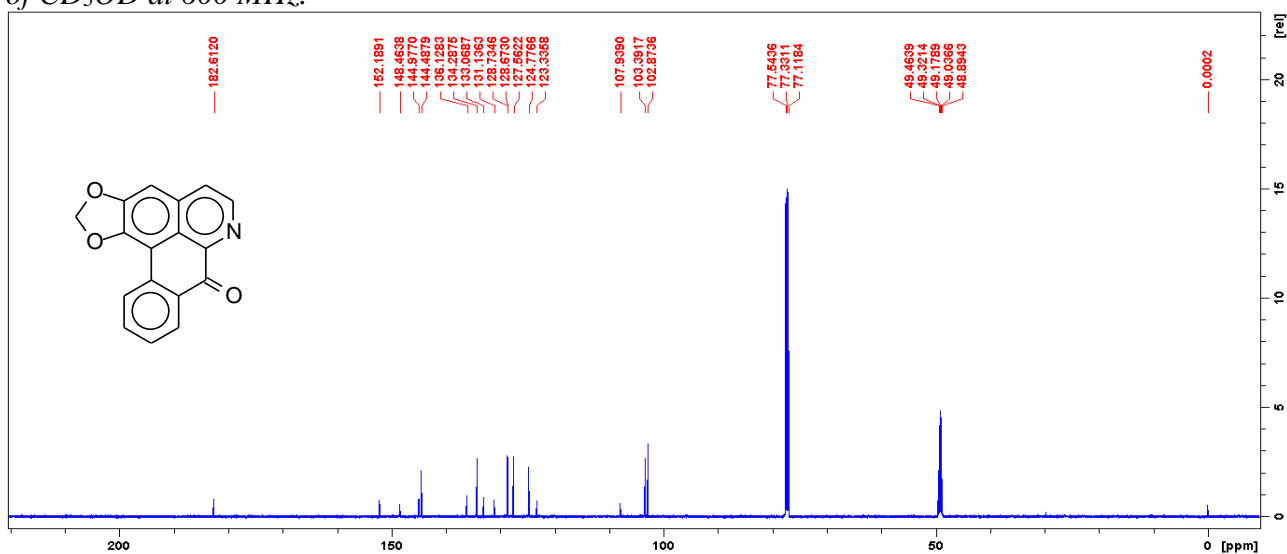

**Figure S18.**  $^{13}\text{C}$  NMR spectrum of **liriodenine** (**3**) in  $\text{CDCl}_3$  plus drop of  $\text{CD}_3\text{OD}$  at 150 MHz.



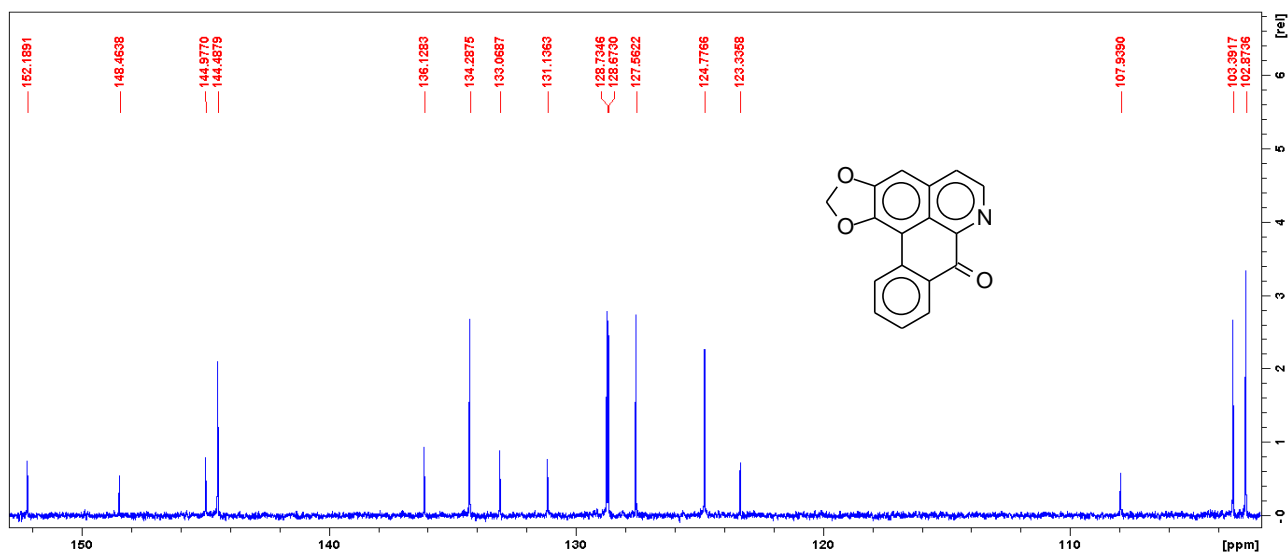

**Figure S19.** Expansion ( $\delta$  152.1 – 102.4) of the  $^{13}\text{C}$  NMR spectrum of **liriodenine** (3) in  $\text{CDCl}_3$  plus drop of  $\text{CD}_3\text{OD}$  at 150 MHz.

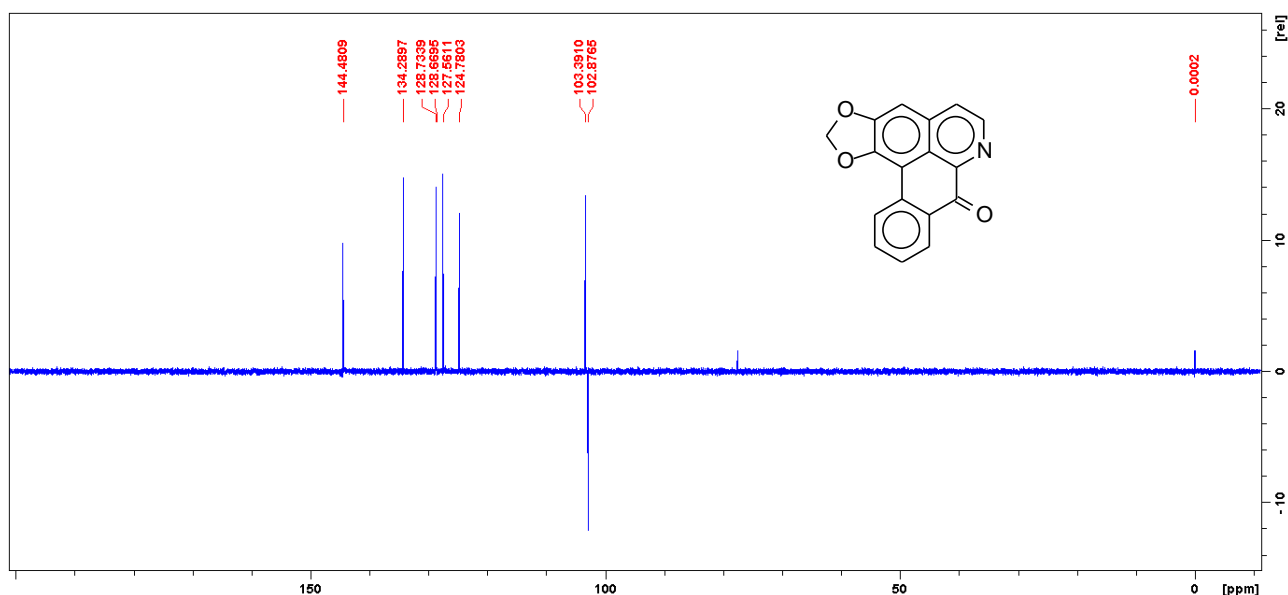

**Figure S20.** DEPT 135 spectrum of **liriodenine** (3) in  $\text{CDCl}_3$  plus drop of  $\text{CD}_3\text{OD}$  at 150 MHz.

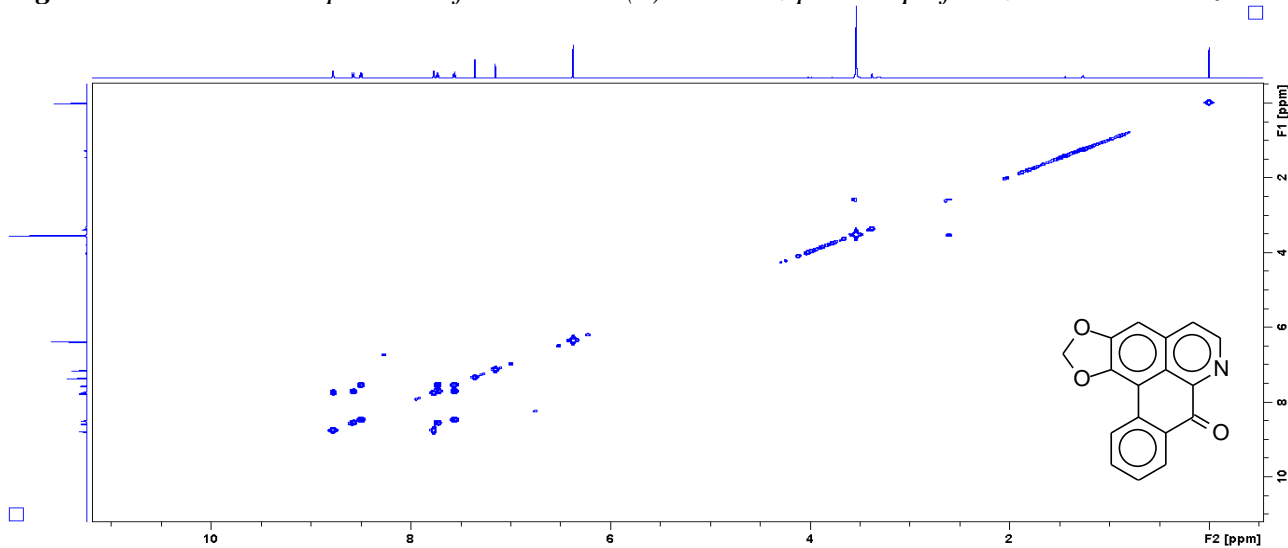

**Figure S21.**  $^1\text{H}$ - $^1\text{H}$  correlation map from COSY NMR experiment of **liriodenine** (3) in  $\text{CDCl}_3$  plus drop of  $\text{CD}_3\text{OD}$  at 600 MHz.

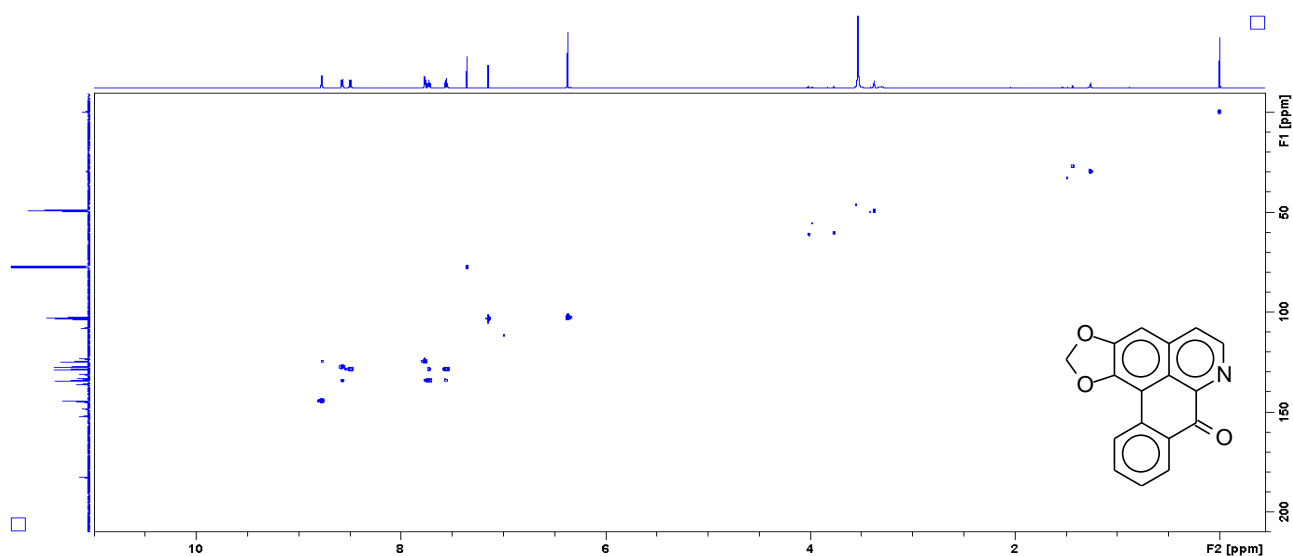

**Figure S22.** One-bond  $^1\text{H}$ - $^{13}\text{C}$  correlation map from HSQC NMR experiment of **liriodenine (3)** in  $\text{CDCl}_3$  plus drop of  $\text{CD}_3\text{OD}$  at 600 ( $^1\text{H}$ ) and 150 MHz ( $^{13}\text{C}$ ), respectively.

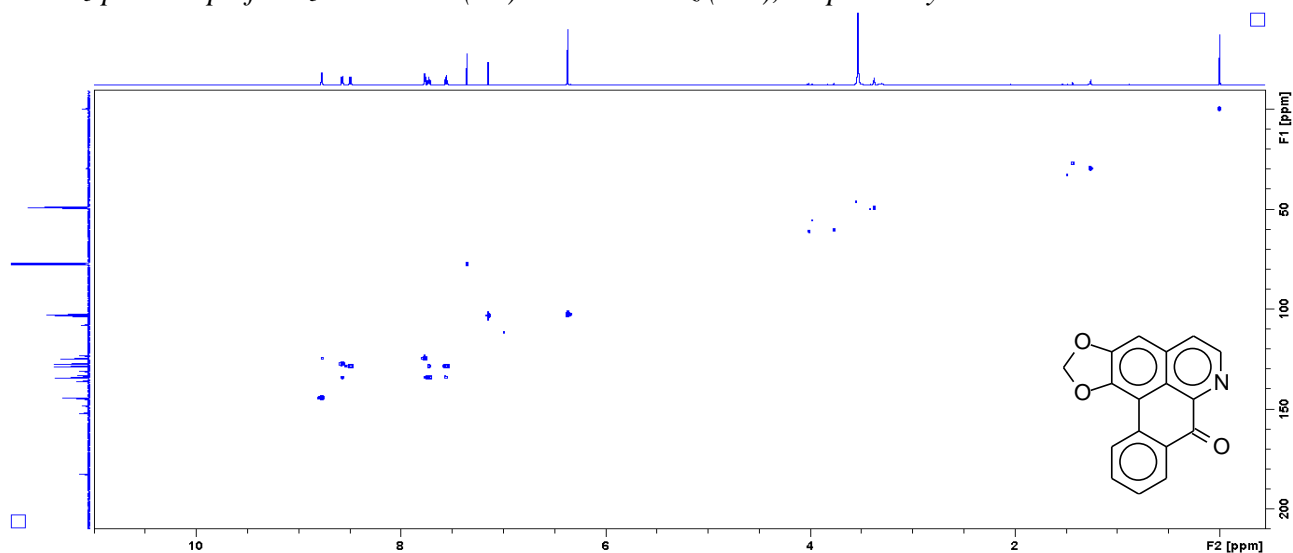

**Figure S23.** Long-range  $^1\text{H}$ - $^{13}\text{C}$  correlation map from HMBC NMR experiment of **liriodenine (3)** in  $\text{CDCl}_3$  plus drop of  $\text{CD}_3\text{OD}$  at 600 ( $^1\text{H}$ ) and 150 MHz ( $^{13}\text{C}$ ), respectively.

padres\_posi\_esi #243 RT: 3,31 AV: 1 NL: 3,41E4  
T: ITMS + c ESI Full ms [100,00-1000,00]

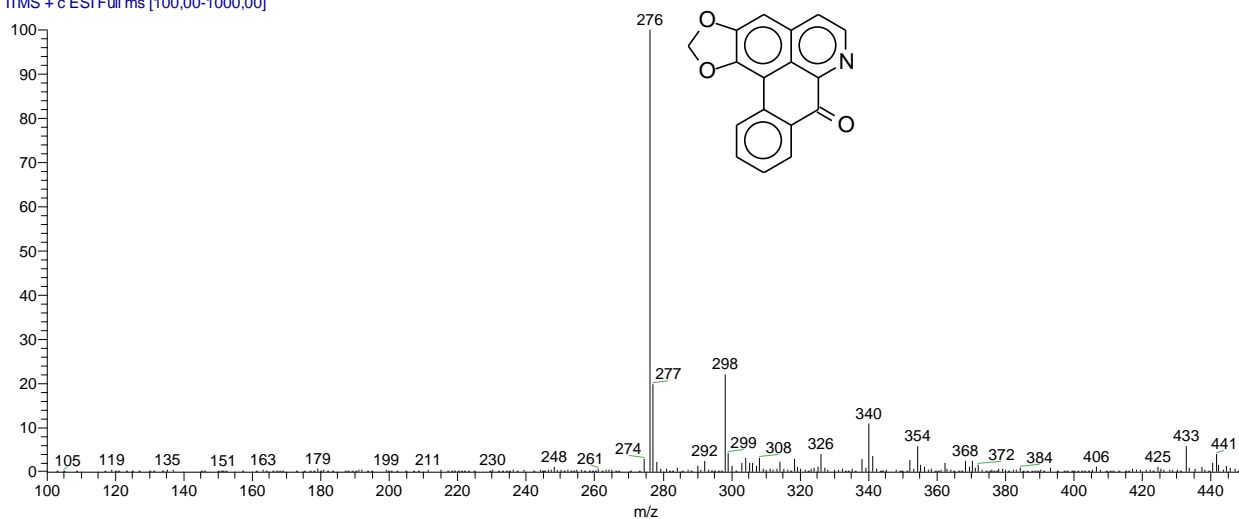

**Figure S24.** LR-ESI(+)-MS spectrum of **liriodenine (3)** ( $m/z$  276 [ $M+H$ ] $^+$ ).

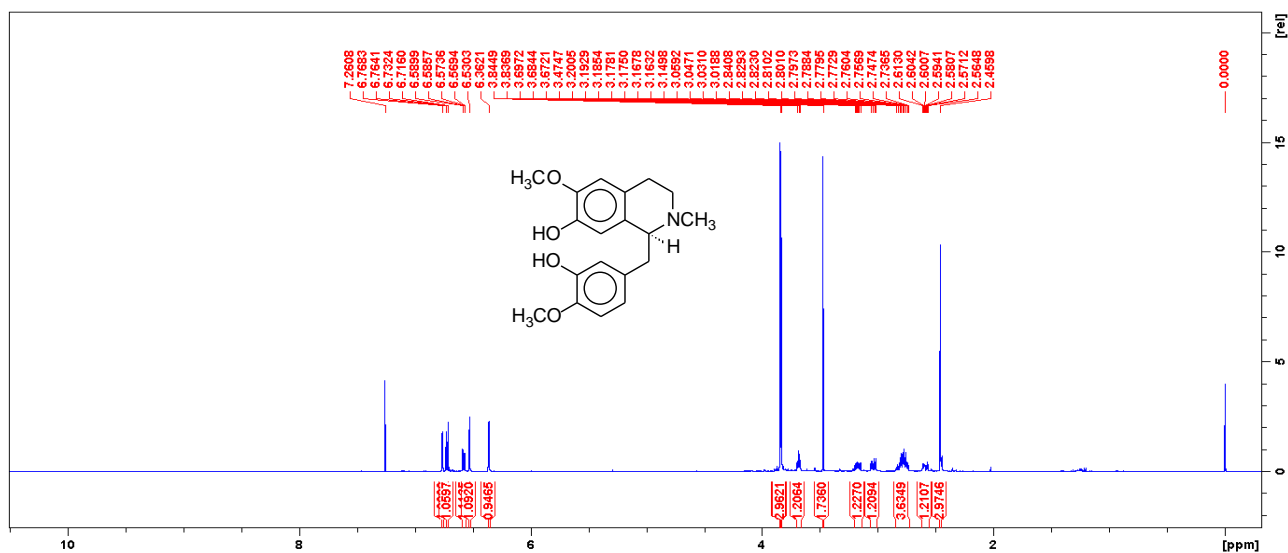

Figure S25.  $^1\text{H}$  NMR spectrum of reticuline (4) in  $\text{CDCl}_3$  at 500 MHz.

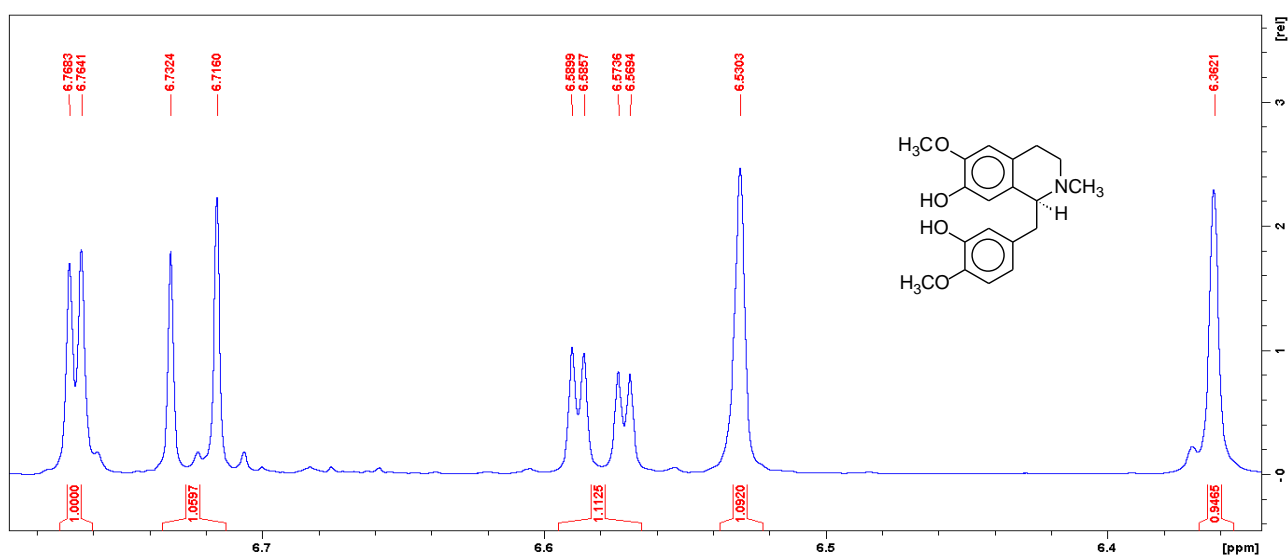

Figure S26. Expansion ( $\delta$  6.78 – 6.34) of the  $^1\text{H}$  NMR spectrum of reticuline (4) in  $\text{CDCl}_3$  at 500 MHz.

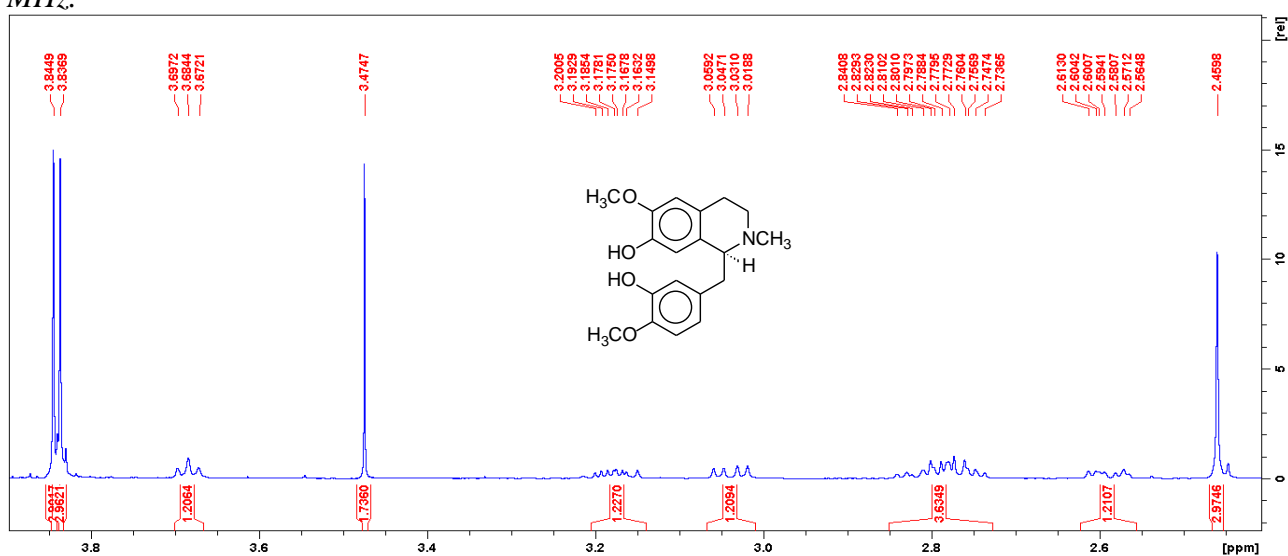

Figure S27. Expansion ( $\delta$  3.88 – 2.41) of the  $^1\text{H}$  NMR spectrum of reticuline (4) in  $\text{CDCl}_3$  at 500 MHz.

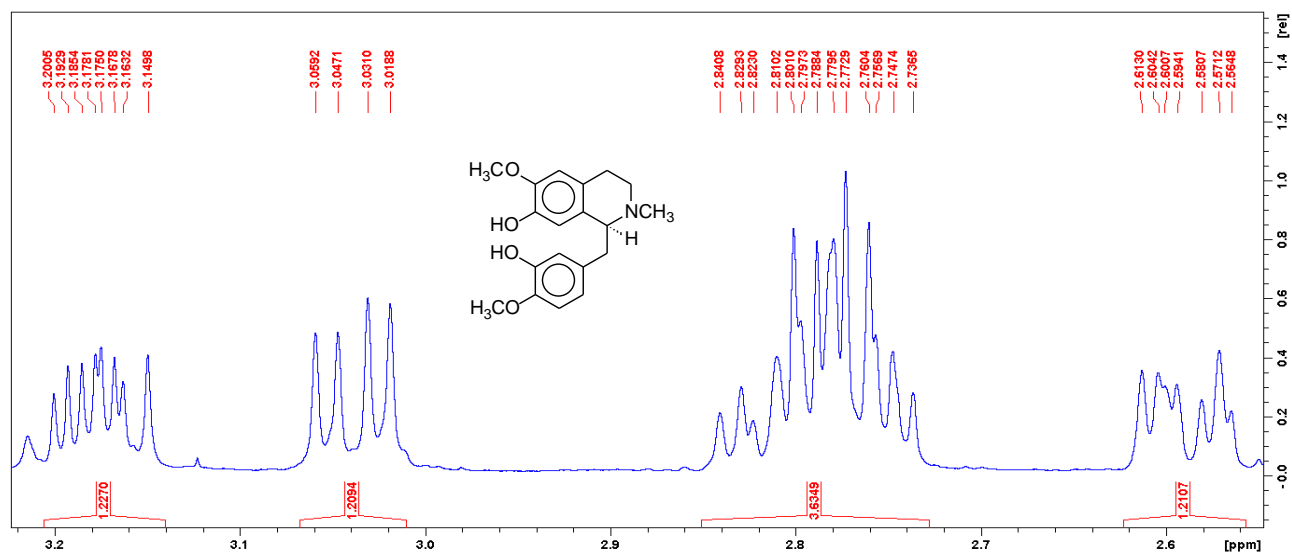

**Figure S28.** Expansion ( $\delta$  3.22 – 2.55) of the  $^1\text{H}$  NMR spectrum of *reticuline* (4) in  $\text{CDCl}_3$  at 500 MHz.

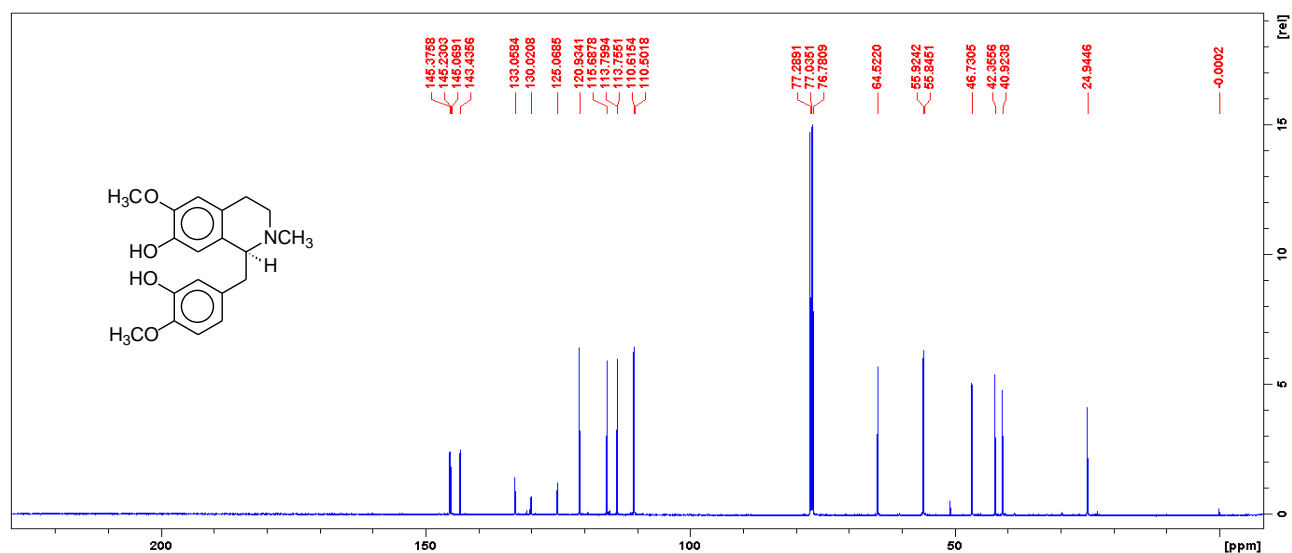

**Figure S29.**  $^{13}\text{C}$  NMR spectrum of *reticuline* (4) in  $\text{CDCl}_3$  at 125 MHz.

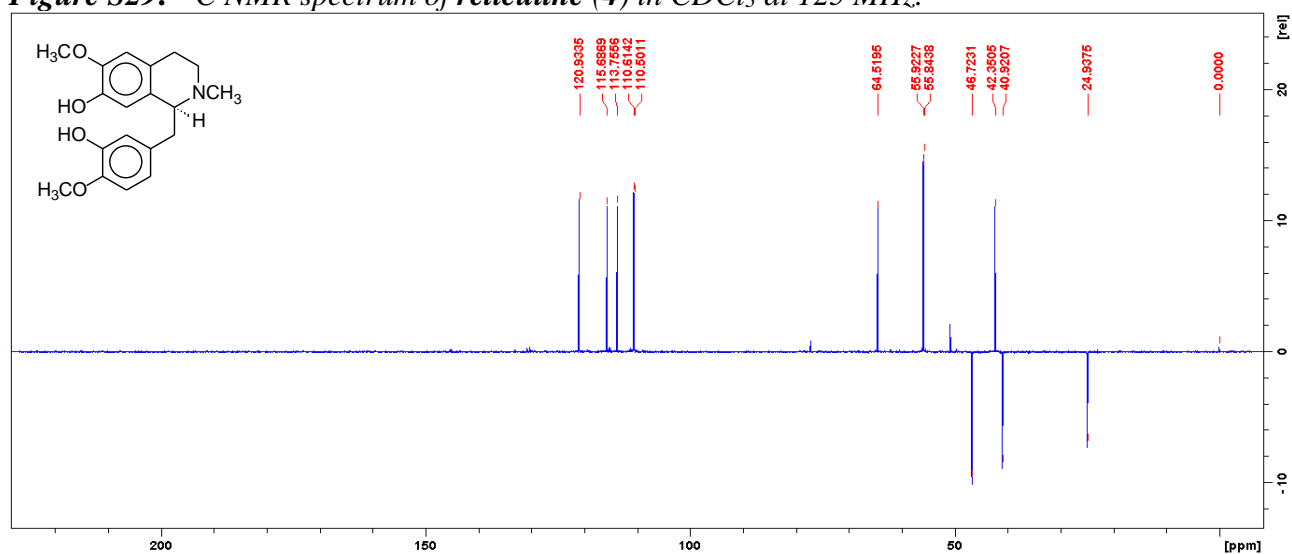

**Figure S30.** DEPT 135 spectrum of *reticuline* (4) in  $\text{CDCl}_3$  at 125 MHz.

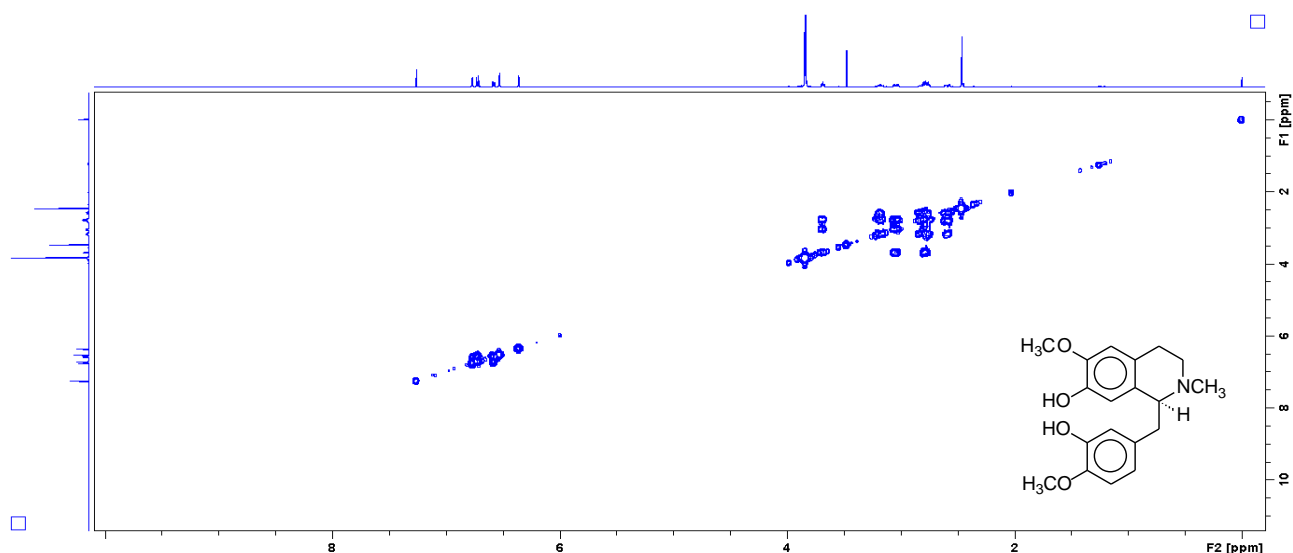

**Figure S31.**  $^1\text{H}$ - $^1\text{H}$  correlation map from COSY NMR experiment of **reticuline (4)** in  $\text{CDCl}_3$  at 500 MHz.

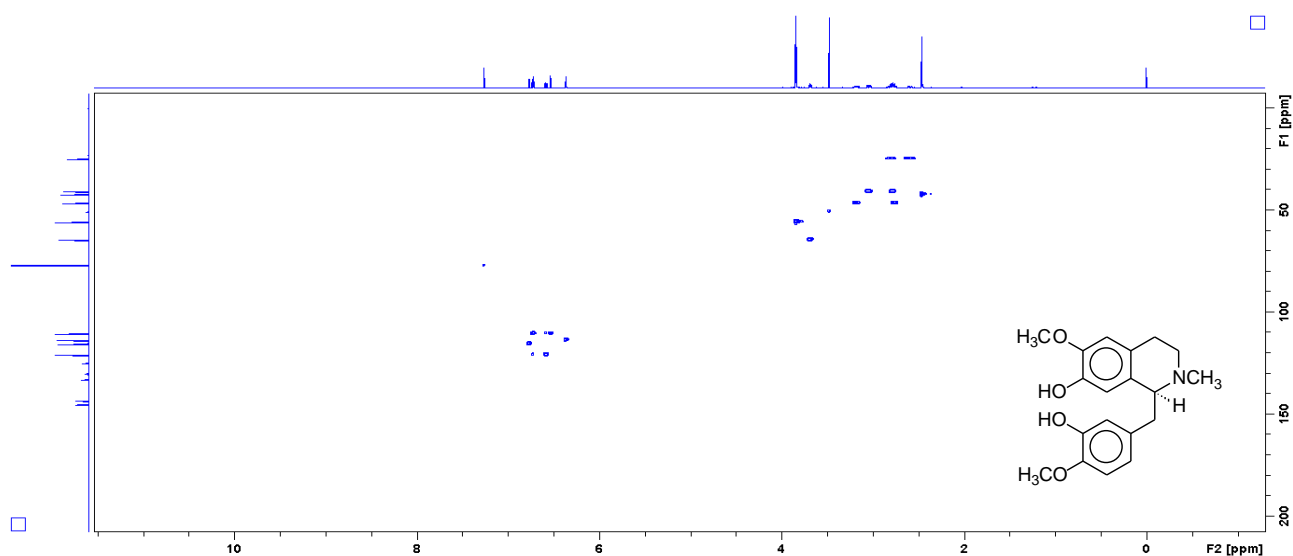

**Figure S32.** One-bond  $^1\text{H}$ - $^{13}\text{C}$  correlation map from HSQC NMR experiment of **reticuline (4)** in  $\text{CDCl}_3$  at 500 ( $^1\text{H}$ ) and 125 MHz ( $^{13}\text{C}$ ), respectively.

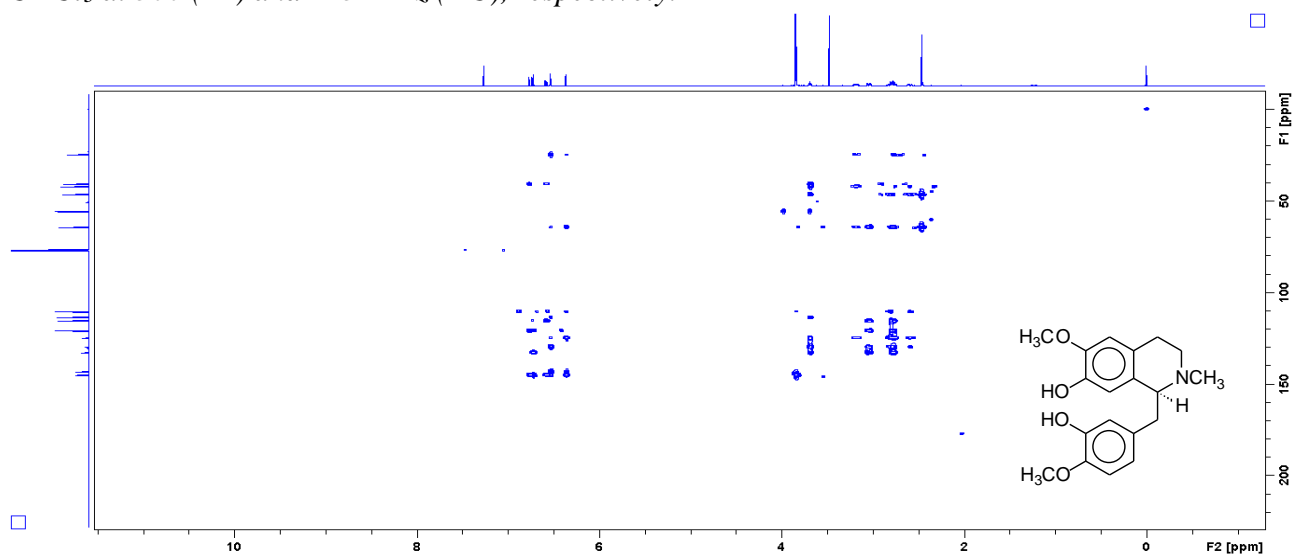

**Figure S33.** Long-range  $^1\text{H}$ - $^{13}\text{C}$  correlation map from HMBC NMR experiment of **reticuline (4)** in  $\text{CDCl}_3$  at 500 ( $^1\text{H}$ ) and 125 MHz ( $^{13}\text{C}$ ), respectively.

padroes\_posi\_esi #1031 RT: 14,32 AV: 1 NL: 8,07E4  
T: FTMS + c ESI Full ms [100,00-1000,00]

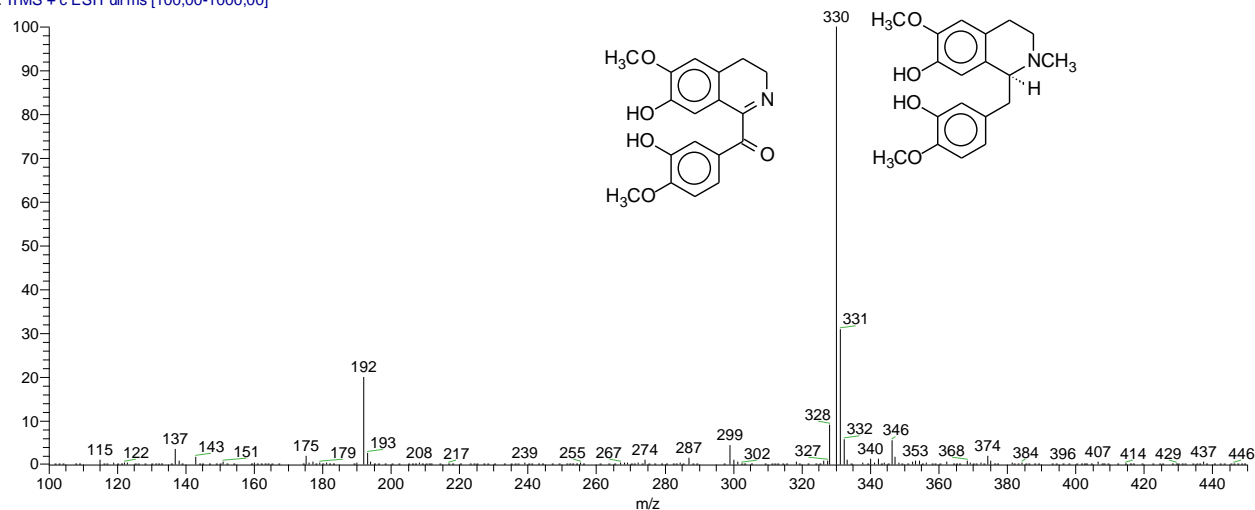

**Figure S34.** LR-ESI(+)-MS spectrum of *reticuline* (**4**) ( $m/z$  330  $[M+H]^+$ ).

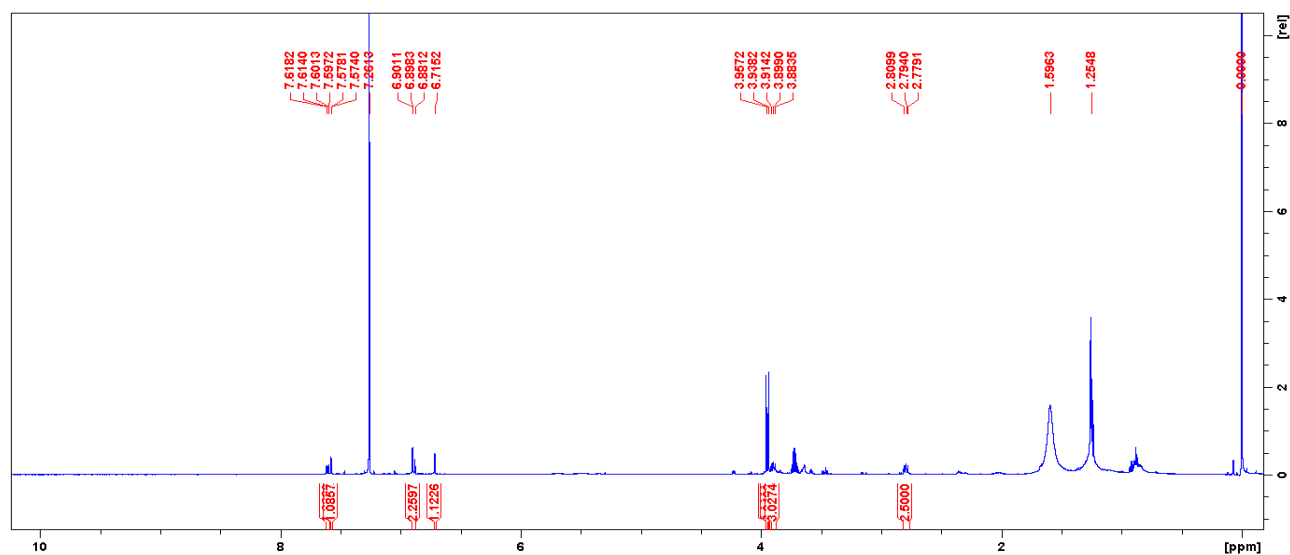

**Figure S35.**  $^1\text{H}$  NMR spectrum of *dehydro-oxonorreticuline* (**5**) in  $\text{CDCl}_3$  at 500 MHz.

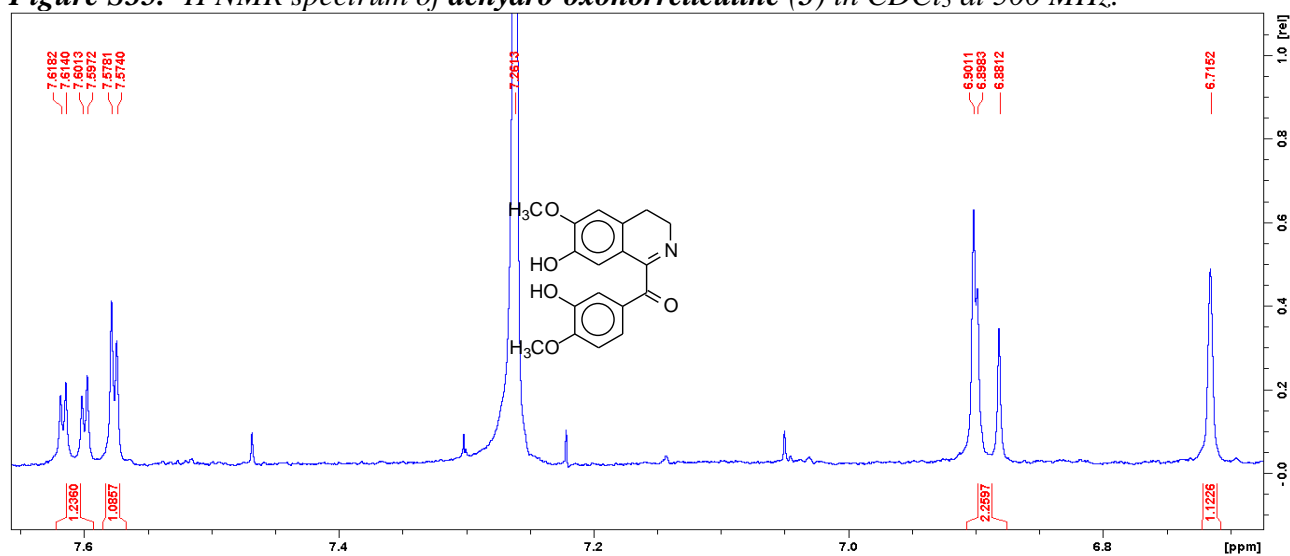

**Figure S36.** Expansion ( $\delta$  7,65 – 6,68) of the  $^1\text{H}$  NMR spectrum of *dehydro-oxonorreticuline* (**5**) in  $\text{CDCl}_3$  at 500 MHz.

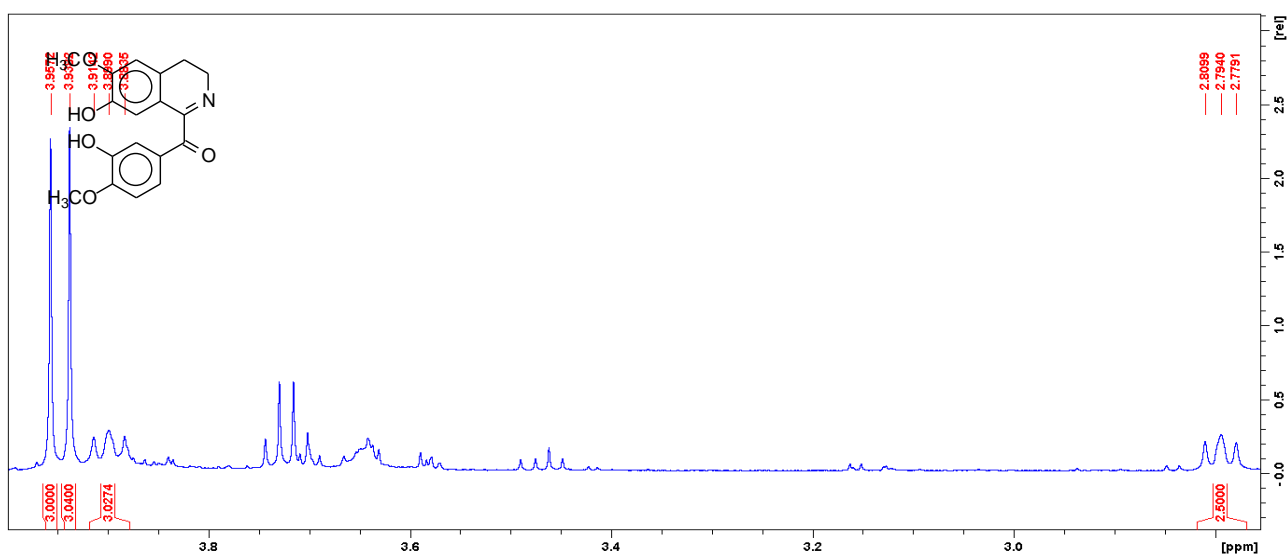

**Figure S37.** Expansion ( $\delta$  3.99 – 2.76) of the <sup>1</sup>H NMR spectrum of *dehydro-oxonorreticuline* (5) in CDCl<sub>3</sub> at 500 MHz.

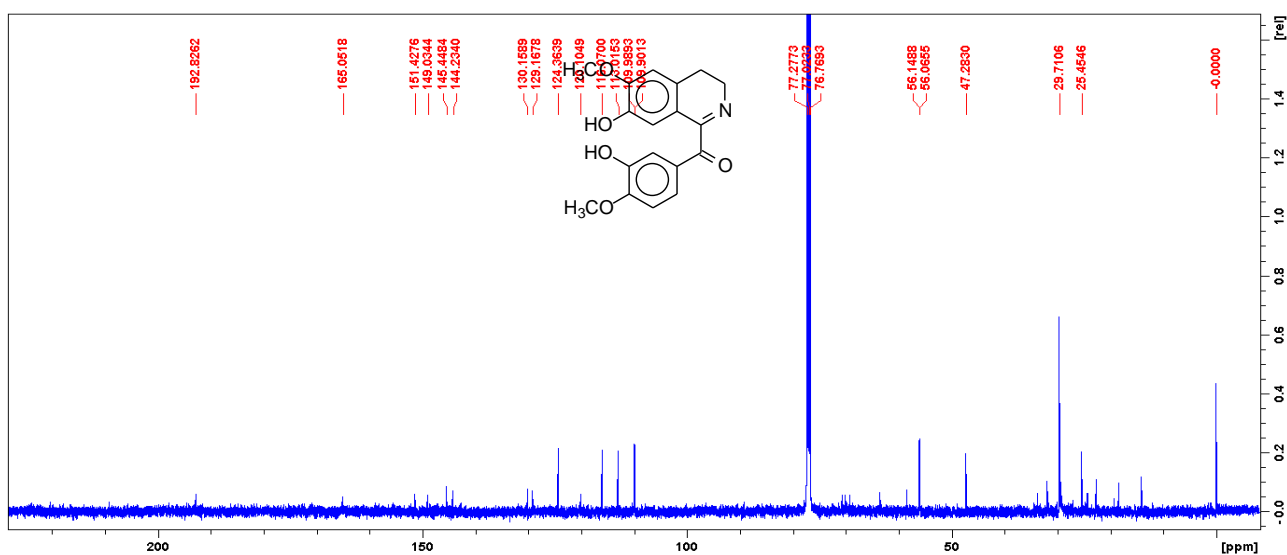

**Figure S38.** <sup>13</sup>C NMR spectrum of *dehydro-oxonorreticuline* (5) in CDCl<sub>3</sub> at 125 MHz.

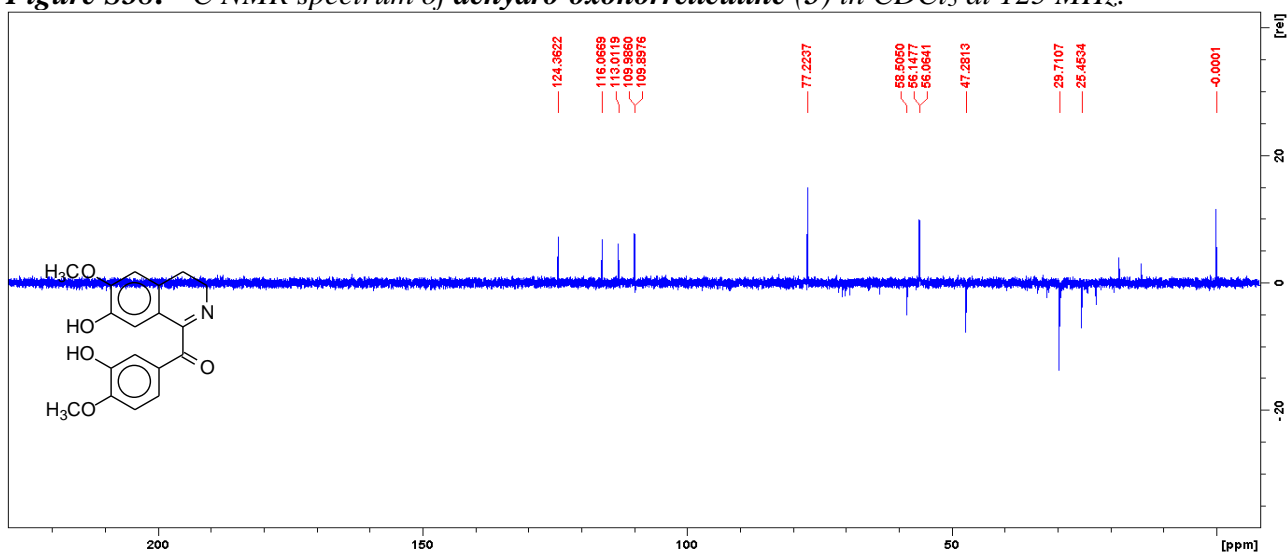

**Figure S39.** DEPT 135 spectrum of *dehydro-oxonorreticuline* (5) in CDCl<sub>3</sub> at 125 MHz.

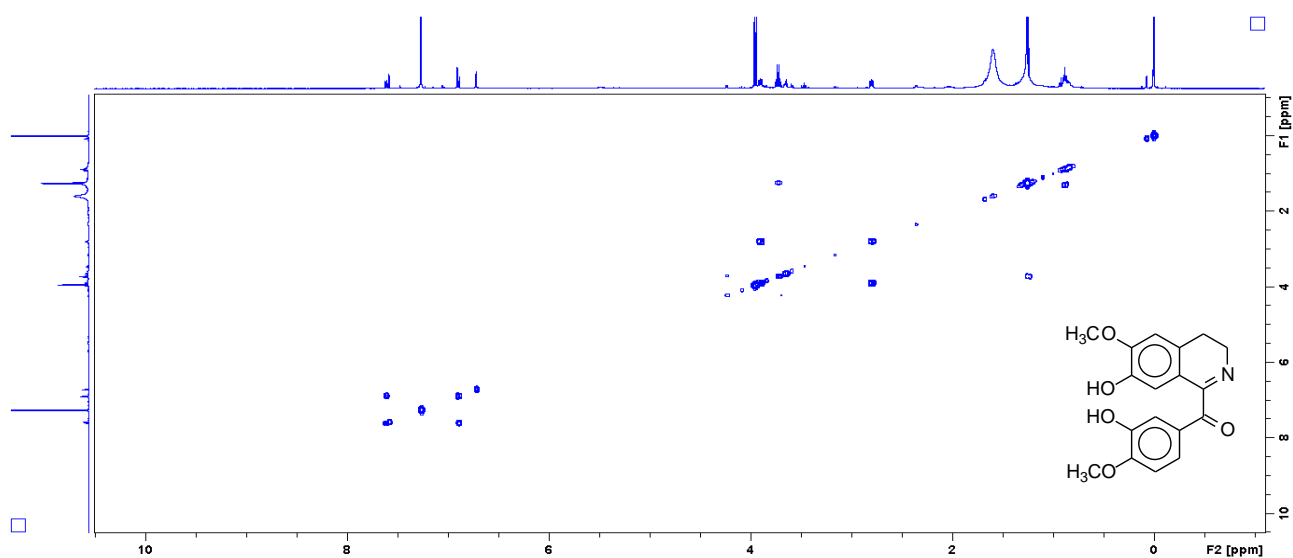

**Figure S40.**  $^1\text{H}$ - $^1\text{H}$  correlation map from COSY NMR experiment of *dehydro-oxonorreticuline* (**5**) in  $\text{CDCl}_3$  at 500 MHz.

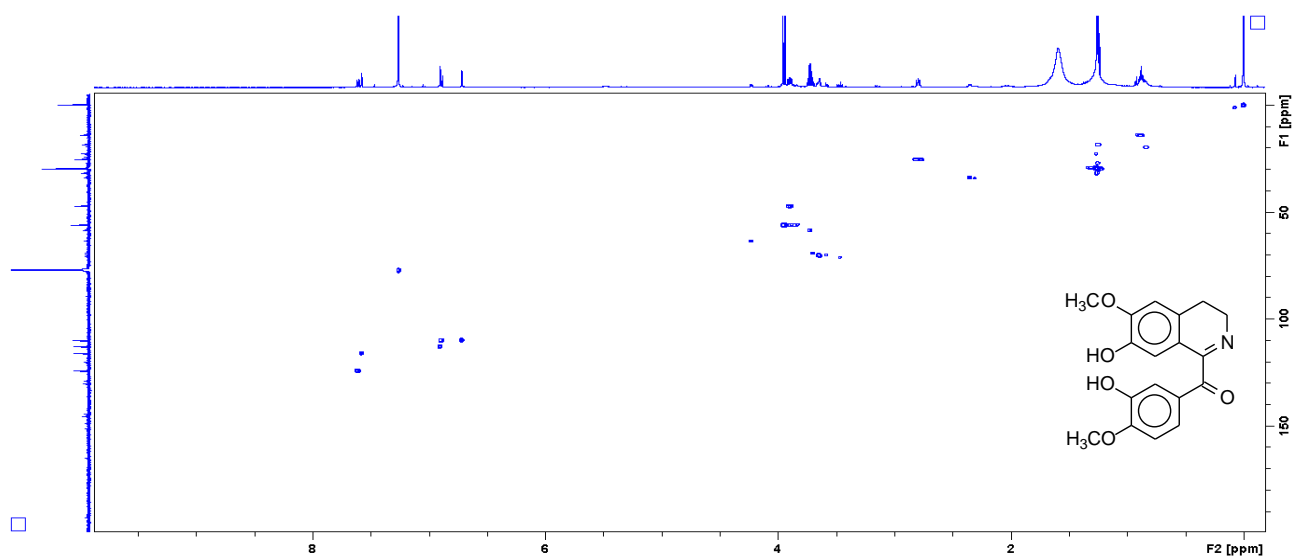

**Figure S41.** One-bond  $^1\text{H}$ - $^{13}\text{C}$  correlation map from HSQC NMR experiment of *dehydro-oxonorreticuline* (**5**) in  $\text{CDCl}_3$  at 500 ( $^1\text{H}$ ) and 125 MHz ( $^{13}\text{C}$ ), respectively.

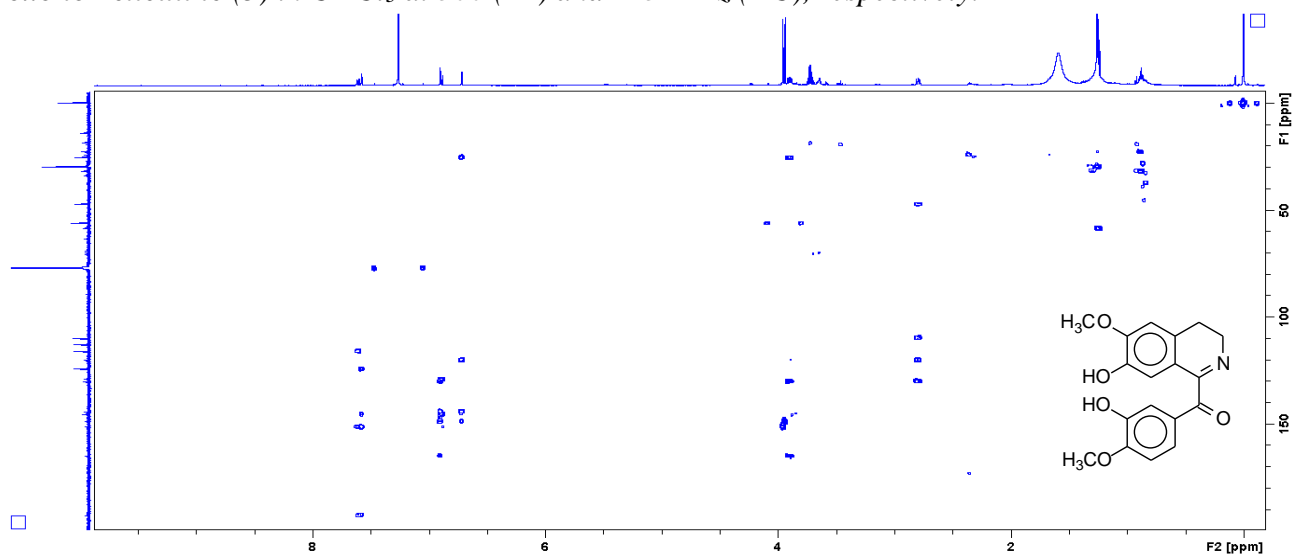

**Figure S42.** Long-range  $^1\text{H}$ - $^{13}\text{C}$  correlation map from HMBC NMR experiment of *dehydro-oxonorreticuline* (**5**) in  $\text{CDCl}_3$  at 500 ( $^1\text{H}$ ) and 125 MHz ( $^{13}\text{C}$ ), respectively.



DEFESA\_16\_04\_2019 #826 RT: 16,65 AV: 1 NL: 2,03E8  
T: + c ESI Q1MS [100,000-1000,000]

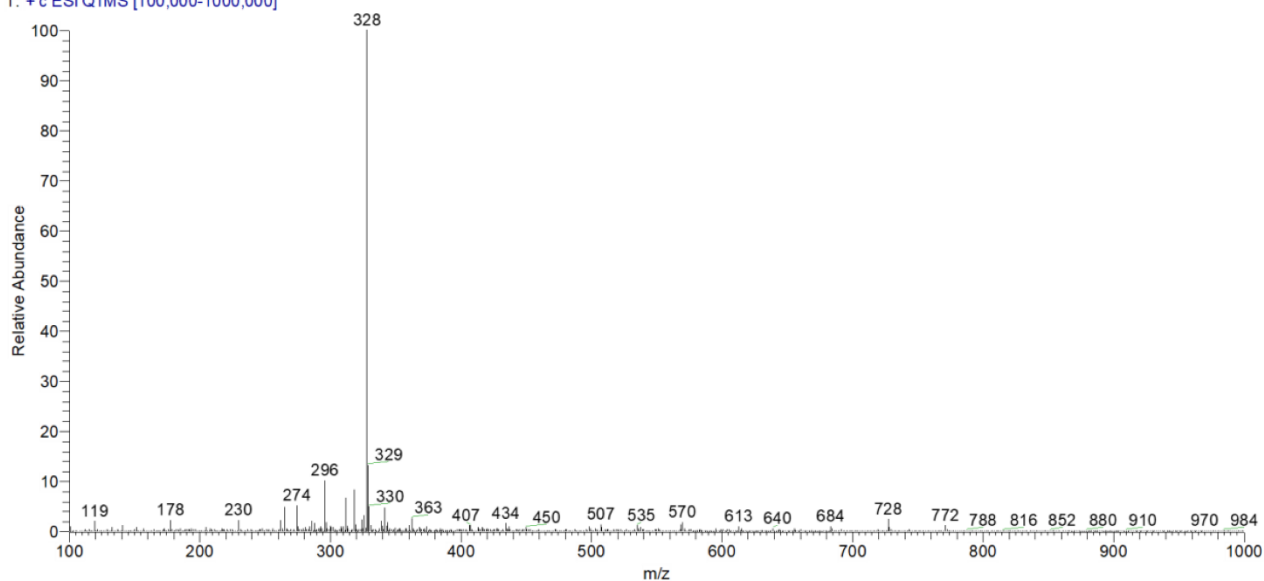

**Figure S43.** LR-ESI(+)-MS spectrum of *dehydro-oxonorreticuline* (**5**) ( $m/z$  328  $[M+H]^+$ ).

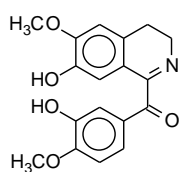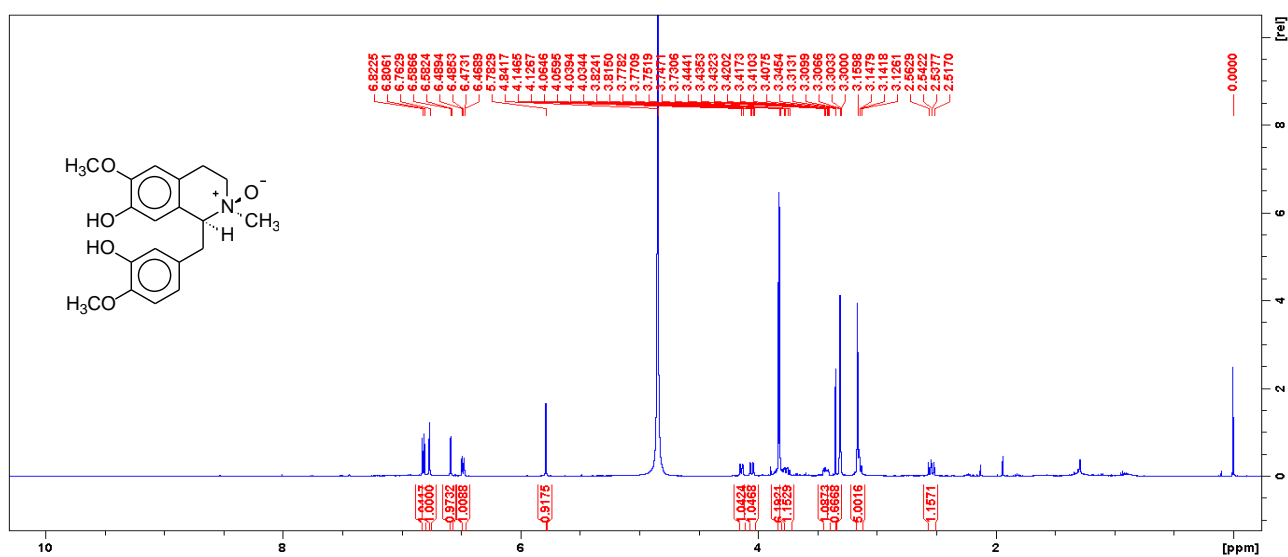

**Figure S44.**  $^1\text{H}$  NMR spectrum of *(+)-1S,2R-reticuline-N $\beta$ -oxide* (**6**) in  $\text{CD}_3\text{OD}$  at 500 MHz.

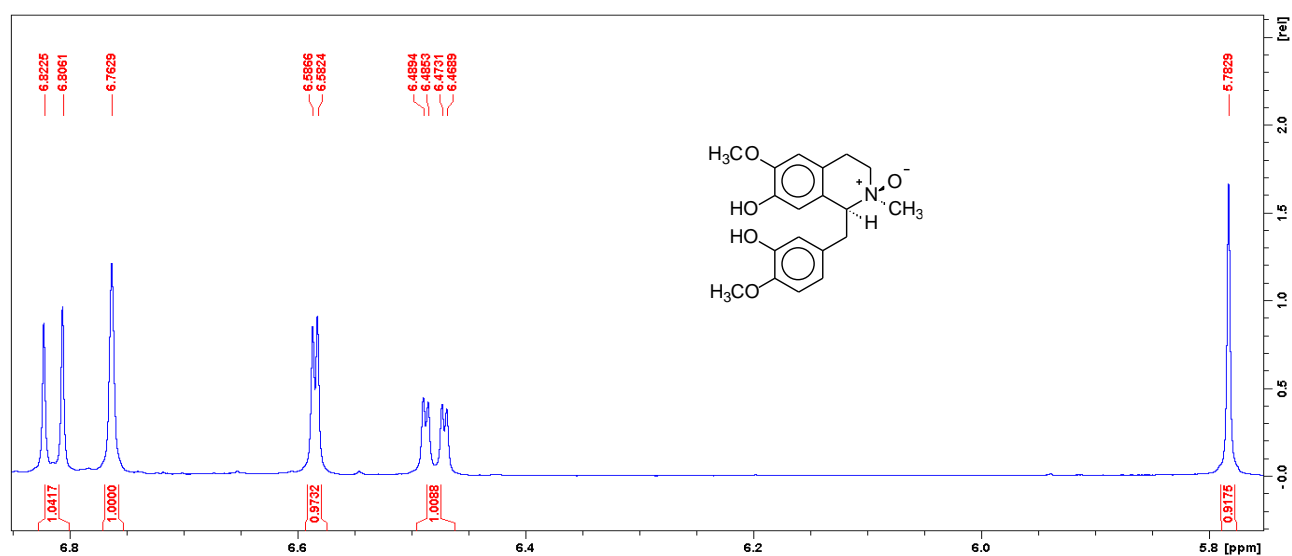

**Figure S45.** Expansion ( $\delta$  6.84 – 5.75) of the  $^1\text{H}$  NMR spectrum of (+)-1S,2R-reticuline-N $\beta$ -oxide (6) in  $\text{CD}_3\text{OD}$  at 500 MHz.

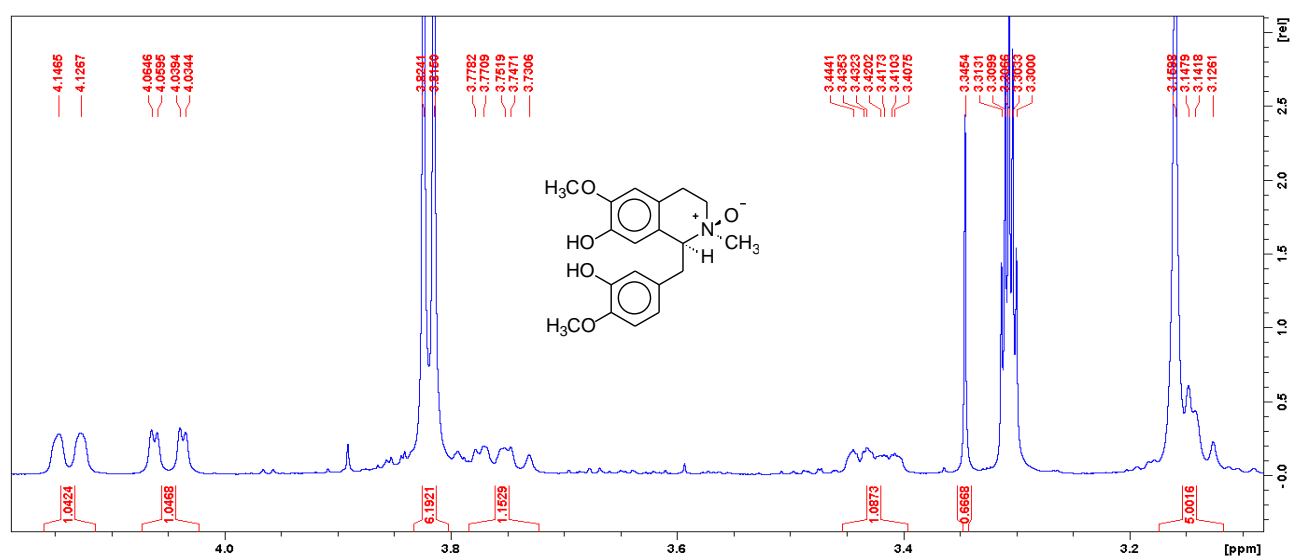

**Figure S46.** Expansion ( $\delta$  3.88 – 2.41) of the  $^1\text{H}$  NMR spectrum of (+)-1S,2R-reticuline-N $\beta$ -oxide (6) in  $\text{CD}_3\text{OD}$  at 500 MHz.

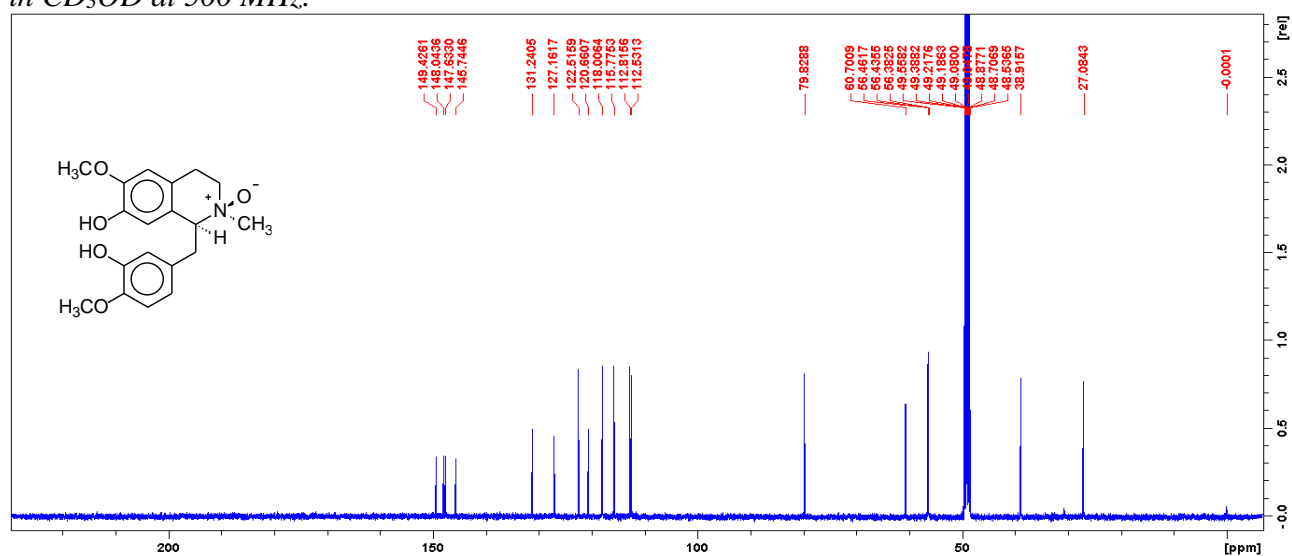

**Figure S47.**  $^{13}\text{C}$  NMR spectrum of (+)-1S,2R-reticuline-N $\beta$ -oxide (6) in  $\text{CD}_3\text{OD}$  at 125 MHz.

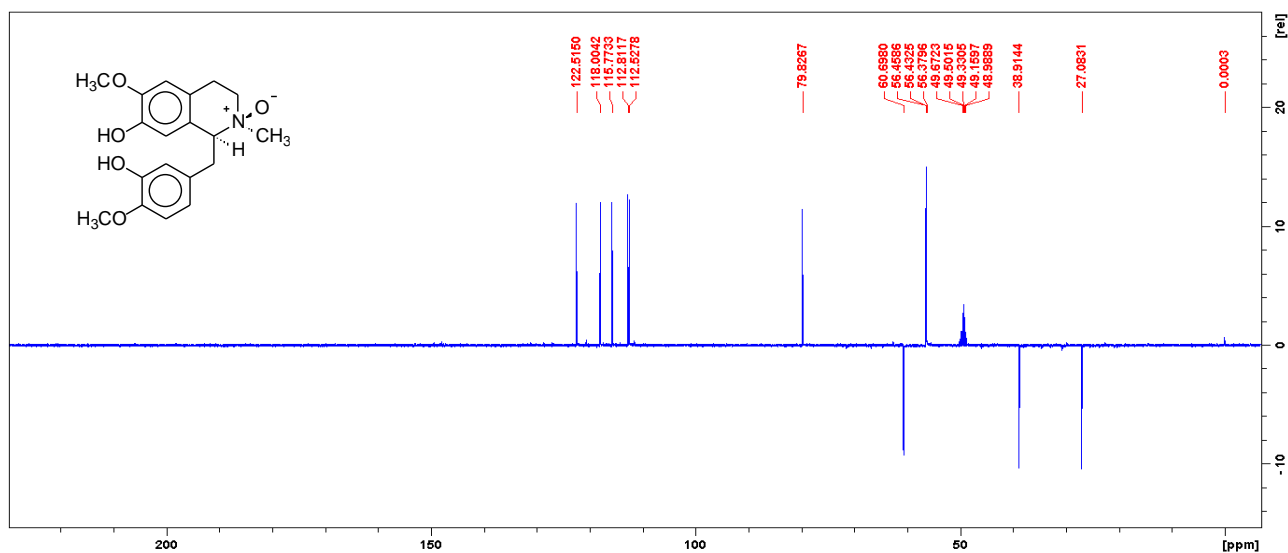

Figure S48. DEPT 135 spectrum of (+)-1S,2R-reticuline-N $\beta$ -oxide (6) in CD<sub>3</sub>OD at 125 MHz.

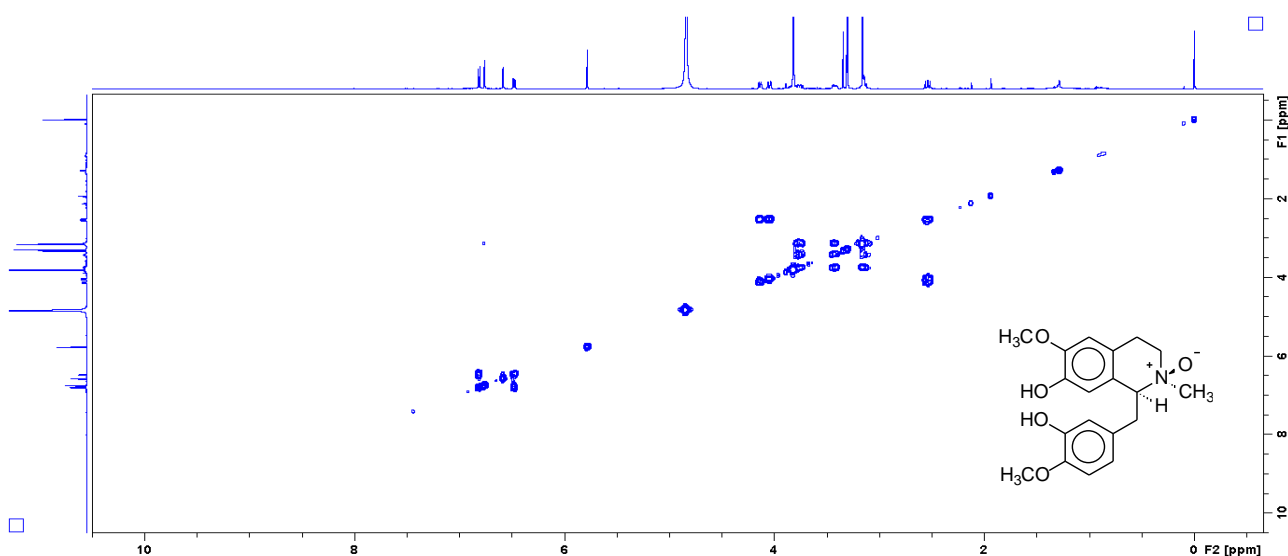

Figure S49.  $^1\text{H}$ - $^1\text{H}$  correlation map from COSY NMR experiment of (+)-1S,2R-reticuline-N $\beta$ -oxide (6) in CD<sub>3</sub>OD at 500 MHz.

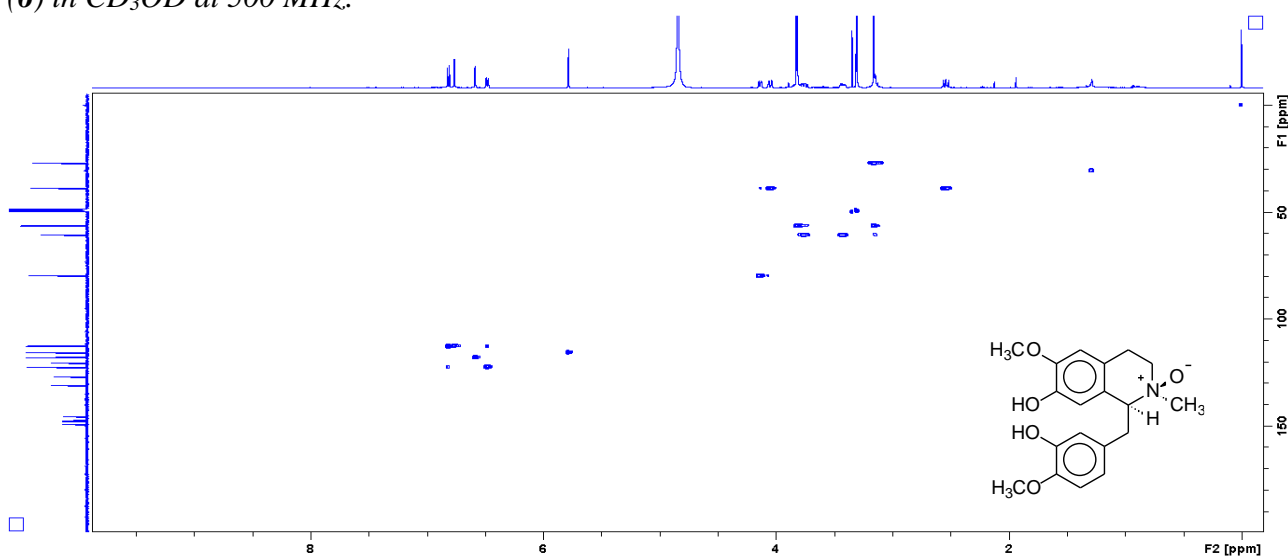

Figure S50. One-bond  $^1\text{H}$ - $^{13}\text{C}$  correlation map from HSQC NMR experiment of (+)-1S,2R-reticuline-N $\beta$ -oxide (6) in CD<sub>3</sub>OD at 500 ( $^1\text{H}$ ) and 125 MHz ( $^{13}\text{C}$ ), respectively.

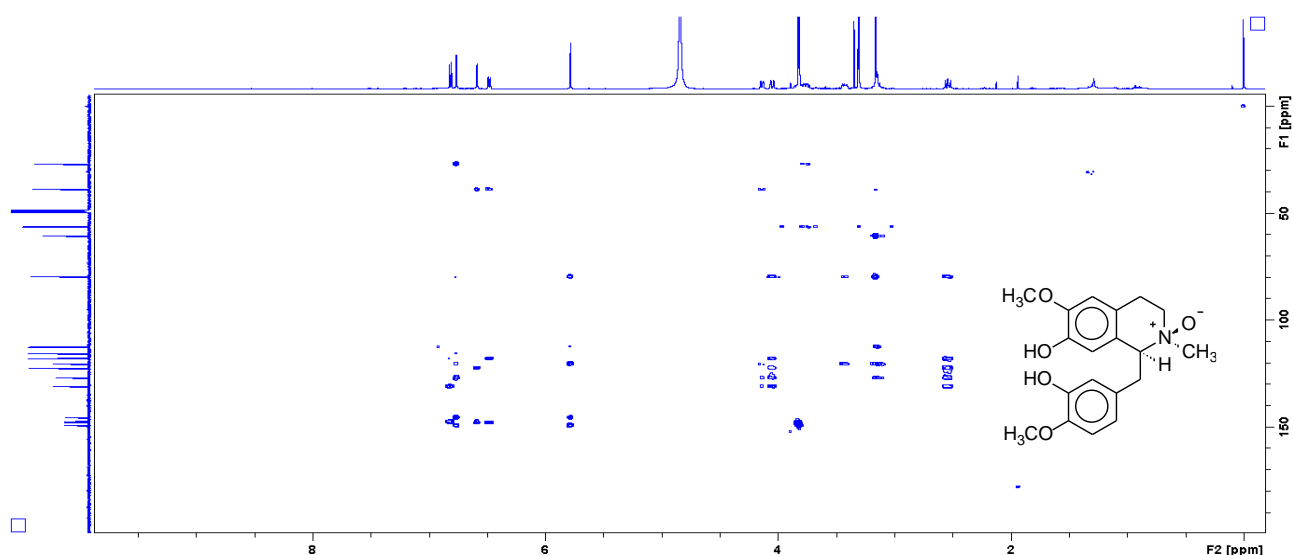

**Figure S51.** Long-range  $^1\text{H}$ - $^{13}\text{C}$  correlation map from HMBC NMR experiment of (+)-1S,2R-reticuline- $\text{N}\beta$ -oxide (**6**) in  $\text{CD}_3\text{OD}$  at 500 ( $^1\text{H}$ ) and 125 MHz ( $^{13}\text{C}$ ), respectively.

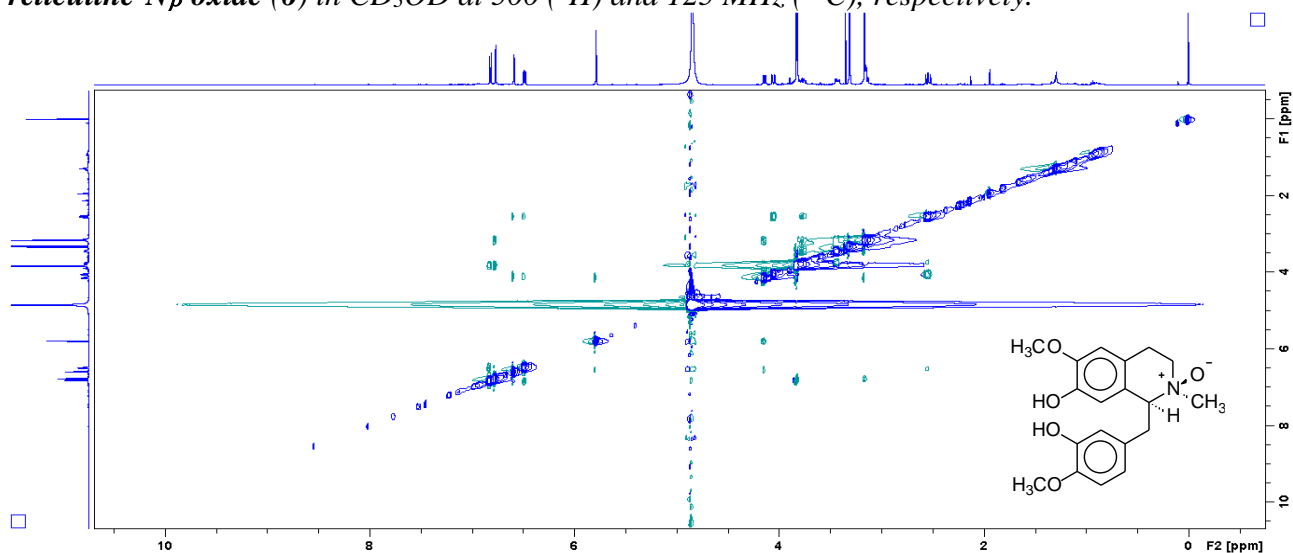

**Figure S52.**  $^1\text{H}$ - $^1\text{H}$  correlation map from NOESY NMR experiment of (+)-1S,2R-reticuline- $\text{N}\beta$ -oxide (**6**) in  $\text{CD}_3\text{OD}$  at 500 ( $^1\text{H}$ ) and 125 MHz ( $^{13}\text{C}$ ), respectively.

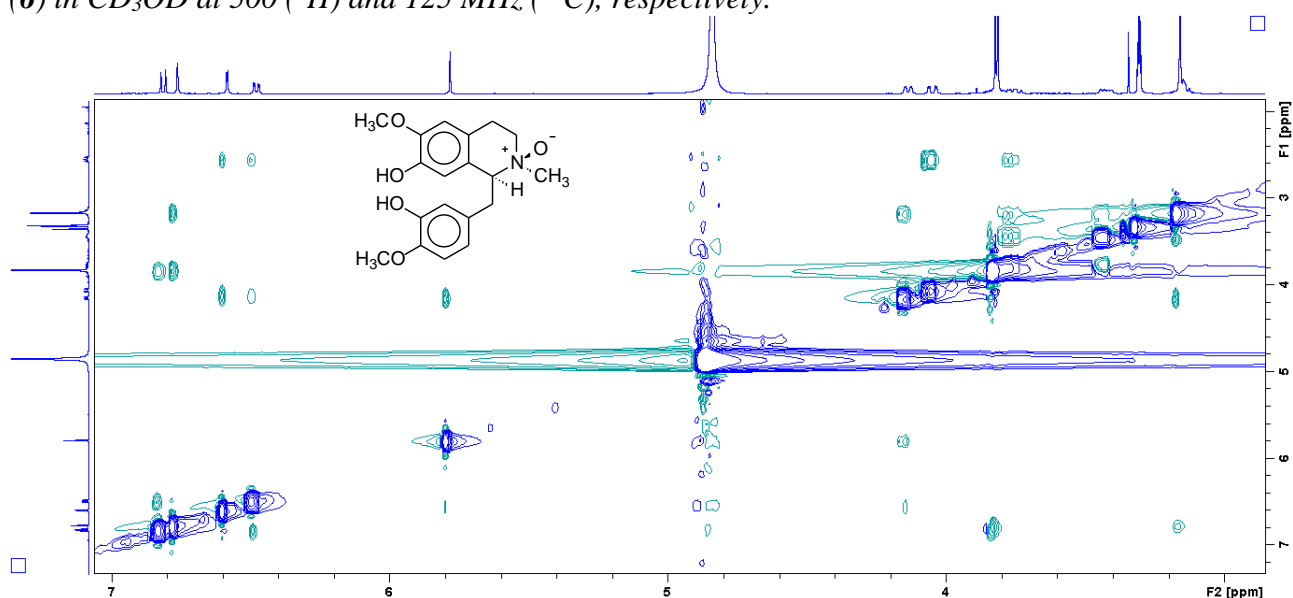

**Figure S53.** Expansion of  $^1\text{H}$ - $^1\text{H}$  correlation map from NOESY NMR experiment of (+)-1S,2R-reticuline- $\text{N}\beta$ -oxide (**6**) in  $\text{CD}_3\text{OD}$  at 500 ( $^1\text{H}$ ) and 125 MHz ( $^{13}\text{C}$ ), respectively.

DC\_08\_05 #216-257 RT: 1.68-1.98 AV: 42 NL: 5,37E8  
T: + c APCI Q1MS [150,000-1000,000]

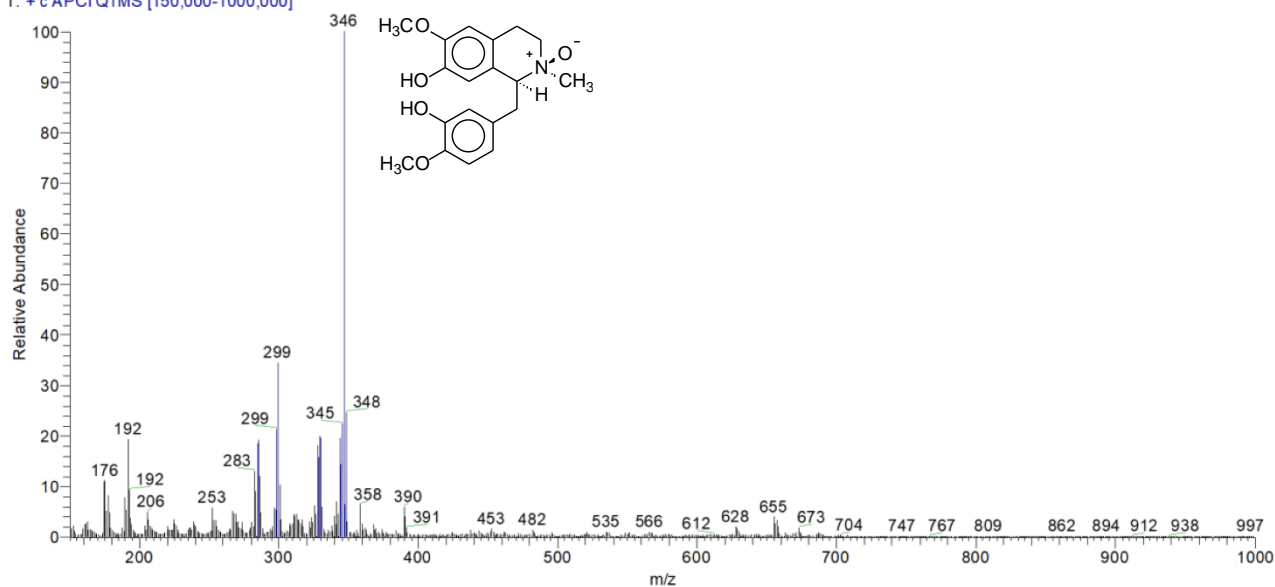

Figure S54. LR-APCI(+)-MS spectrum of (+)-1S,2R-reticuline-N $\beta$ -oxide (6) ( $m/z$  346 [ $M+H$ ] $^+$ ).

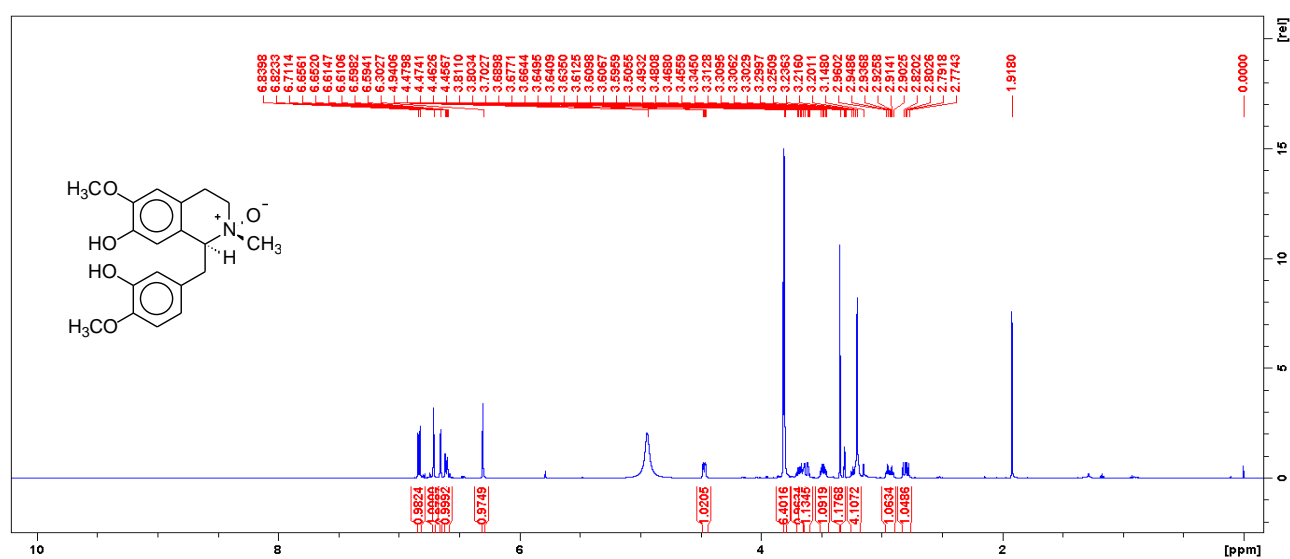

Figure S55.  $^1\text{H}$  NMR spectrum of (+)-1S,2S-reticuline-N $\alpha$ -oxide (7) in  $\text{CD}_3\text{OD}$  at 500 MHz.

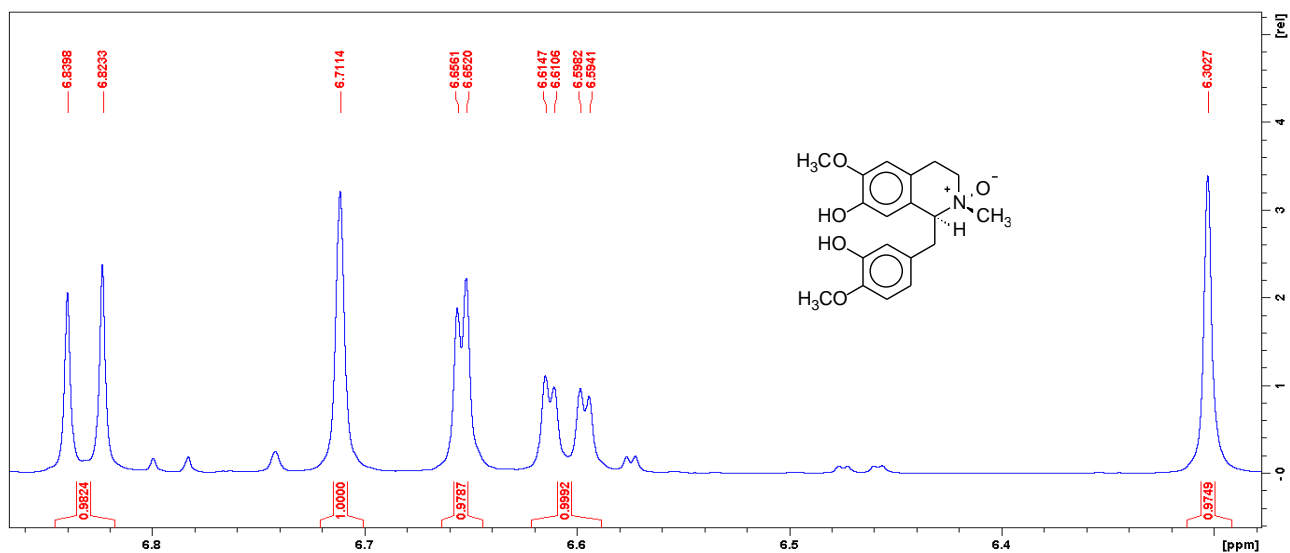

**Figure S56.** Expansion ( $\delta$  6.86 – 6.28) of the  $^1\text{H}$  NMR spectrum of (+)-1S,2S-reticuline-N $\alpha$ -oxide (7) in  $\text{CD}_3\text{OD}$  at 500 MHz.

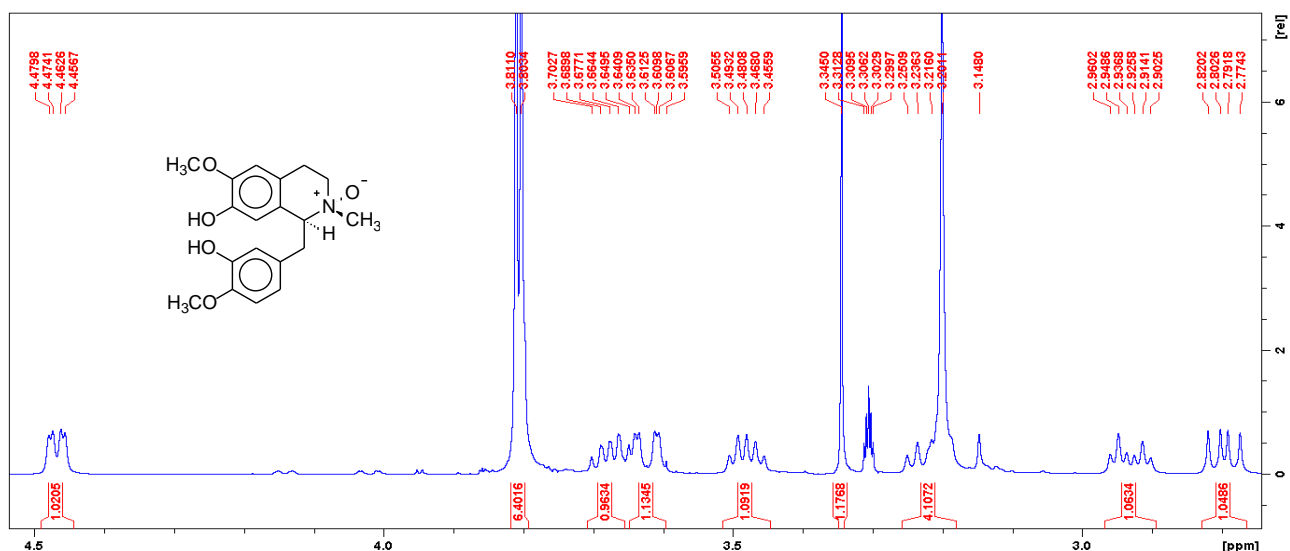

**Figure S57.** Expansion ( $\delta$  4.53 – 2.75) of the  $^1\text{H}$  NMR spectrum of (+)-1S,2S-reticuline-N $\alpha$ -oxide (7) in  $\text{CD}_3\text{OD}$  at 500 MHz.

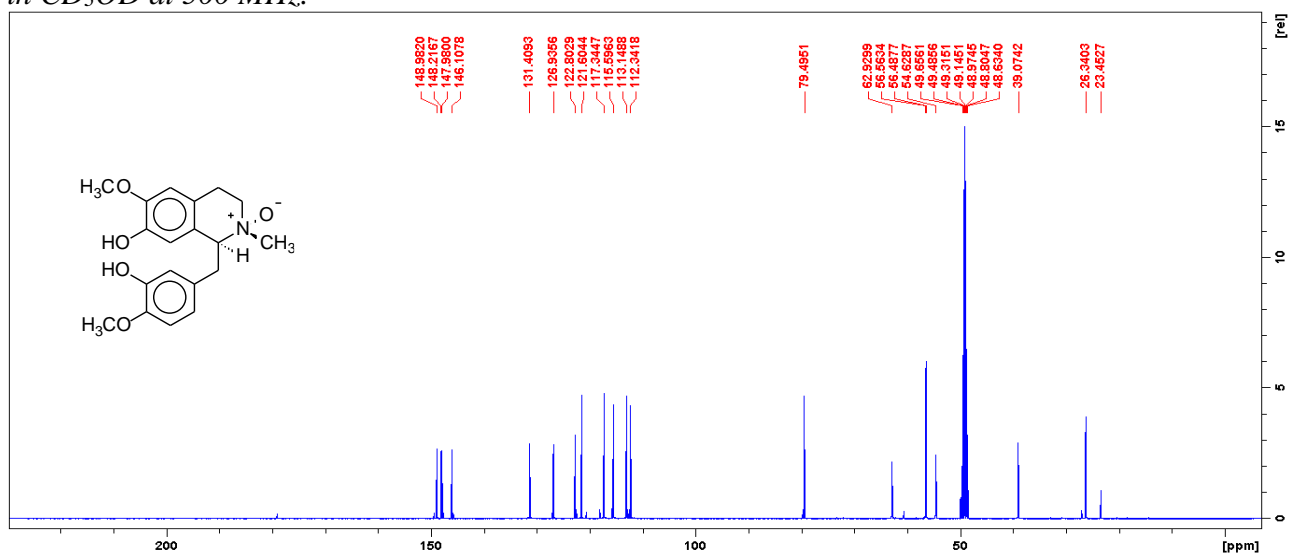

**Figure S58.**  $^{13}\text{C}$  NMR spectrum of (+)-1S,2S-reticuline-N $\alpha$ -oxide (7) in  $\text{CD}_3\text{OD}$  at 125 MHz.

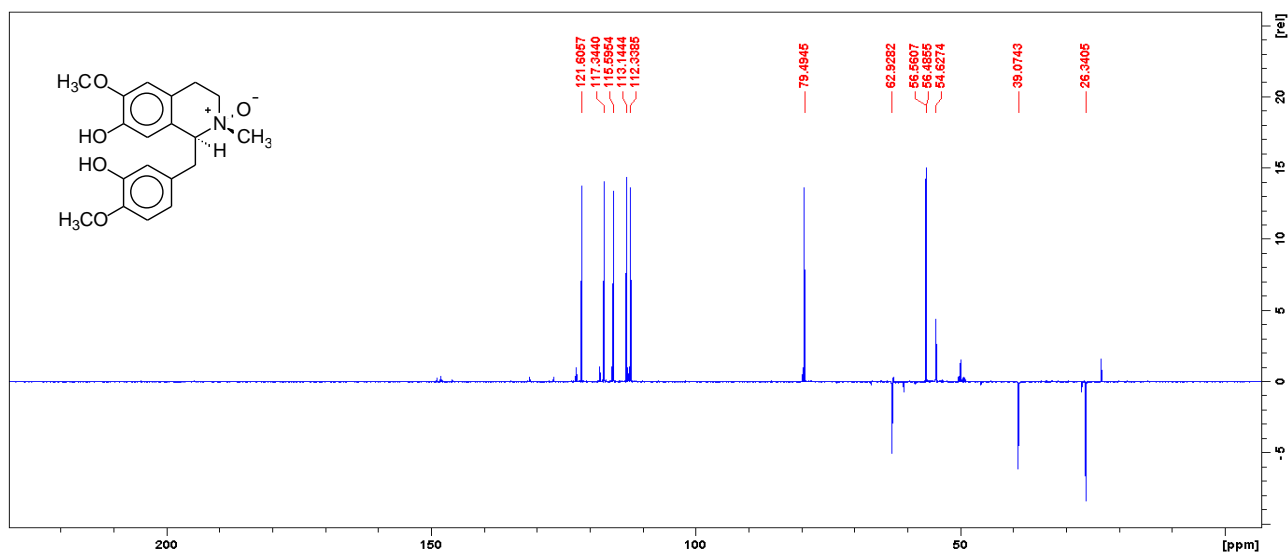

**Figure S59.** DEPT 135 spectrum of (+)-1S,2S-reticuline-N $\alpha$ -oxide (7) in CD<sub>3</sub>OD at 125 MHz.

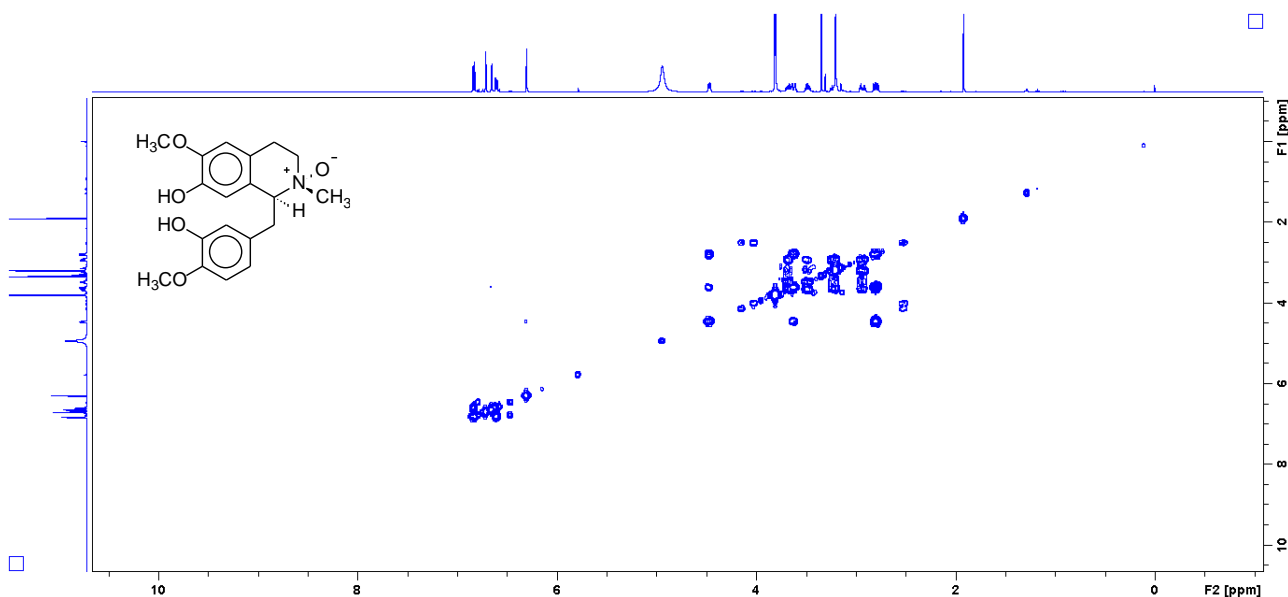

**Figure S60.**  $^1\text{H}$ - $^1\text{H}$  correlation map from COSY NMR experiment of (+)-1S,2S-reticuline-N $\alpha$ -oxide (7) in CD<sub>3</sub>OD at 500 MHz.

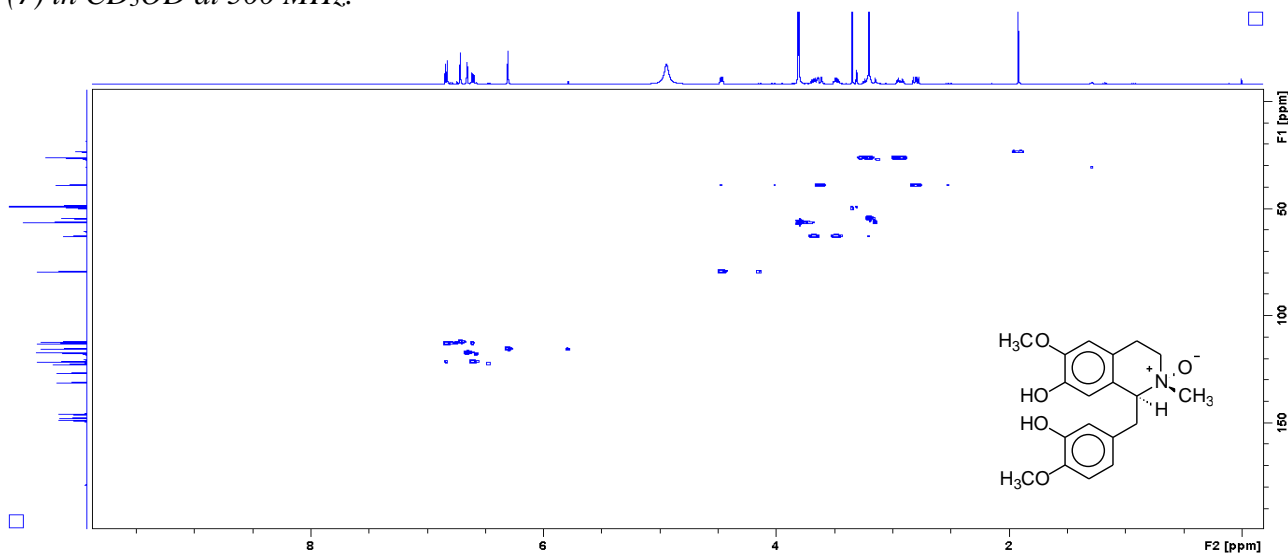

**Figure S61.** One-bond  $^1\text{H}$ - $^{13}\text{C}$  correlation map from HSQC NMR experiment of (+)-1S,2S-reticuline-N $\alpha$ -oxide (7) in CD<sub>3</sub>OD at 500 ( $^1\text{H}$ ) and 125 MHz ( $^{13}\text{C}$ ), respectively.

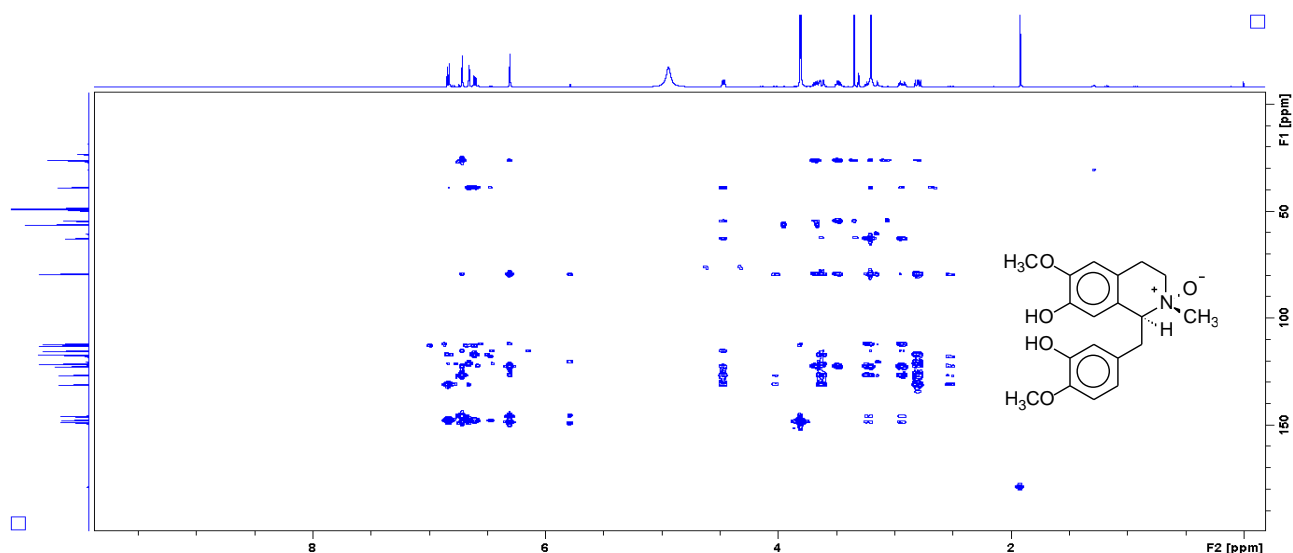

**Figure S62.** Long-range  $^1\text{H}$ - $^{13}\text{C}$  correlation map from HMBC NMR experiment of (+)-1S,2S-reticuline- $N_\alpha$ -oxide (7) in  $\text{CD}_3\text{OD}$  at 500 ( $^1\text{H}$ ) and 125 MHz ( $^{13}\text{C}$ ), respectively.

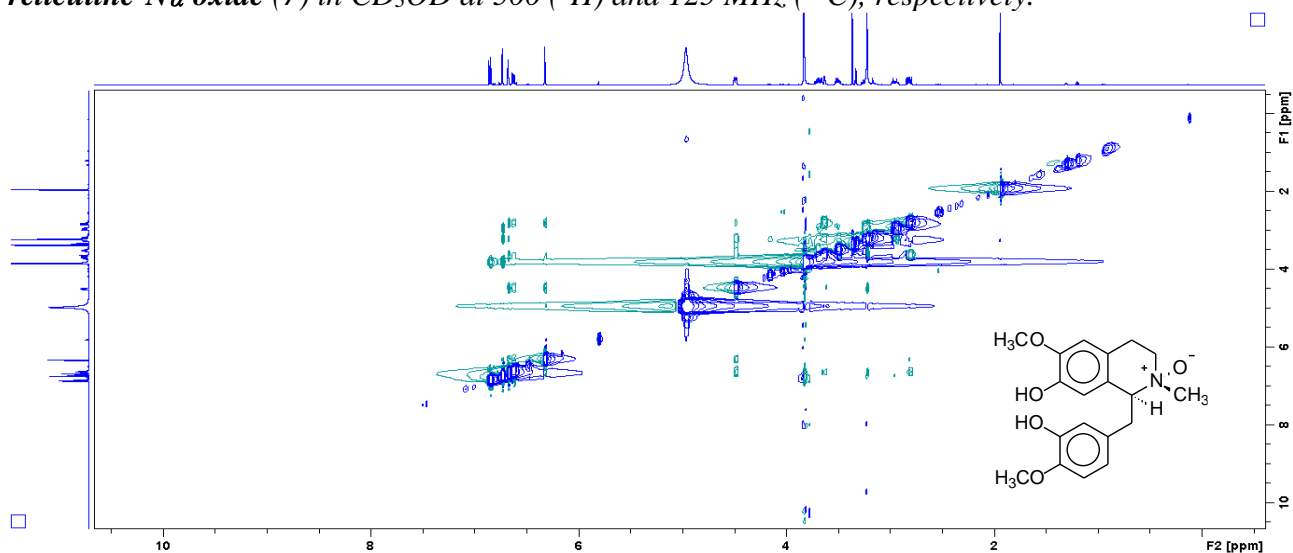

**Figure S63.**  $^1\text{H}$ - $^1\text{H}$  correlation map from NOESY NMR experiment of (+)-1S,2S-reticuline- $N_\alpha$ -oxide (7) in  $\text{CD}_3\text{OD}$  at 500 ( $^1\text{H}$ ) and 125 MHz ( $^{13}\text{C}$ ), respectively.

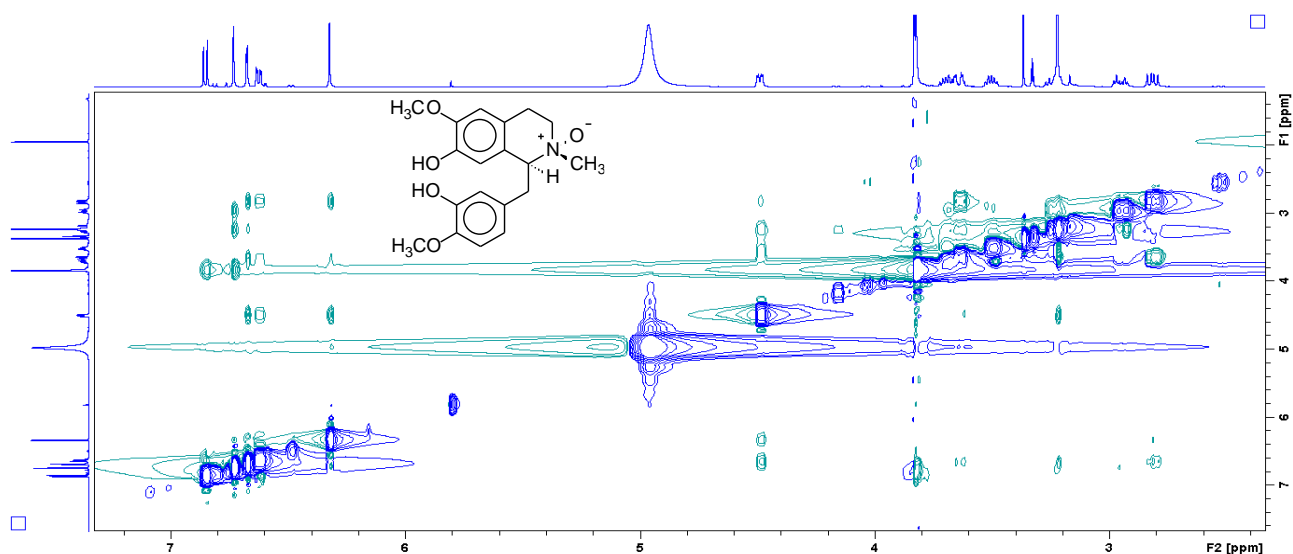

**Figure S64.** Expansion of  $^1\text{H}$ - $^1\text{H}$  correlation map from NOESY NMR experiment of (+)-1S,2S-reticuline- $N_\alpha$ -oxide (7) in  $\text{CD}_3\text{OD}$  at 500 ( $^1\text{H}$ ) and 125 MHz ( $^{13}\text{C}$ ), respectively.



DC\_08\_05#361 RT: 2.78 AV: 1 NL: 7.76E8  
T: +c APCI Q1MS [150,000-1000,000]

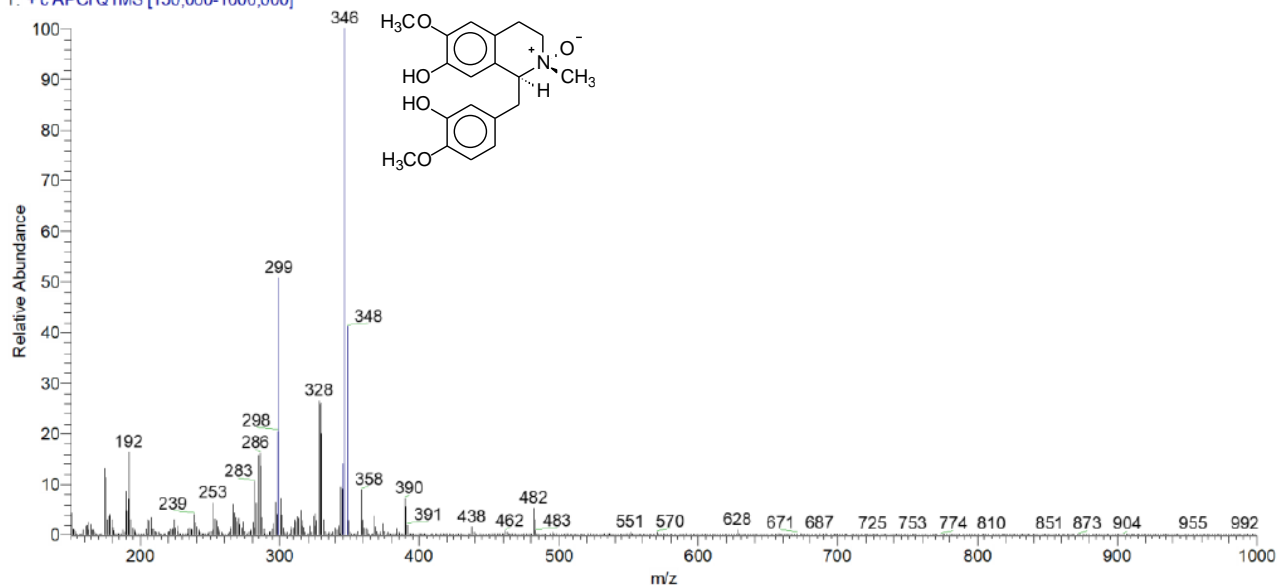

Figure S65. LR-APCI(+)-MS spectrum of (+)-1S,2S-reticuline-N-oxide (7) ( $m/z$  345  $[M+H]^+$ ).

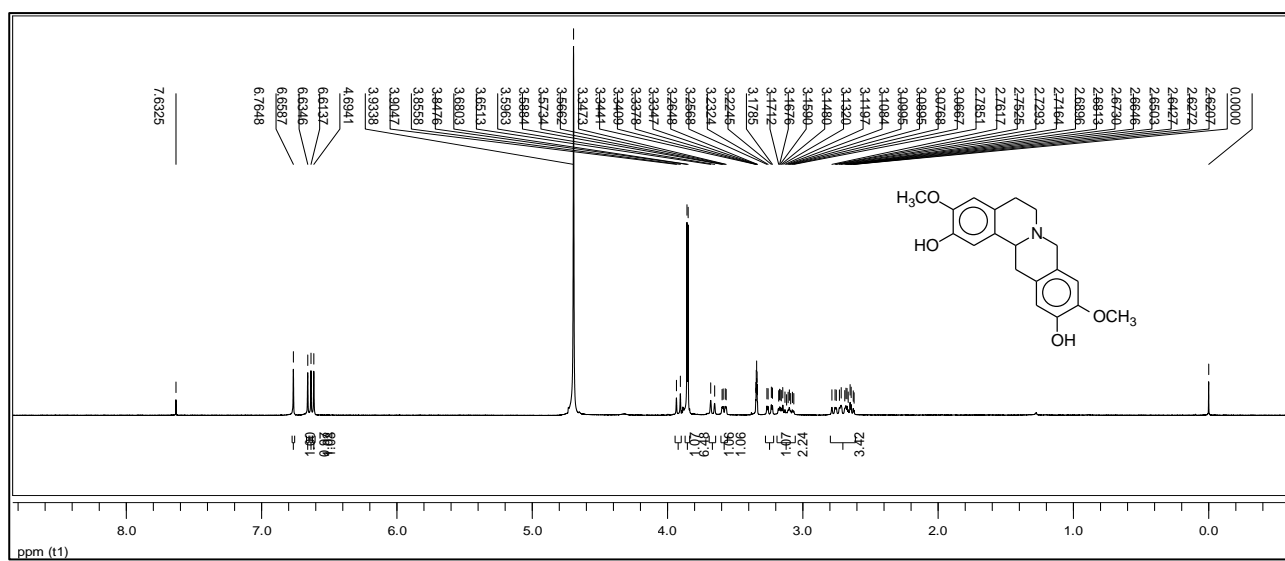

Figure S66.  $^1\text{H}$  NMR spectrum of coreximine (8) in  $\text{CDCl}_3$  plus drops of  $\text{CD}_3\text{OD}$  at 500 MHz.

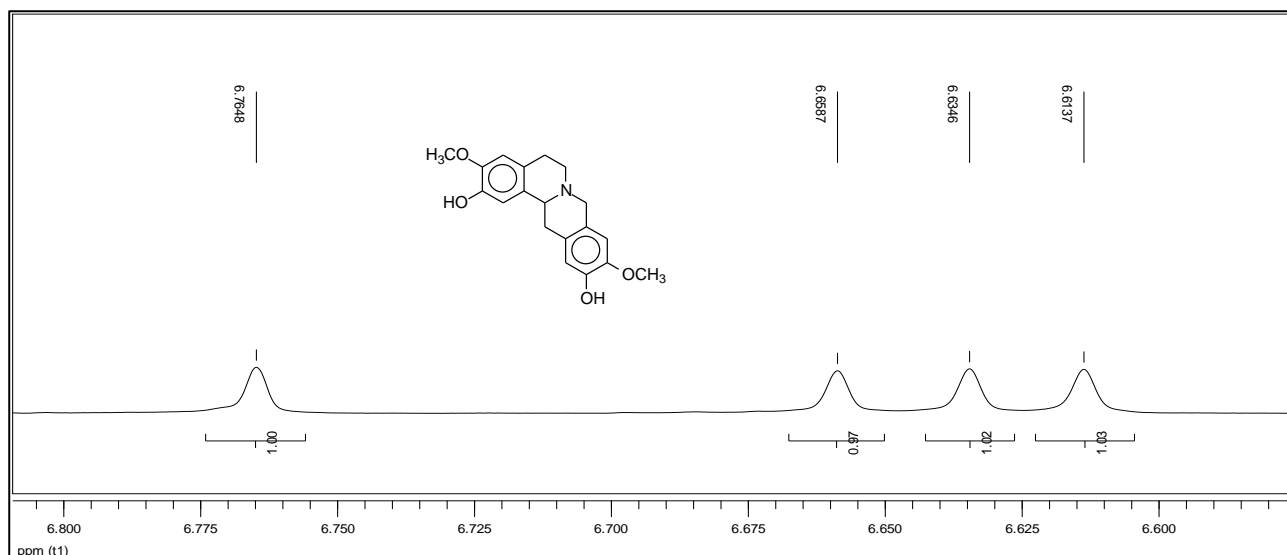

**Figure S67.** Expansion ( $\delta$  6.80 – 6.57) of the  $^1\text{H}$  NMR spectrum of **coreximine** (**8**) in  $\text{CDCl}_3$  plus drops of  $\text{CD}_3\text{OD}$  at 500 MHz.

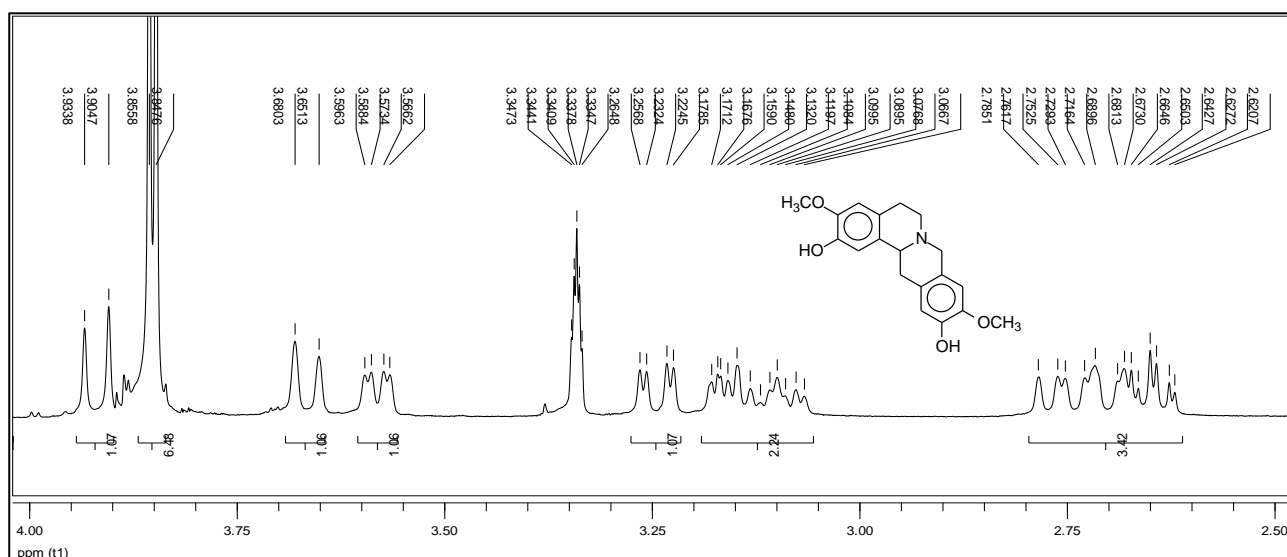

**Figure S68.** Expansion ( $\delta$  4.00 – 2.49) of the  $^1\text{H}$  NMR spectrum of **coreximine** (**8**) in  $\text{CDCl}_3$  plus drops of  $\text{CD}_3\text{OD}$  at 500 MHz.

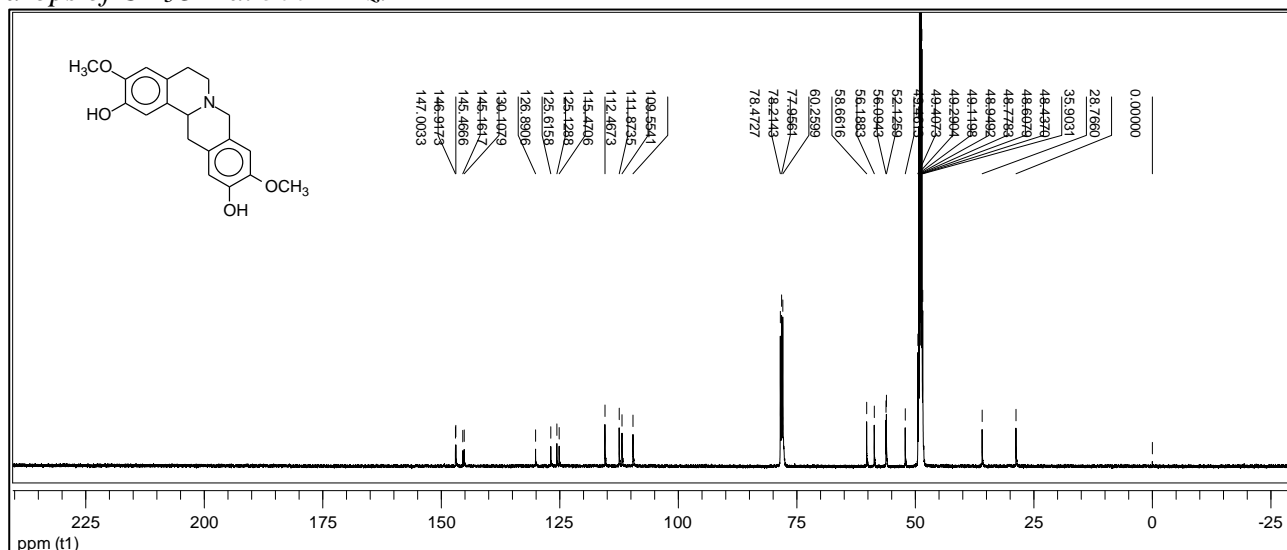

**Figure S69.**  $^{13}\text{C}$  NMR spectrum of **coreximine** (**8**) in  $\text{CDCl}_3$  plus drops of  $\text{CD}_3\text{OD}$  at 125 MHz.

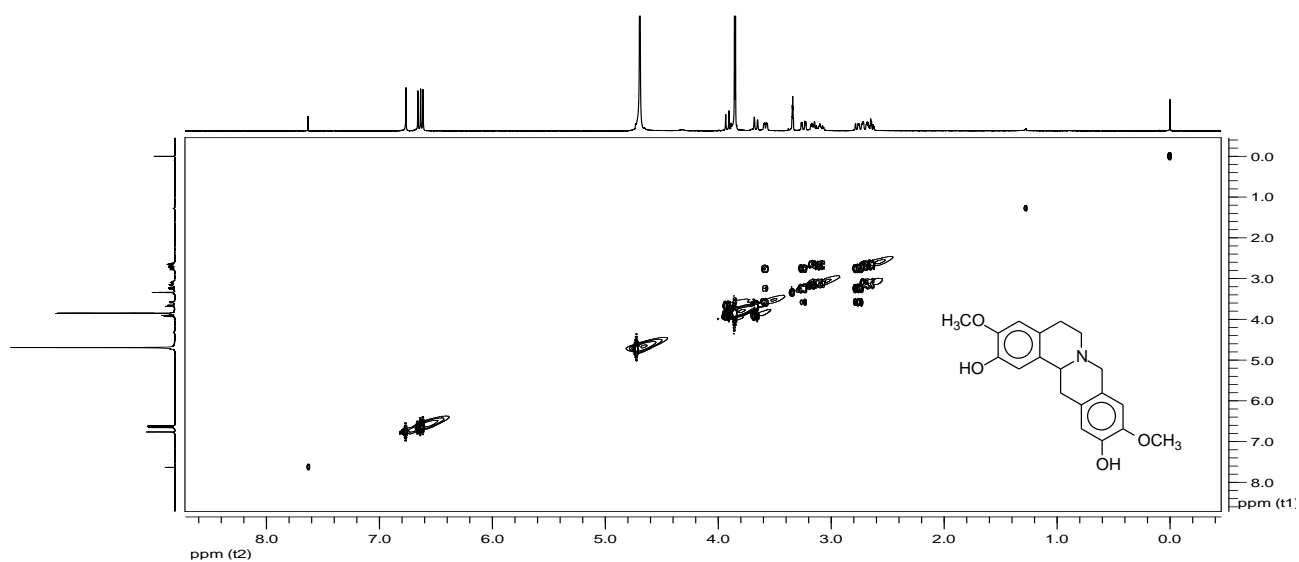

**Figure S70.**  $^1\text{H}$ - $^1\text{H}$  correlation map from COSY NMR experiment of **coreximine (8)** in  $\text{CDCl}_3$  plus drops of  $\text{CD}_3\text{OD}$  in  $\text{CD}_3\text{OD}$  at 500 MHz.

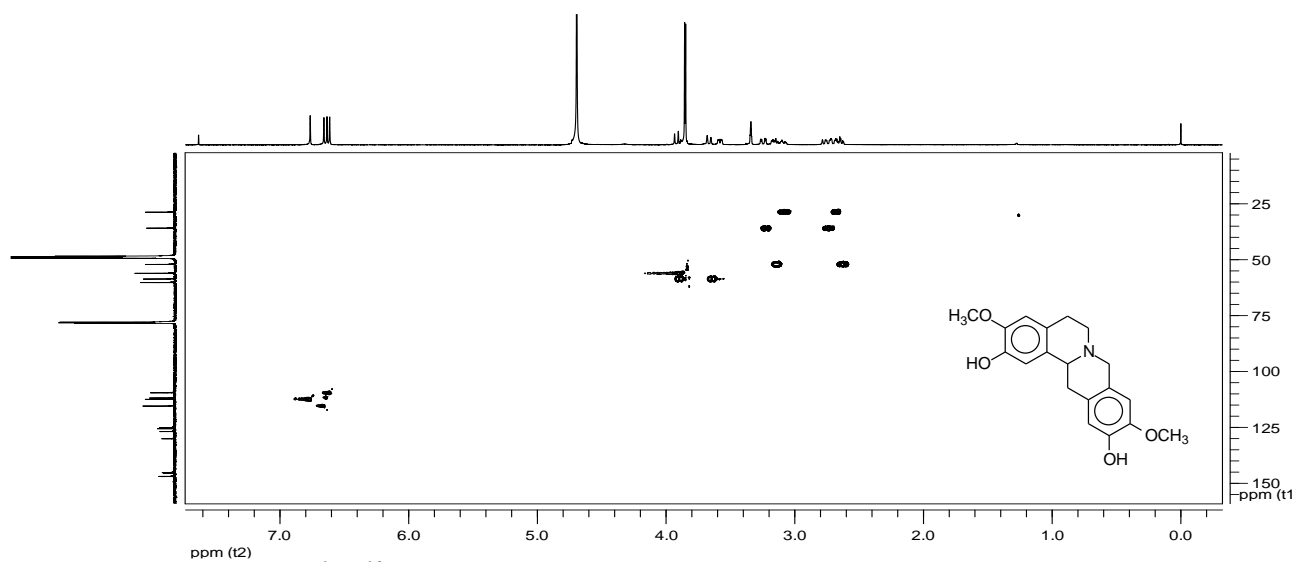

**Figure S71.** One-bond  $^1\text{H}$ - $^{13}\text{C}$  correlation map from HSQC NMR experiment of **coreximine (8)** in  $\text{CDCl}_3$  plus drops of  $\text{CD}_3\text{OD}$  at 500 ( $^1\text{H}$ ) and 125 MHz ( $^{13}\text{C}$ ), respectively.

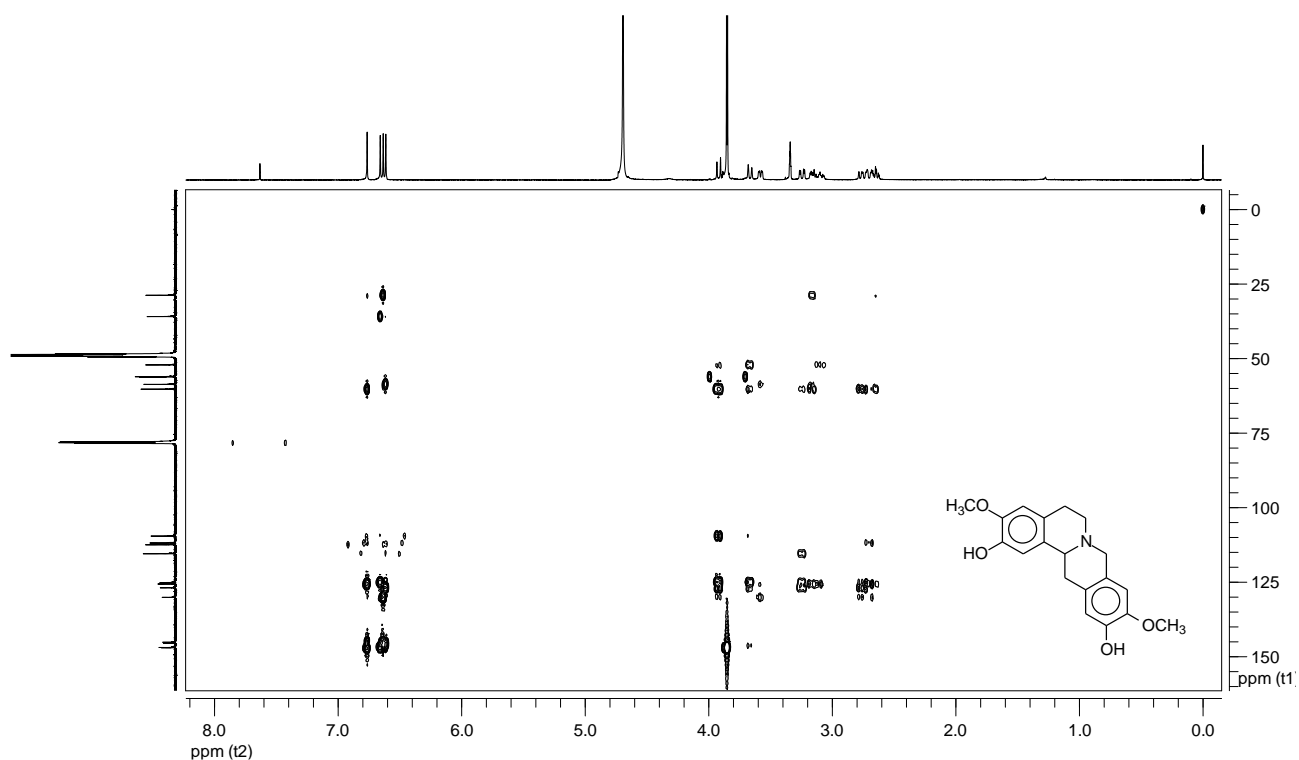

**Figure S72.** Long-range  $^1\text{H}$ - $^{13}\text{C}$  correlation map from HMBC NMR experiment of **coreximine (8)** in  $\text{CDCl}_3$  plus drops of  $\text{CD}_3\text{OD}$  at 500 ( $^1\text{H}$ ) and 125 MHz ( $^{13}\text{C}$ ), respectively.

DEFESA\_16\_04\_2019#823-841 RT: 16.59-16.79 AV: 11 NL: 5,00E7  
T: + c ESI Q1 MS [100,000-1000,000]

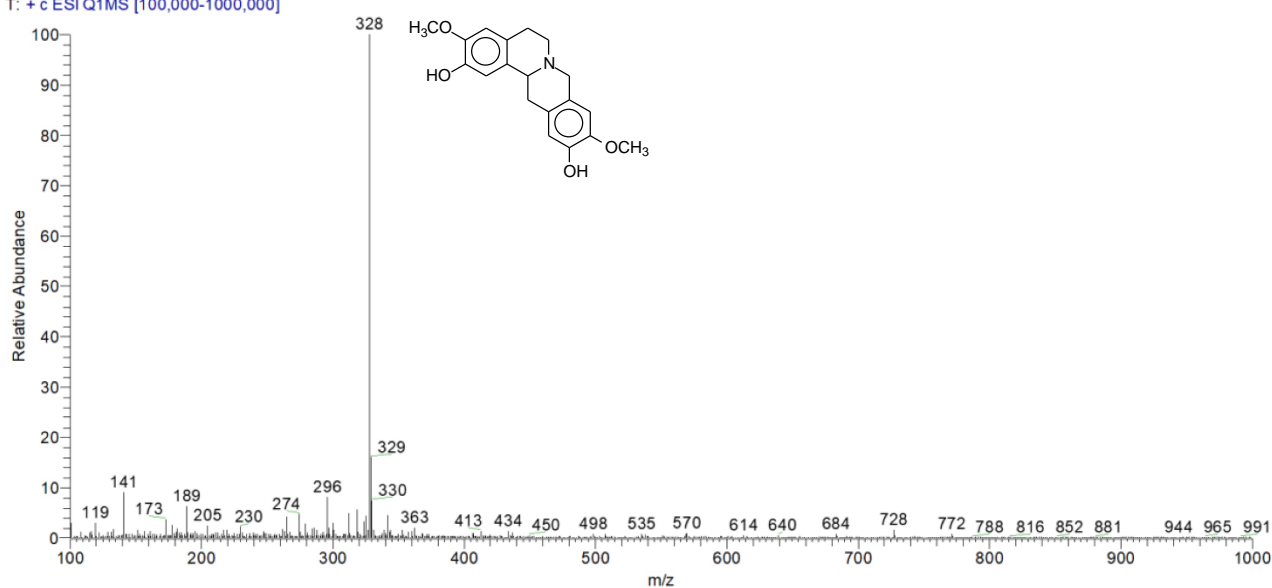

**Figure S73.** LR-ESI(+)-MS spectrum of **coreximine (8)** ( $m/z$  328 [ $M+H$ ] $^+$ ).

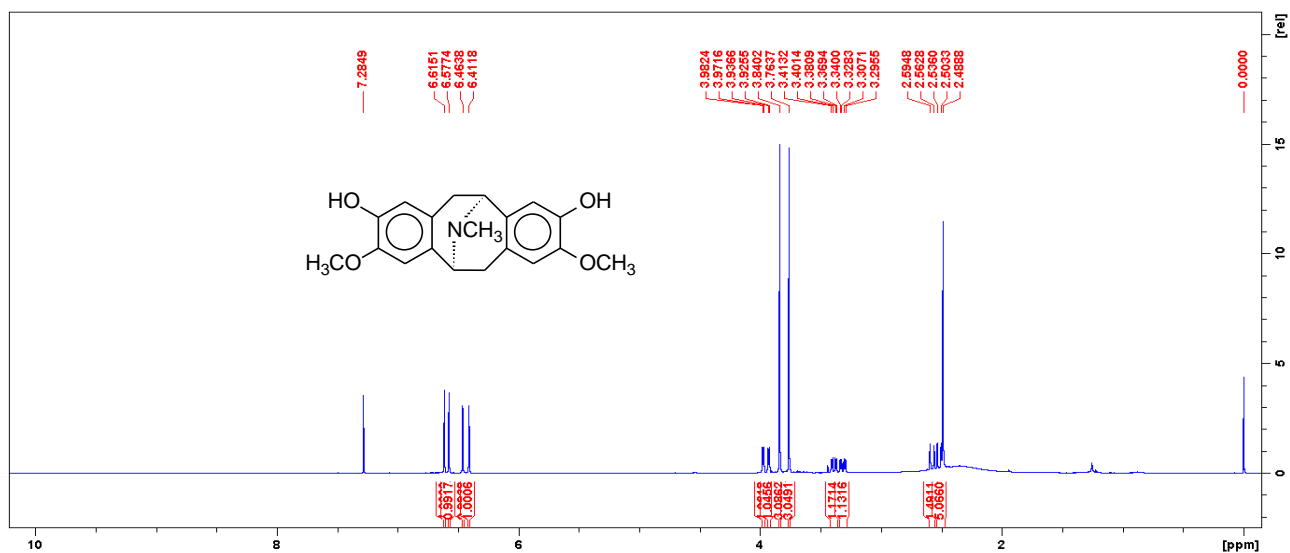

Figure S74.  $^1\text{H}$  NMR spectrum of *bisnorargemonine* (9) in  $\text{CDCl}_3$  plus drop of  $\text{CD}_3\text{OD}$  at 500 MHz.

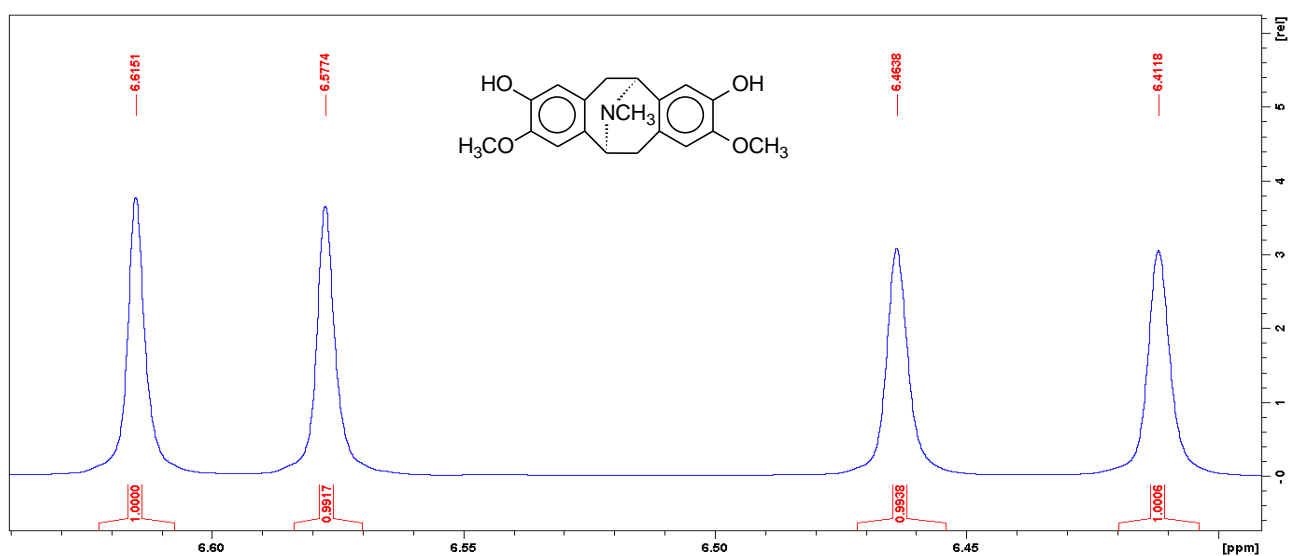

Figure S75. Expansion ( $\delta$  6.63 – 6.39) of the  $^1\text{H}$  NMR spectrum of *bisnorargemonine* (9) in  $\text{CDCl}_3$  plus drop of  $\text{CD}_3\text{OD}$  at 500 MHz.

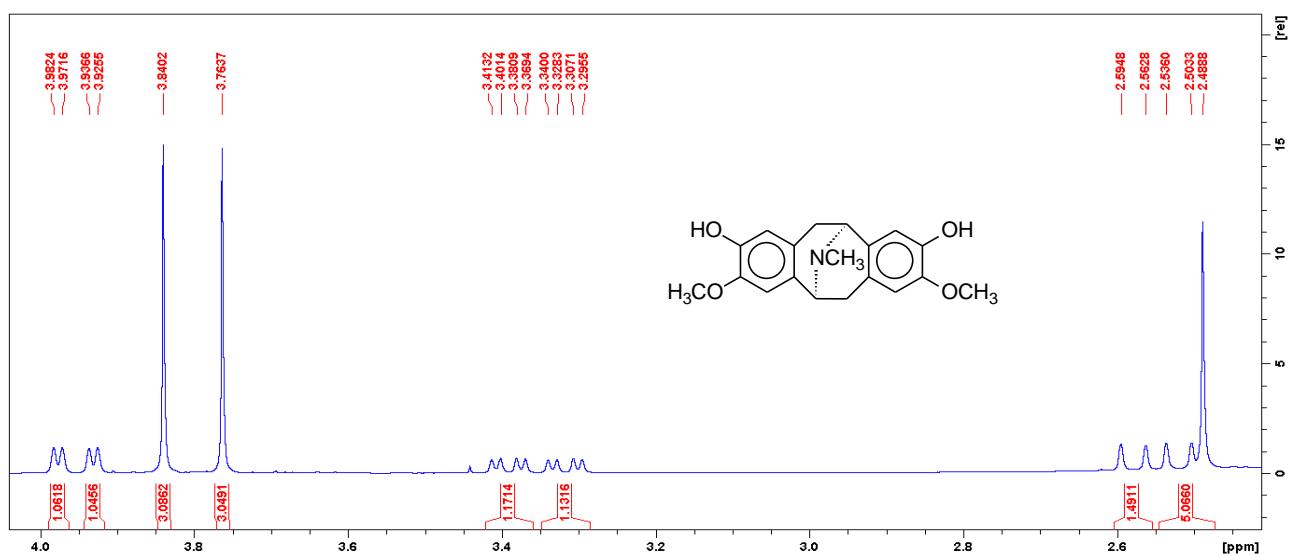

Figure S76. Expansion ( $\delta$  4.03 – 2.42) of the  $^1\text{H}$  NMR spectrum of *bisnorargemonine* (9) in  $\text{CDCl}_3$  plus drop of  $\text{CD}_3\text{OD}$  at 500 MHz.

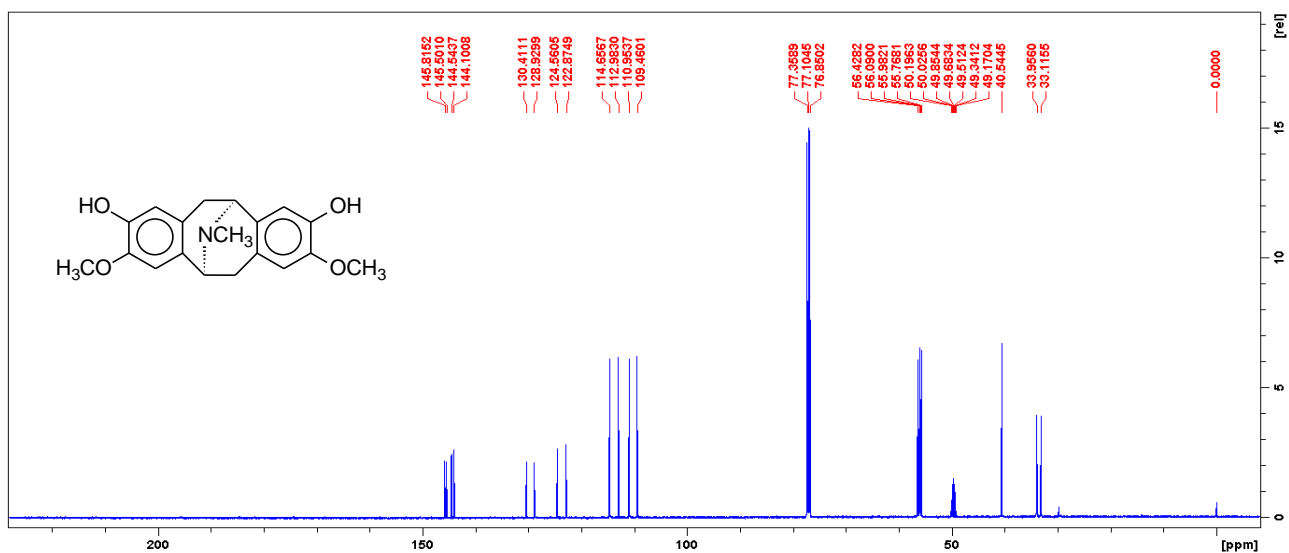

Figure S77. <sup>13</sup>C NMR spectrum of *bisnorargemonine* (9) in CDCl<sub>3</sub> plus drop of CD<sub>3</sub>OD at 125 MHz.

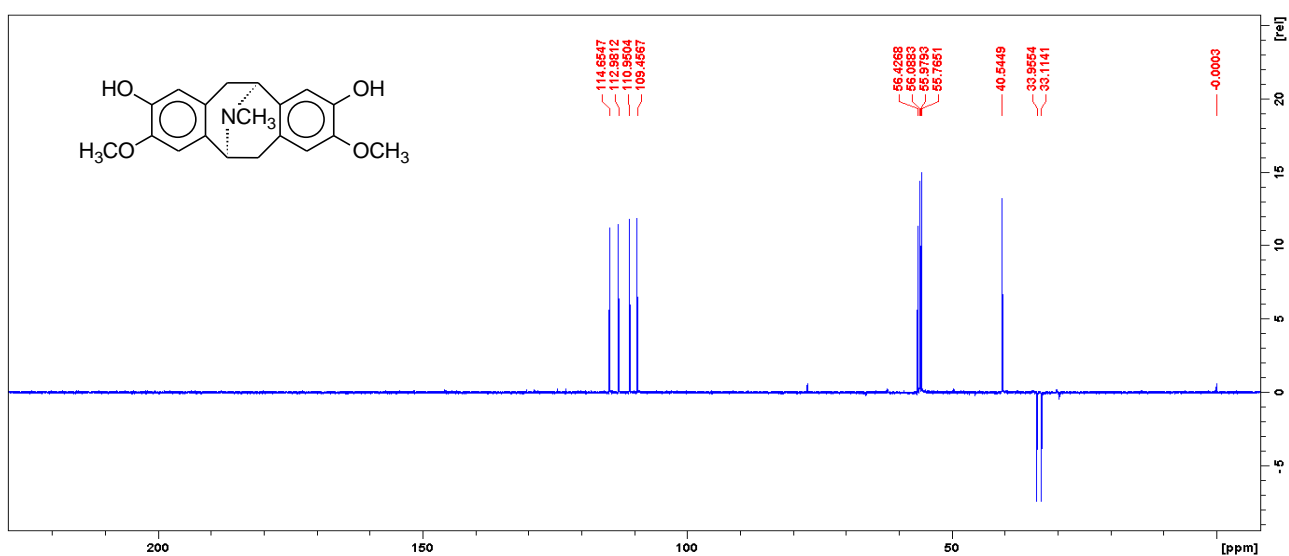

Figure S78. DEPT 135 spectrum of *bisnorargemonine* (9) in CDCl<sub>3</sub> plus drop of CD<sub>3</sub>OD at 125 MHz.

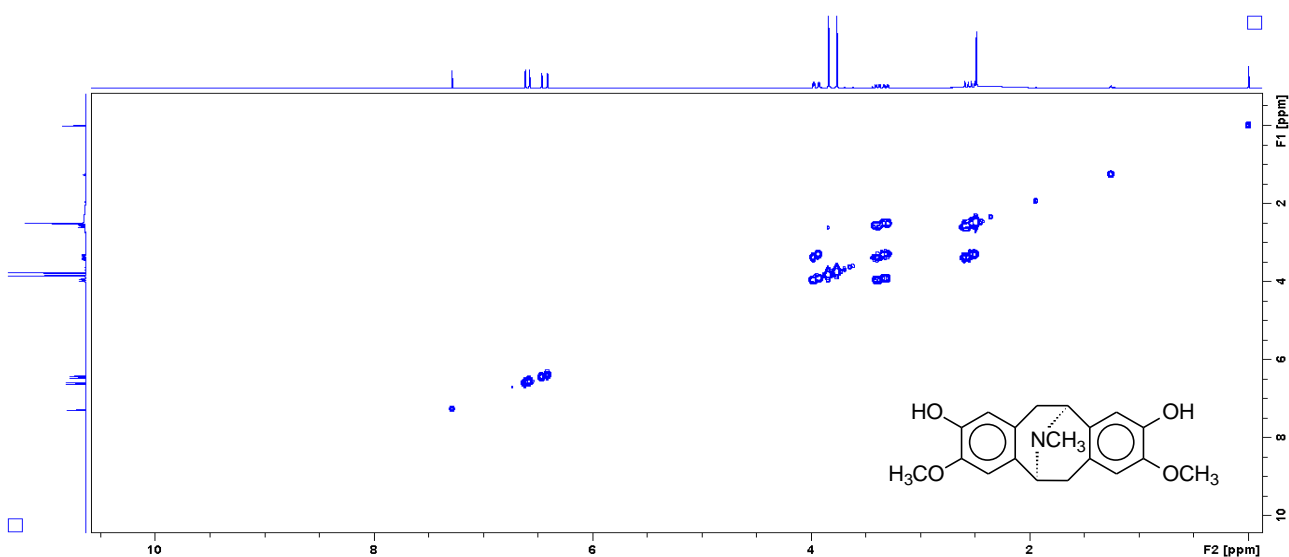

Figure S79. <sup>1</sup>H-<sup>1</sup>H correlation map from COSY NMR experiment of *bisnorargemonine* (9) in CDCl<sub>3</sub> plus drop of CD<sub>3</sub>OD at 500 MHz.

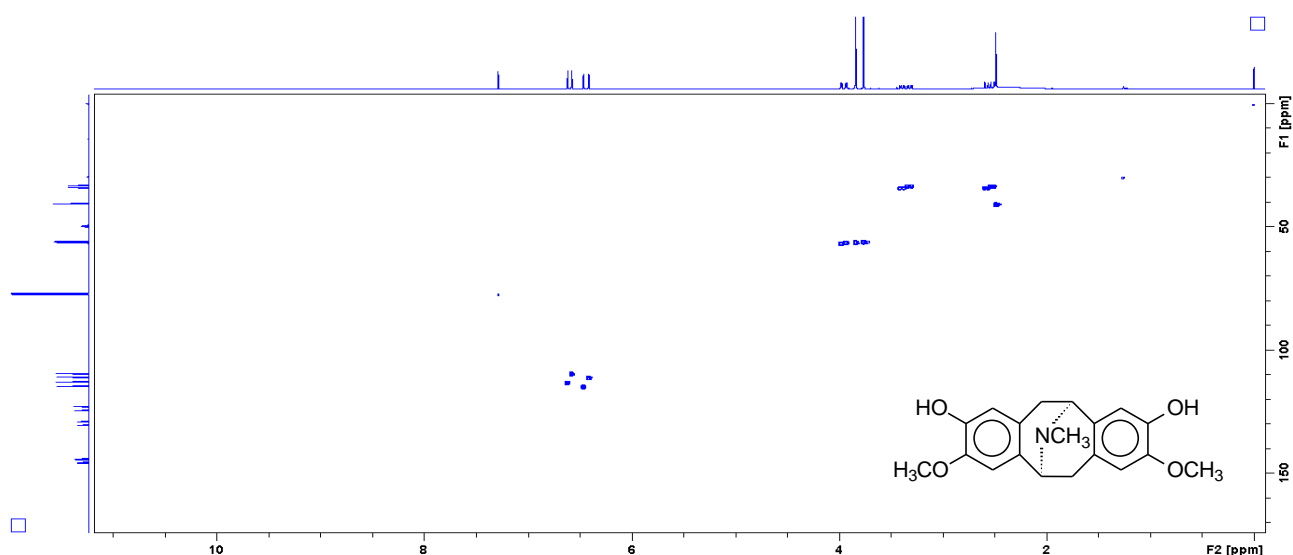

**Figure S80.** One-bond  $^1\text{H}$ - $^{13}\text{C}$  correlation map from HSQC NMR experiment of *bisnorargemonine* (**9**) in  $\text{CDCl}_3$  plus drop of  $\text{CD}_3\text{OD}$  at 500 ( $^1\text{H}$ ) and 125  $\text{MHz}$  ( $^{13}\text{C}$ ), respectively.

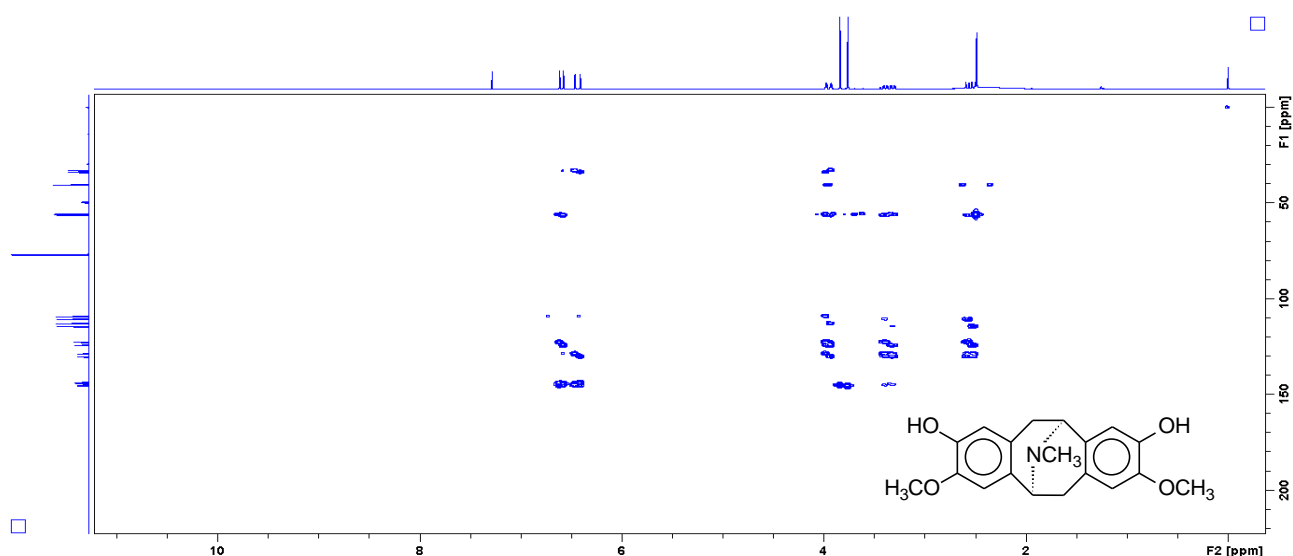

**Figure S81.** Long-range  $^1\text{H}$ - $^{13}\text{C}$  correlation map from HMBC NMR experiment of *bisnorargemonine* (**9**) in  $\text{CDCl}_3$  plus drop of  $\text{CD}_3\text{OD}$  at 500 ( $^1\text{H}$ ) and 125  $\text{MHz}$  ( $^{13}\text{C}$ ), respectively.

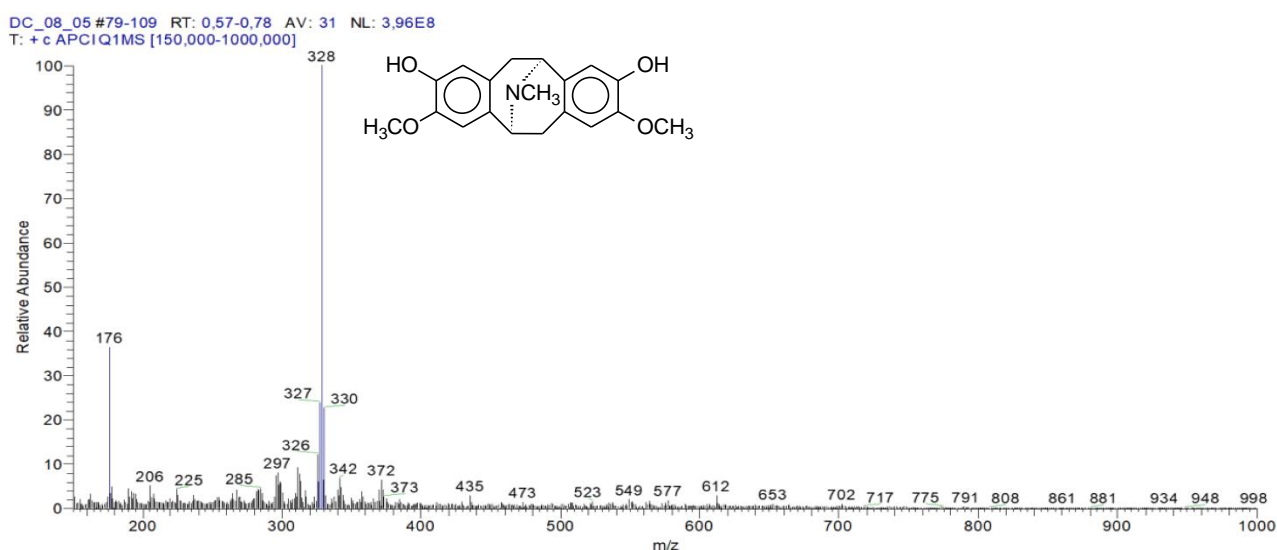

**Figure S82.** LR-APCI(+)-MS spectrum of *bisnorargemonine* (**9**) ( $m/z$  328 [ $M+H$ ] $^+$ ).

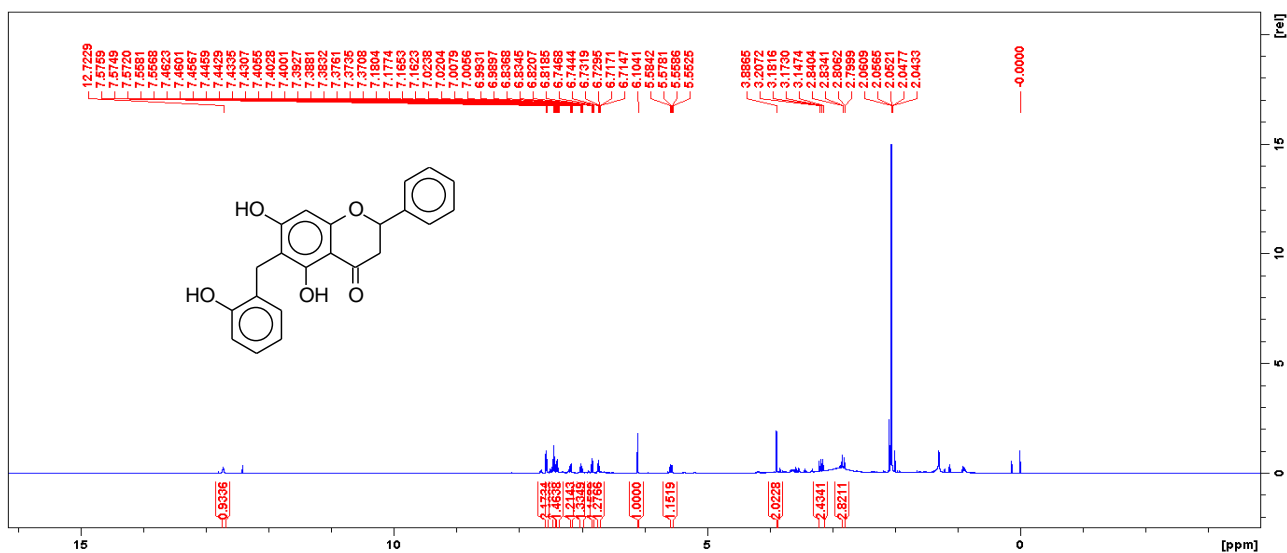

Figure S83.  $^1\text{H}$  NMR spectrum of isochamanetin (10) in acetone- $d_6$  at 500 MHz.

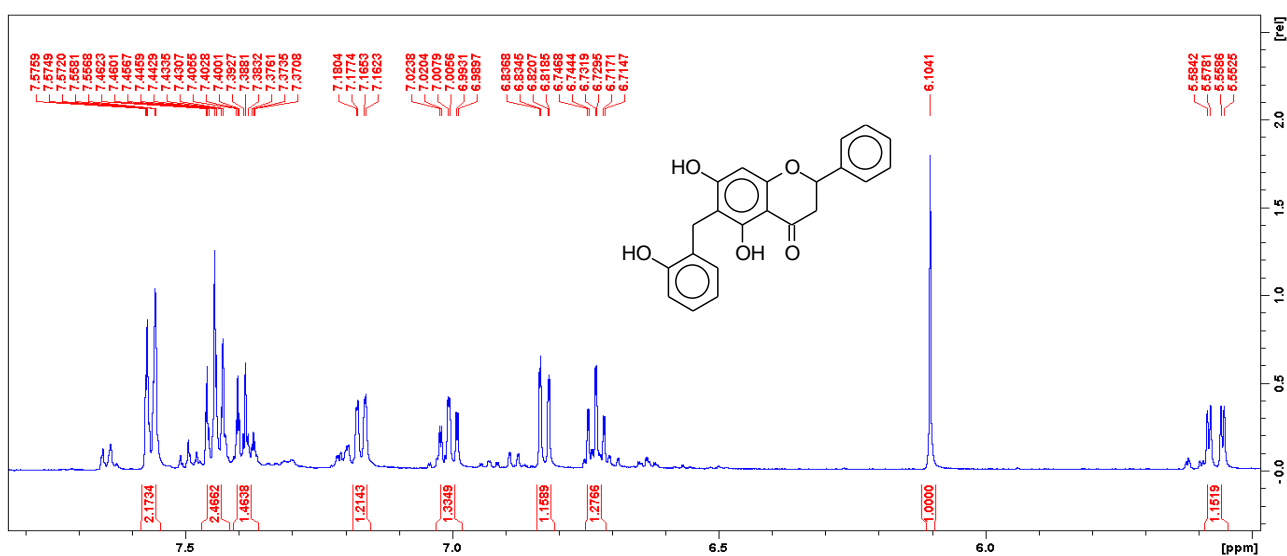

Figure S84. Expansion ( $\delta$  7.82 – 7.49) of the  $^1\text{H}$  NMR spectrum of isochamanetin (10) in acetone- $d_6$  at 500 MHz.

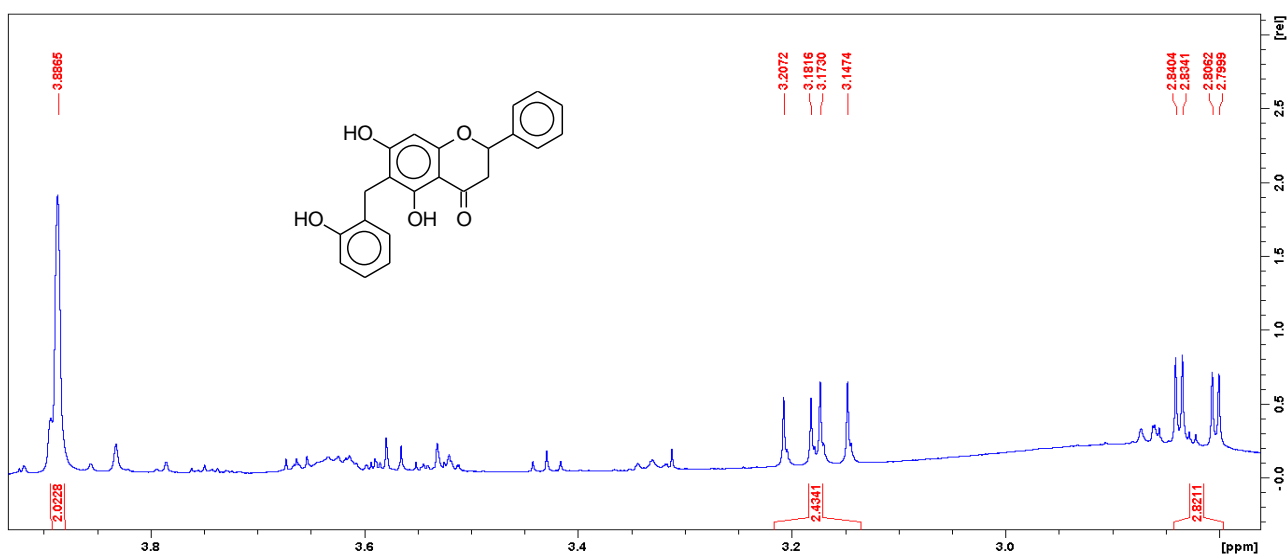

Figure S85. Expansion ( $\delta$  3.92 – 2.76) of the  $^1\text{H}$  NMR spectrum of isochamanetin (10) in acetone- $d_6$  at 500 MHz.



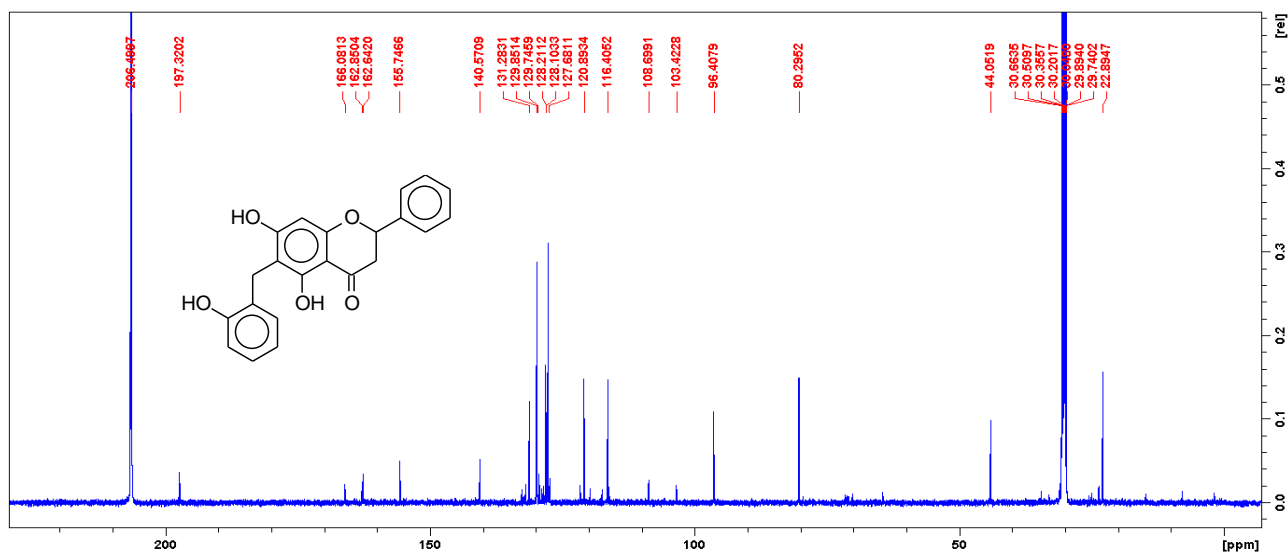

**Figure S86.**  $^{13}\text{C}$  NMR spectrum of *isochamanetin* (**10**) in acetone- $d_6$  at 125 MHz.

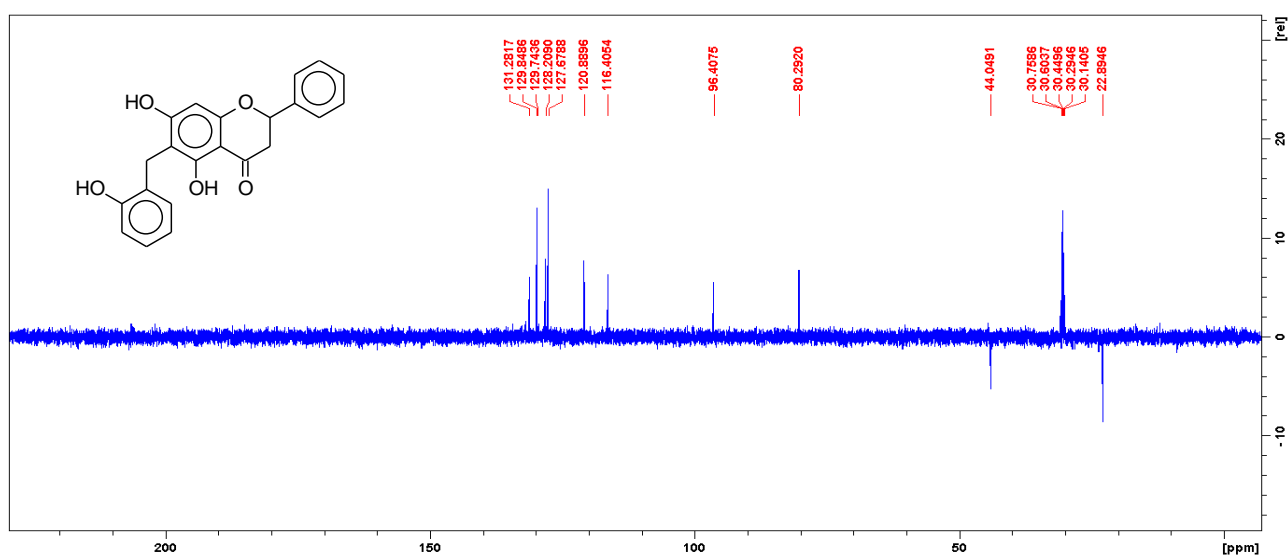

**Figure S87.** DEPT 135 spectrum of *isochamanetin* (**10**) in acetone- $d_6$  at 125 MHz.

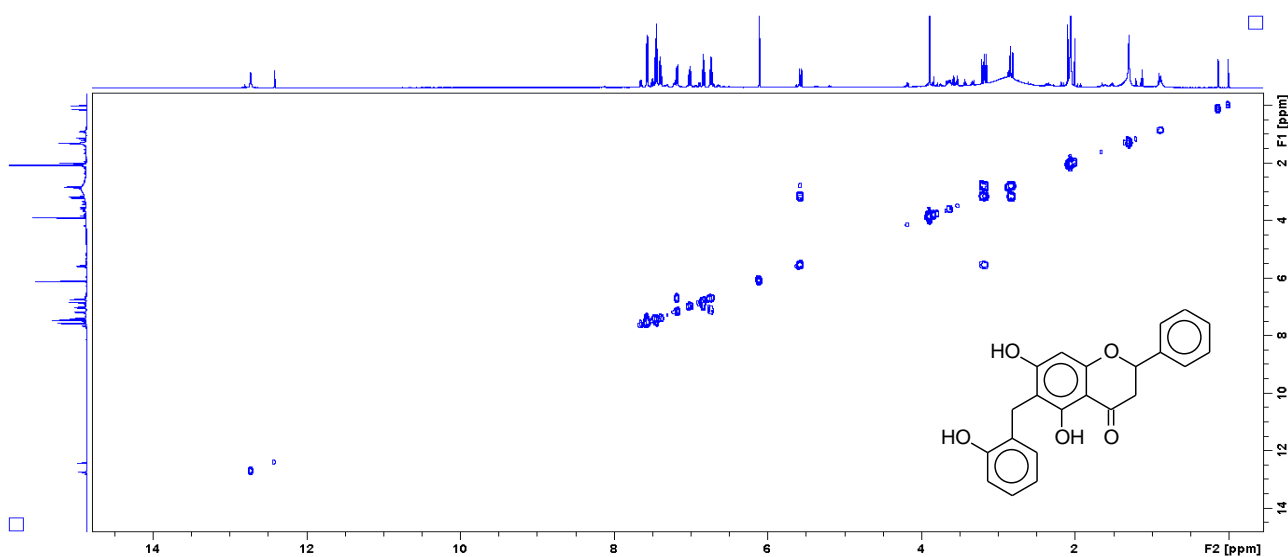

**Figure S88.**  $^1\text{H}$ - $^1\text{H}$  correlation map from COSY NMR experiment of *isochamanetin* (**10**) in acetone- $d_6$  at 500 MHz.

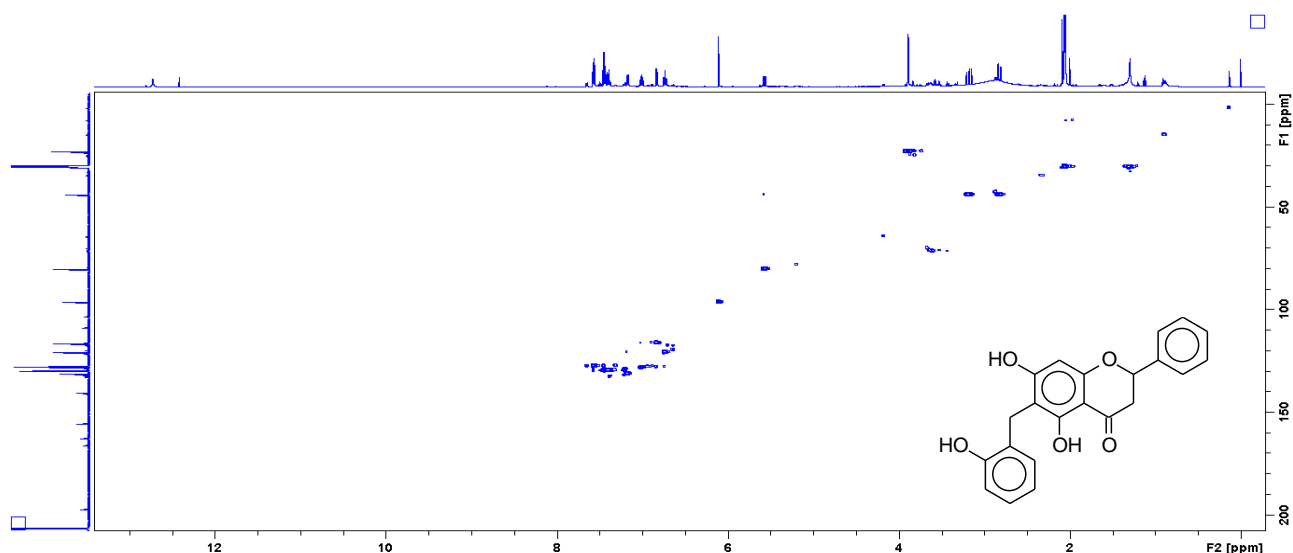

**Figure S89.** One-bond  $^1\text{H}$ - $^{13}\text{C}$  correlation map from HSQC NMR experiment of **isochamanetin (10)** in acetone- $d_6$  at 500 ( $^1\text{H}$ ) and 125 MHz ( $^{13}\text{C}$ ), respectively.

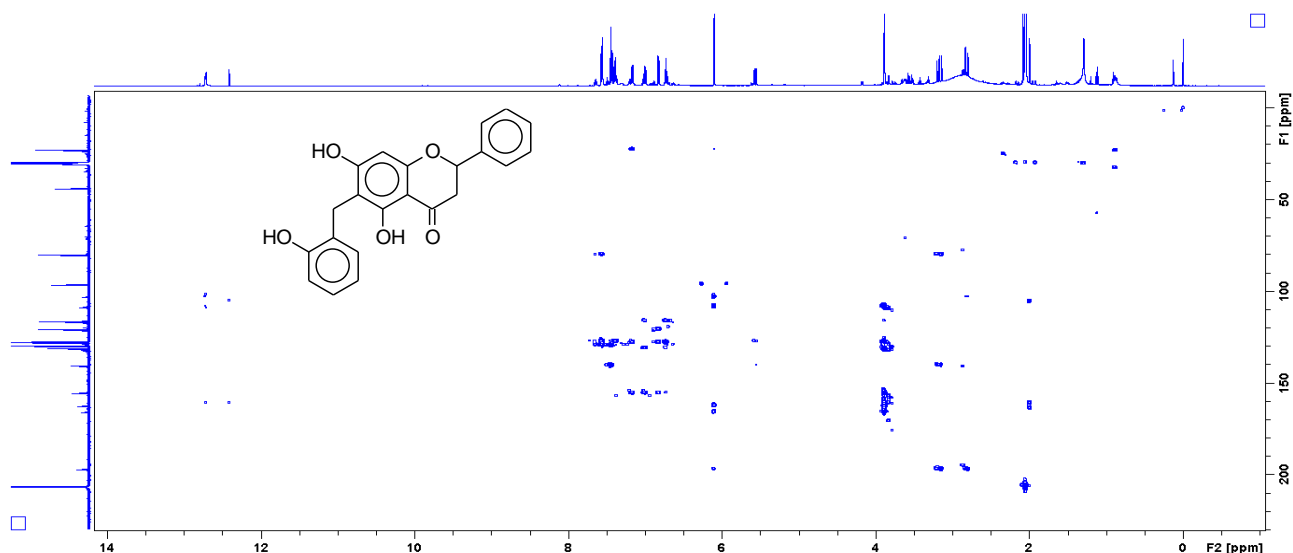

**Figure S90.** Long-range  $^1\text{H}$ - $^{13}\text{C}$  correlation map from HMBC NMR experiment of **isochamanetin (10)** in acetone- $d_6$  at 500 ( $^1\text{H}$ ) and 125 MHz ( $^{13}\text{C}$ ), respectively.

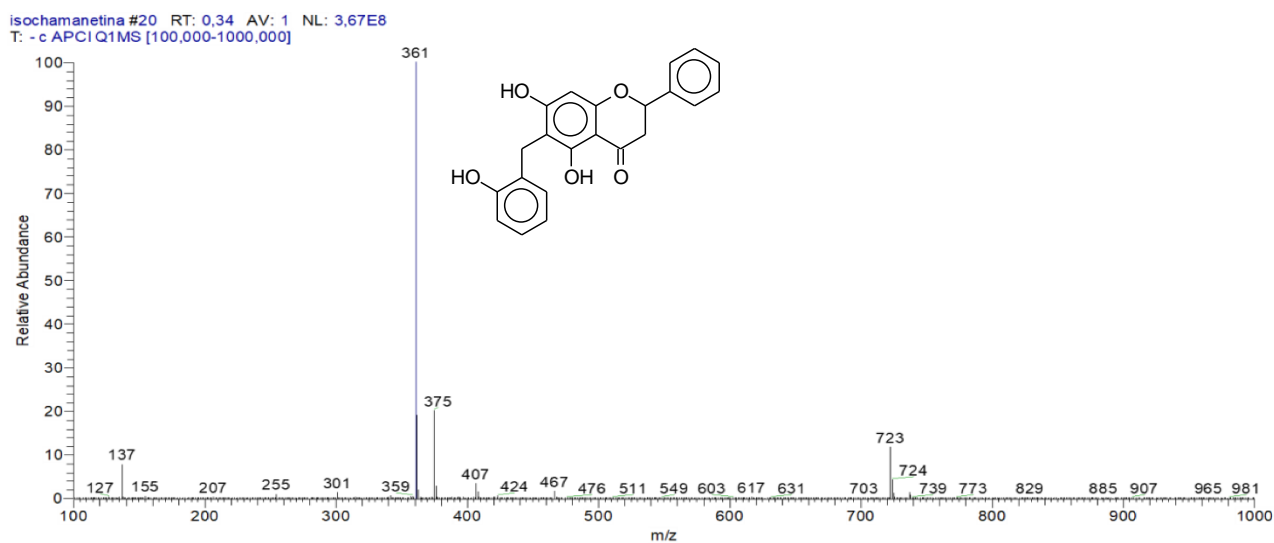

**Figure S91.** LR-APCI(-)-MS spectrum of **isochamanetin (10)** ( $m/z$  361 [ $M-H$ ] $^-$ ).

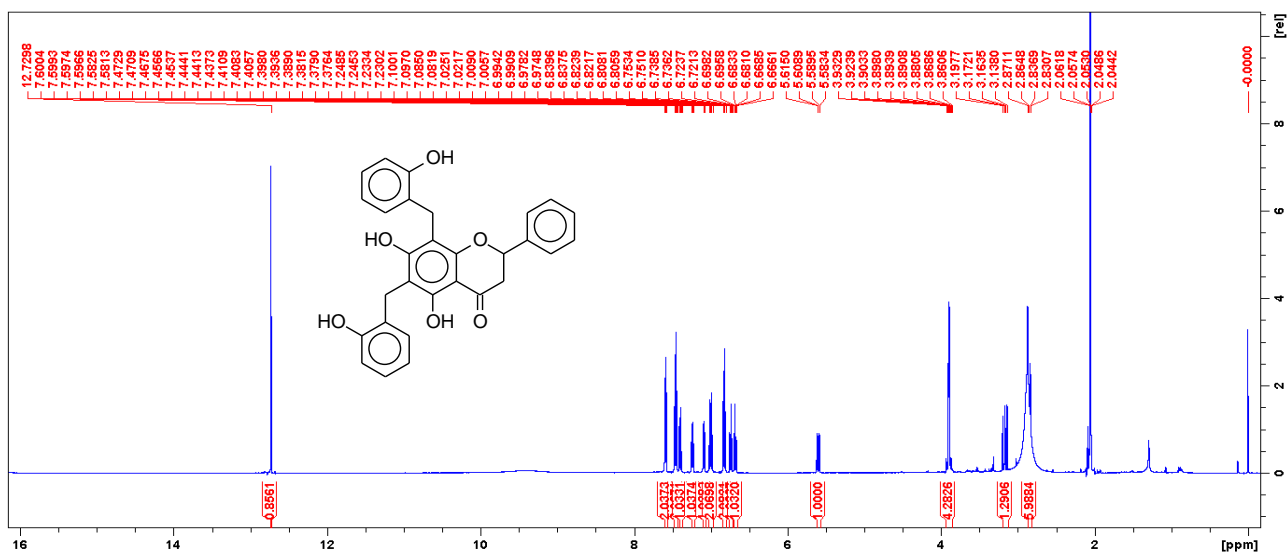

Figure S92.  $^1\text{H}$  NMR spectrum of dichamanetin (11) in acetone- $d_6$  at 500 MHz.

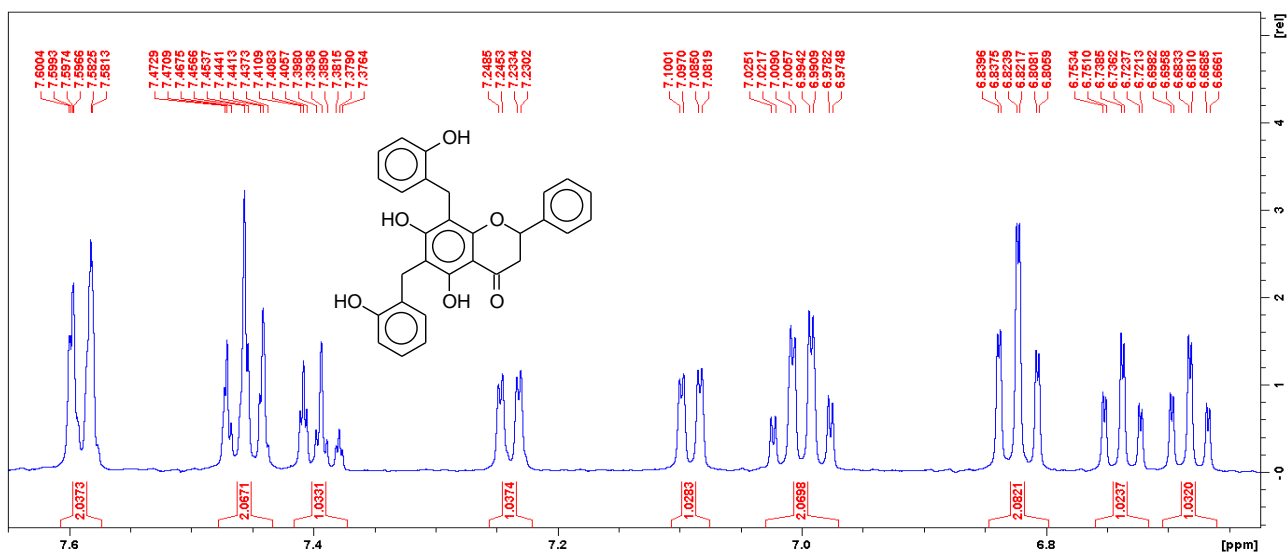

Figure S93. Expansion ( $\delta$  7.64 – 6.63) of the  $^1\text{H}$  NMR spectrum of dichamanetin (11) in acetone- $d_6$  at 500 MHz.

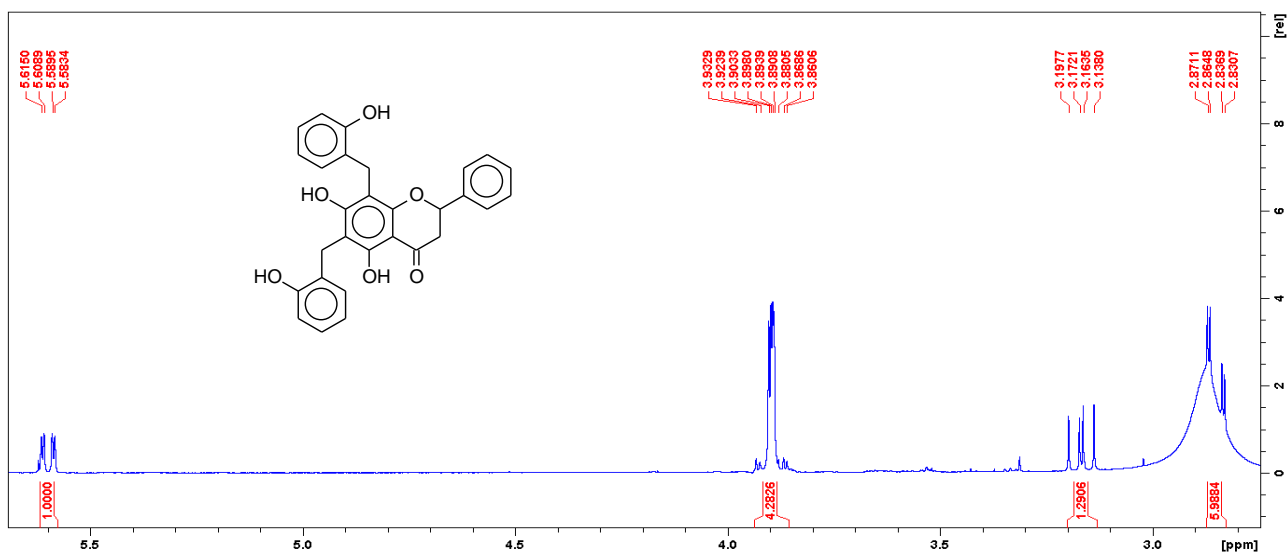

Figure S94. Expansion ( $\delta$  5.68 – 2.75) of the  $^1\text{H}$  NMR spectrum of dichamanetin (11) in acetone- $d_6$  at 500 MHz.

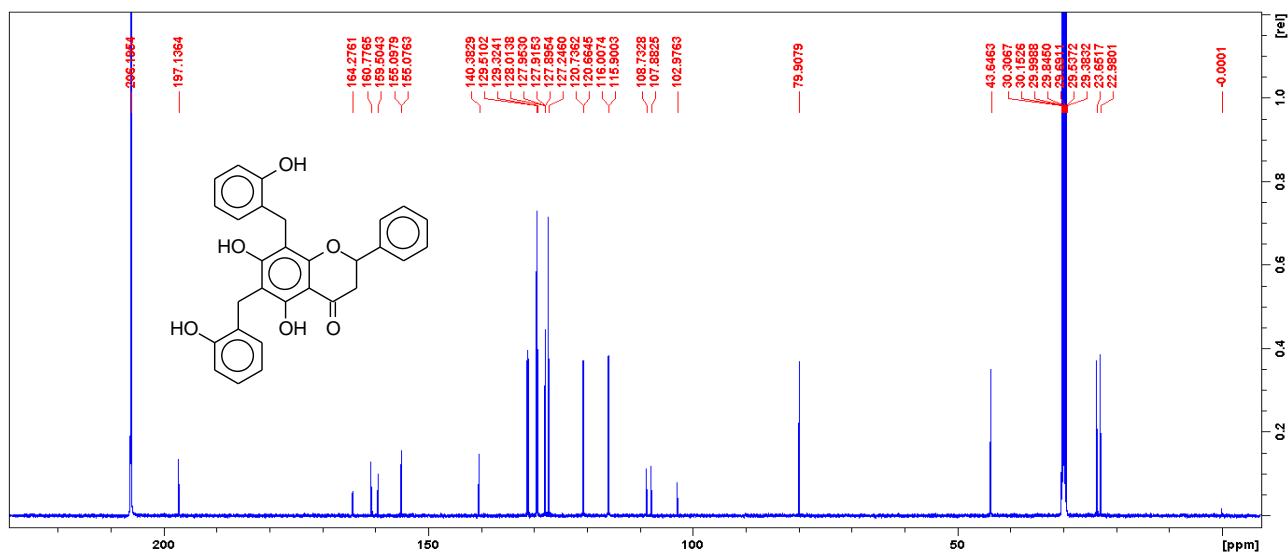

**Figure S95.**  $^{13}\text{C}$  NMR spectrum of *dichamanetin* (**11**) in acetone- $d_6$  at 125 MHz.

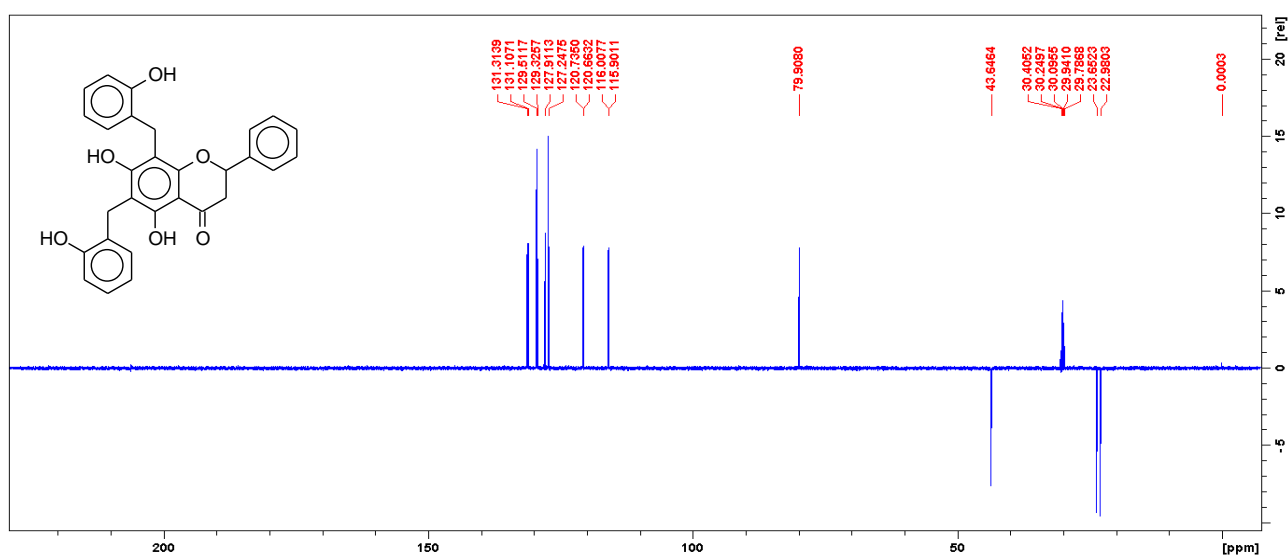

**Figure S96.** DEPT 135 spectrum of *dichamanetin* (**11**) in acetone- $d_6$  at 125 MHz.

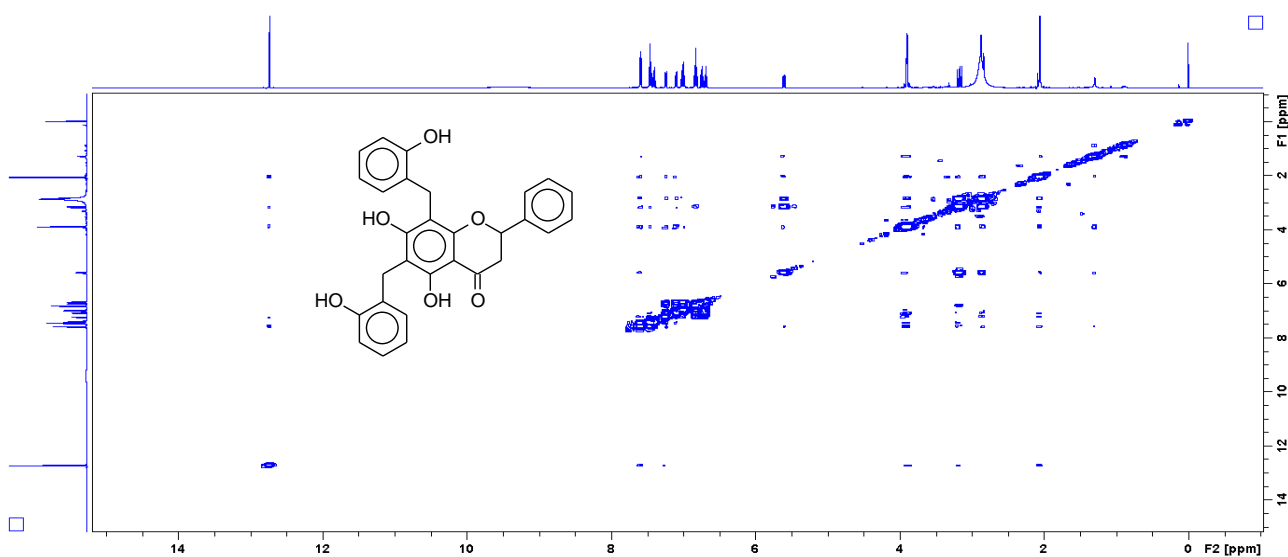

**Figure S97.**  $^1\text{H}$ - $^1\text{H}$  correlation map from COSY NMR experiment of *dichamanetin* (**11**) in acetone- $d_6$  at 500 MHz.

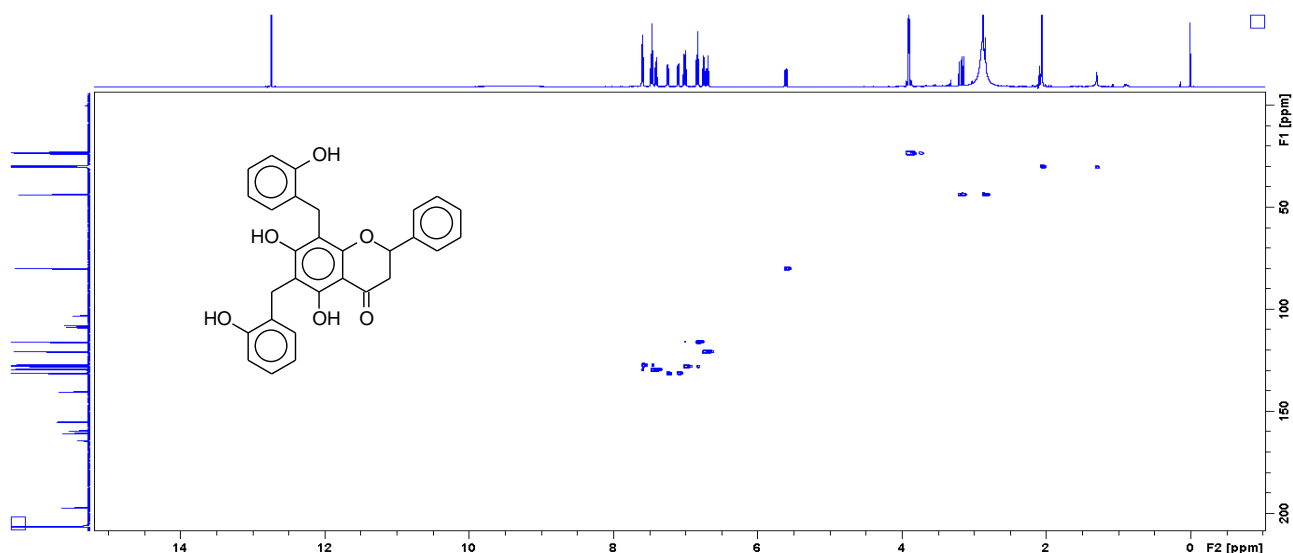

**Figure S98.** One-bond  $^1\text{H}$ - $^{13}\text{C}$  correlation map from HSQC NMR experiment of *dichamanetin* (**11**) in acetone- $d_6$  at 500 ( $^1\text{H}$ ) and 125 MHz ( $^{13}\text{C}$ ), respectively.

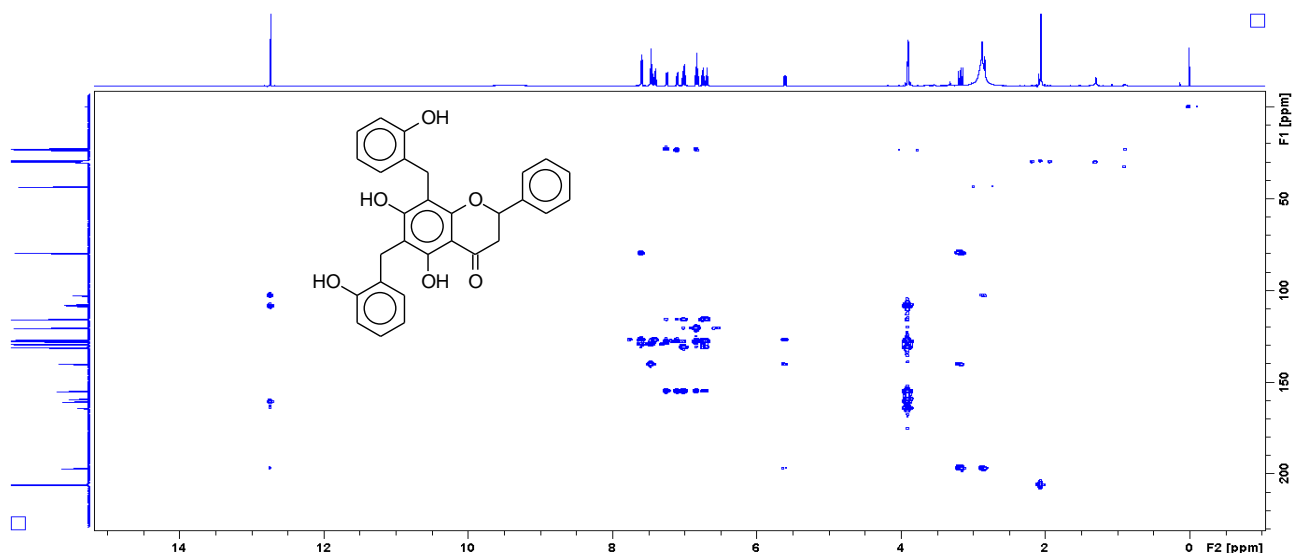

**Figure S99.** Long-range  $^1\text{H}$ - $^{13}\text{C}$  correlation map from HMBC NMR experiment of *dichamanetin* (**11**) in acetone- $d_6$  at 500 ( $^1\text{H}$ ) and 125 MHz ( $^{13}\text{C}$ ), respectively.

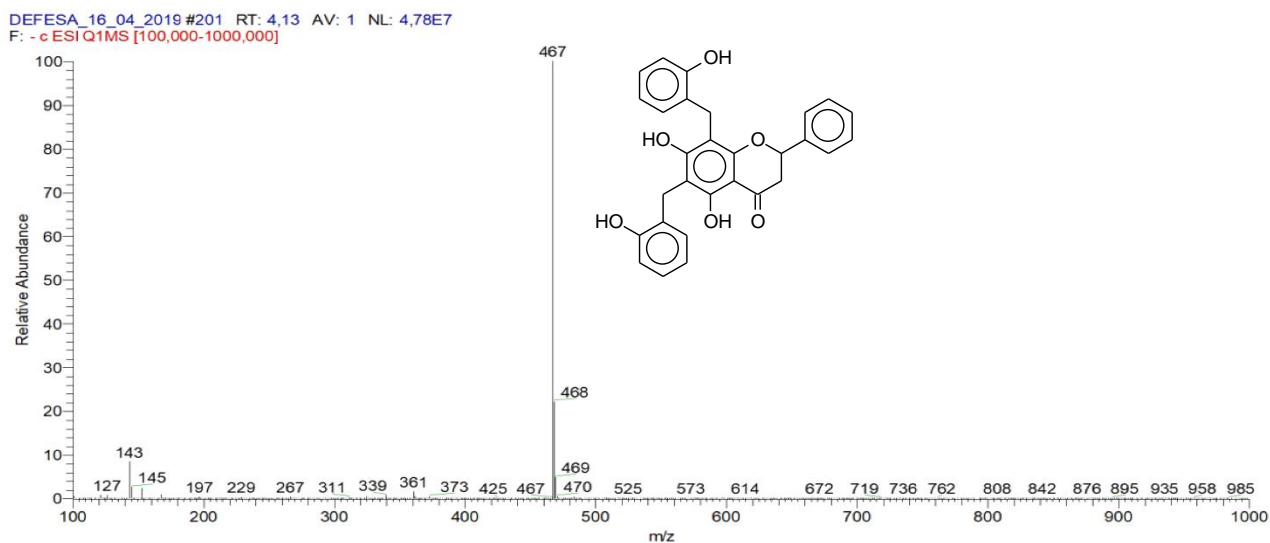

**Figure S100.** LR-ESI(-)-MS spectrum of *dichamanetin* (**11**) ( $m/z$  467 [ $\text{M}-\text{H}$ ] $^-$ ).

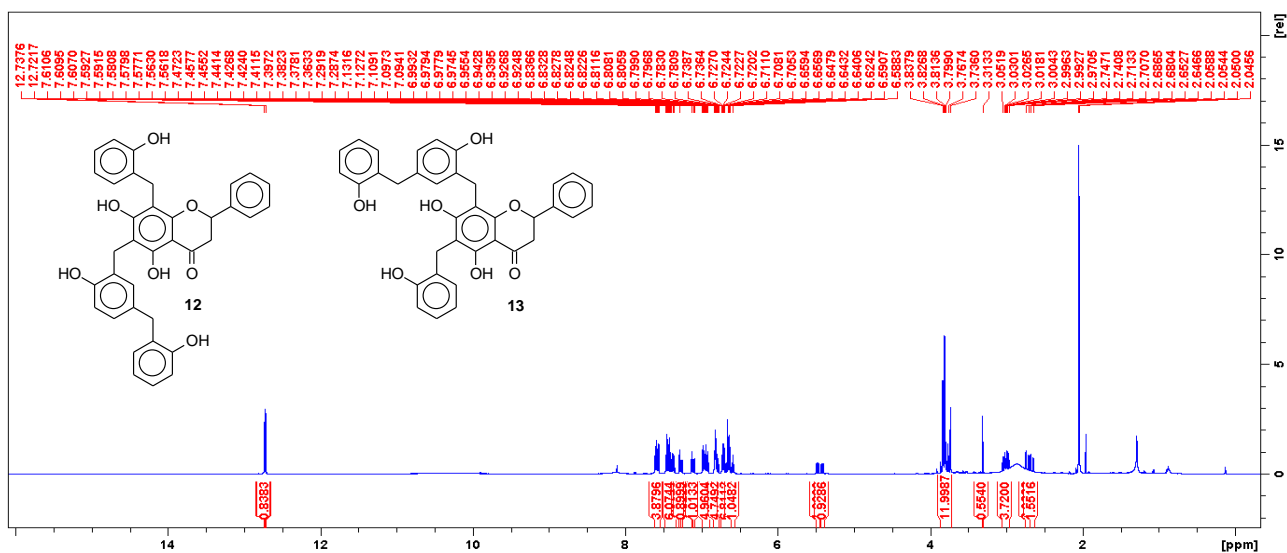

**Figure S101.**  $^1\text{H}$  NMR spectrum of the mixture of **uvarinol** (12) and **isouvarinol** (13) in acetone- $d_6$  at 500 MHz.

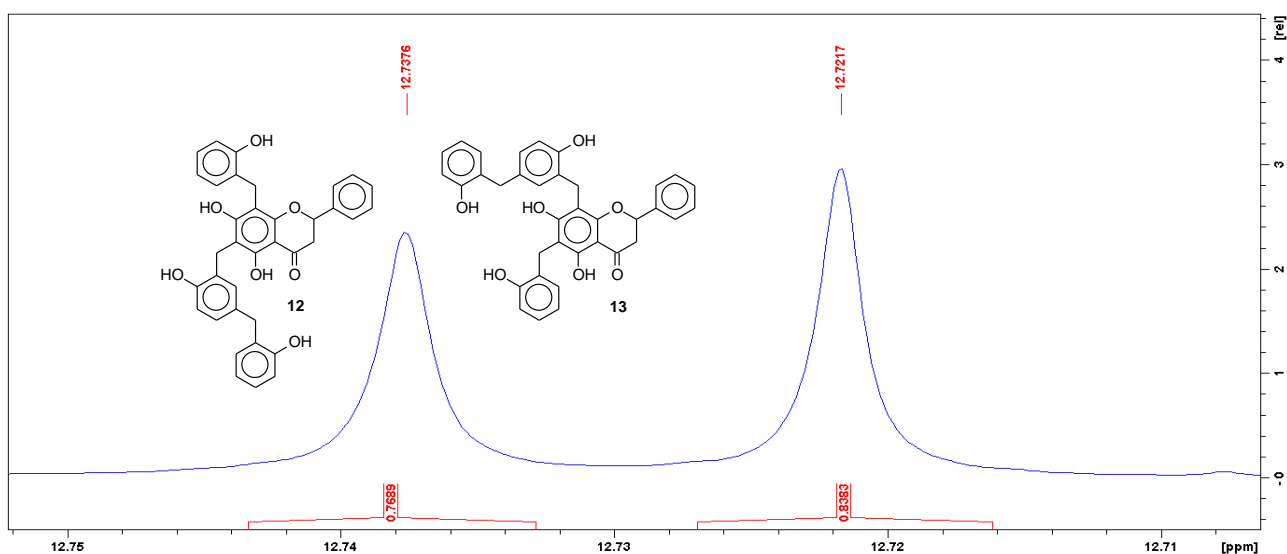

**Figure S102.** Expansion ( $\delta$  12.75 – 12.70) of the  $^1\text{H}$  NMR spectrum of the mixture of **uvarinol** (12) and **isouvarinol** (13) in acetone- $d_6$  at 500 MHz.

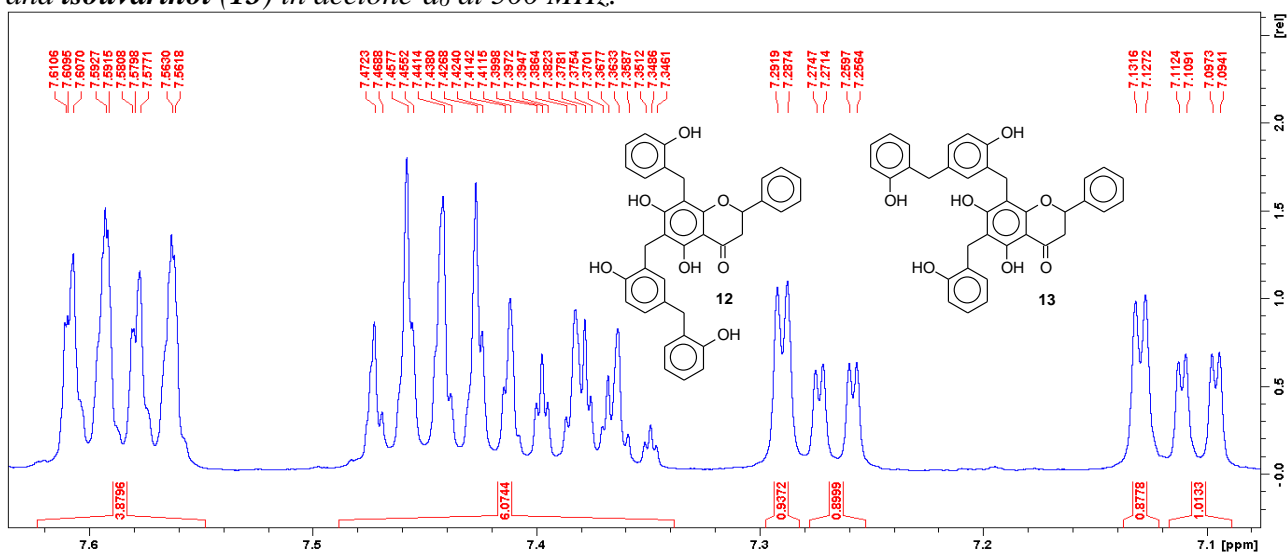

**Figure S103.** Expansion ( $\delta$  7.63 – 7.07) of the  $^1\text{H}$  NMR spectrum of the mixture of **uvarinol** (12) and **isouvarinol** (13) in acetone- $d_6$  at 500 MHz.

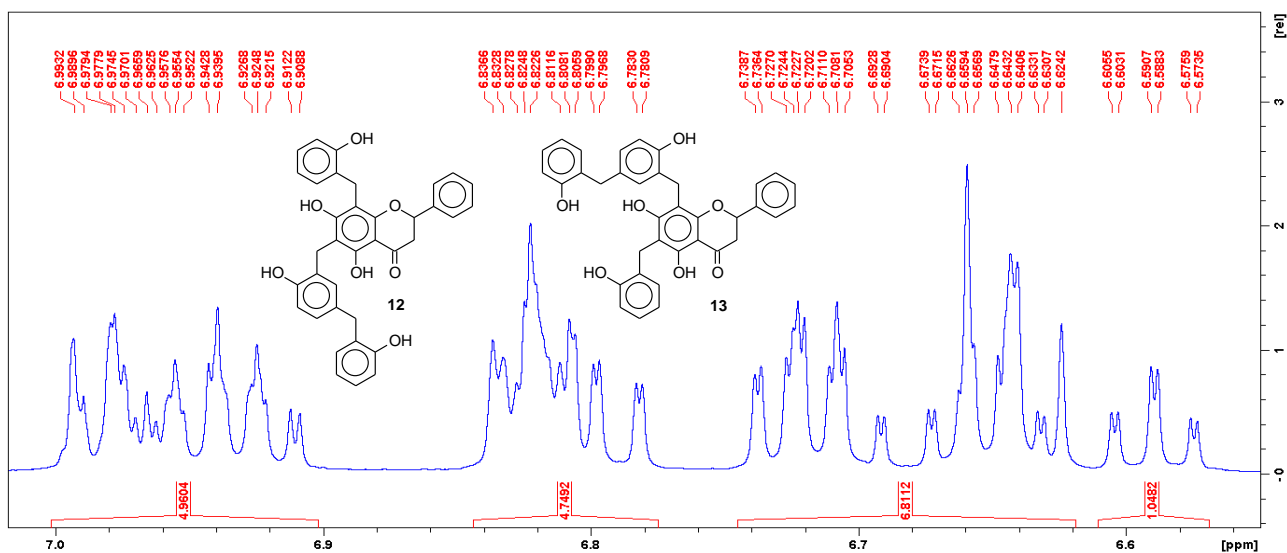

**Figure S104.** Expansion ( $\delta$  7.01 – 6.55) of the  $^1\text{H}$  NMR spectrum of the mixture of **uvarinol** (**12**) and **isouvarinol** (**13**) in acetone- $d_6$  at 500 MHz.

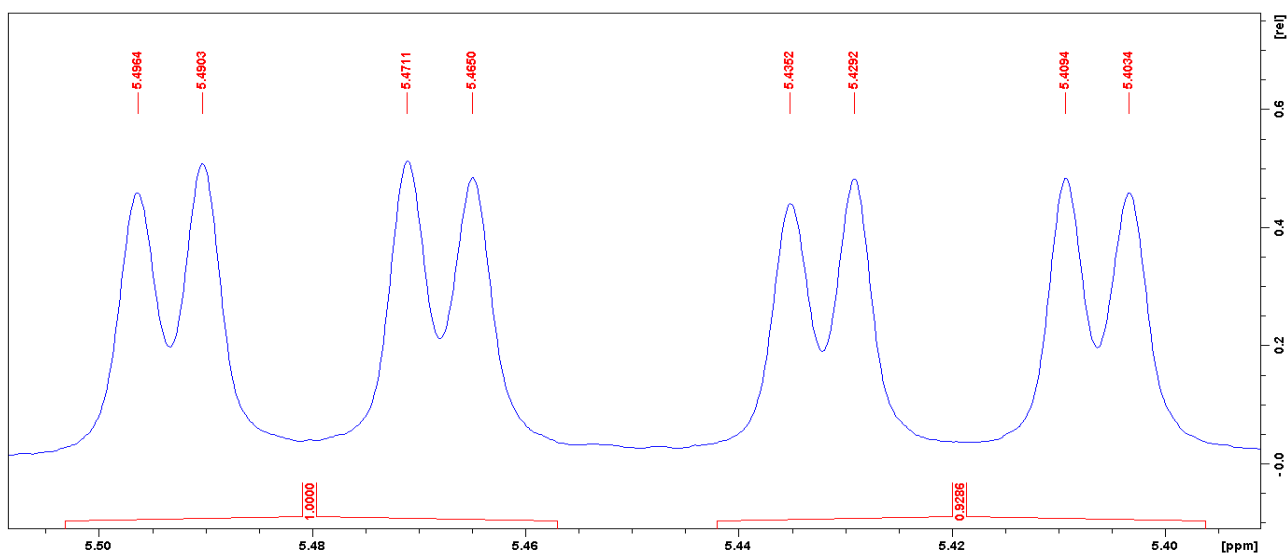

**Figure S105.** Expansion ( $\delta$  5.50 – 5.39) of the  $^1\text{H}$  NMR spectrum of the mixture of **uvarinol** (**12**) and **isouvarinol** (**13**) in acetone- $d_6$  at 500 MHz.

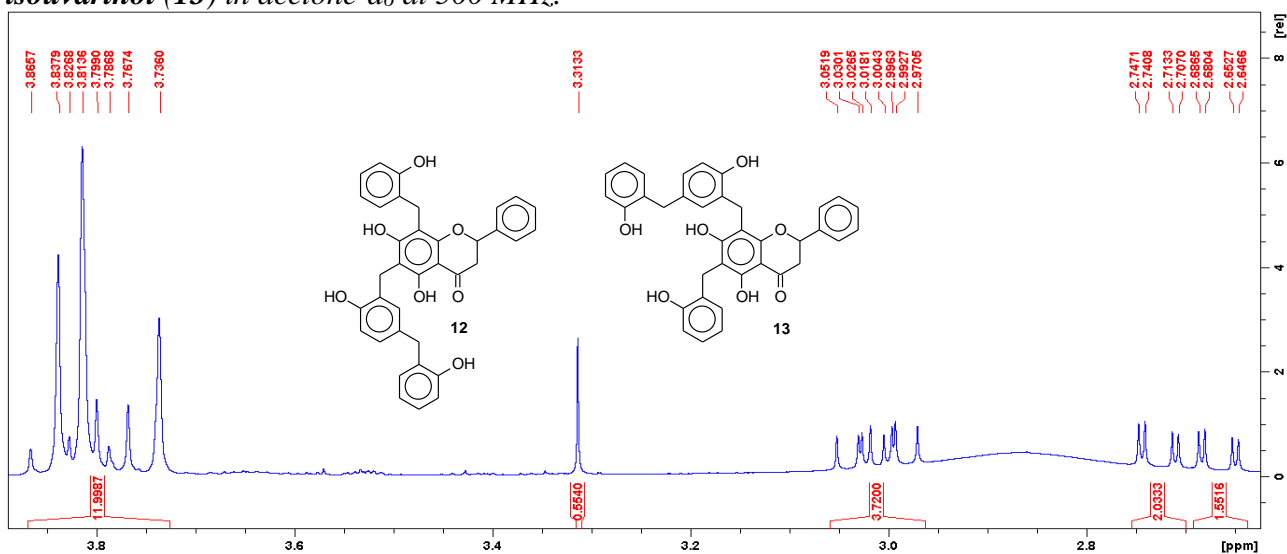

**Figure S106.** Expansion ( $\delta$  5.50 – 5.39) of the  $^1\text{H}$  NMR spectrum of the mixture of **uvarinol** (**12**) and **isouvarinol** (**13**) in acetone- $d_6$  at 500 MHz.

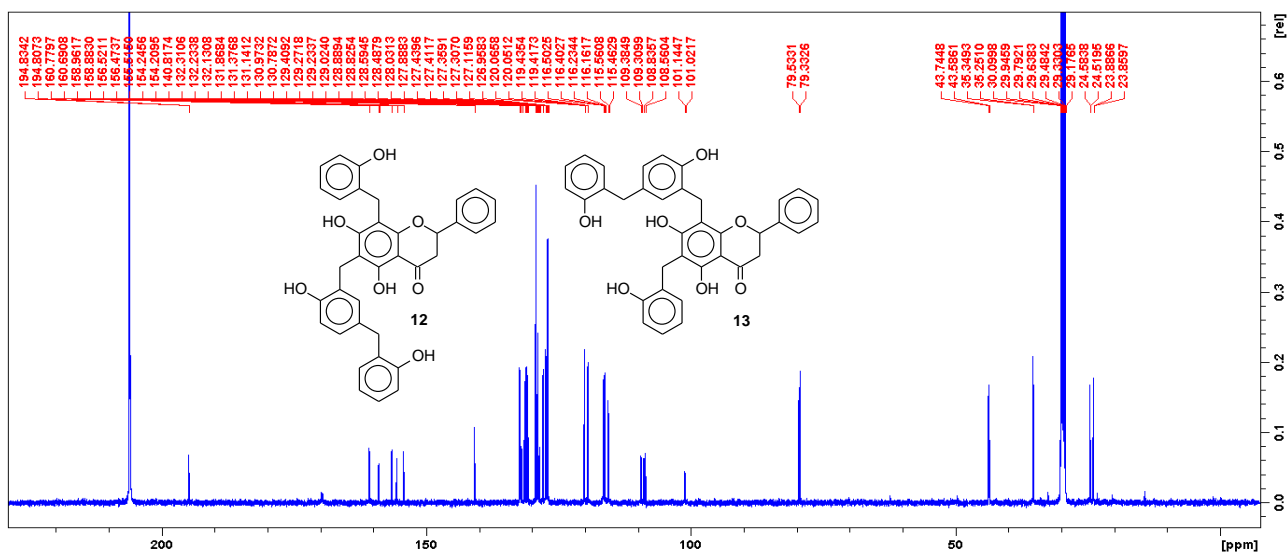

**Figure S107.**  $^{13}\text{C}$  NMR spectrum of the mixture of uvarinol (12) and isouvarinol (13) in acetone- $d_6$  at 125 MHz.

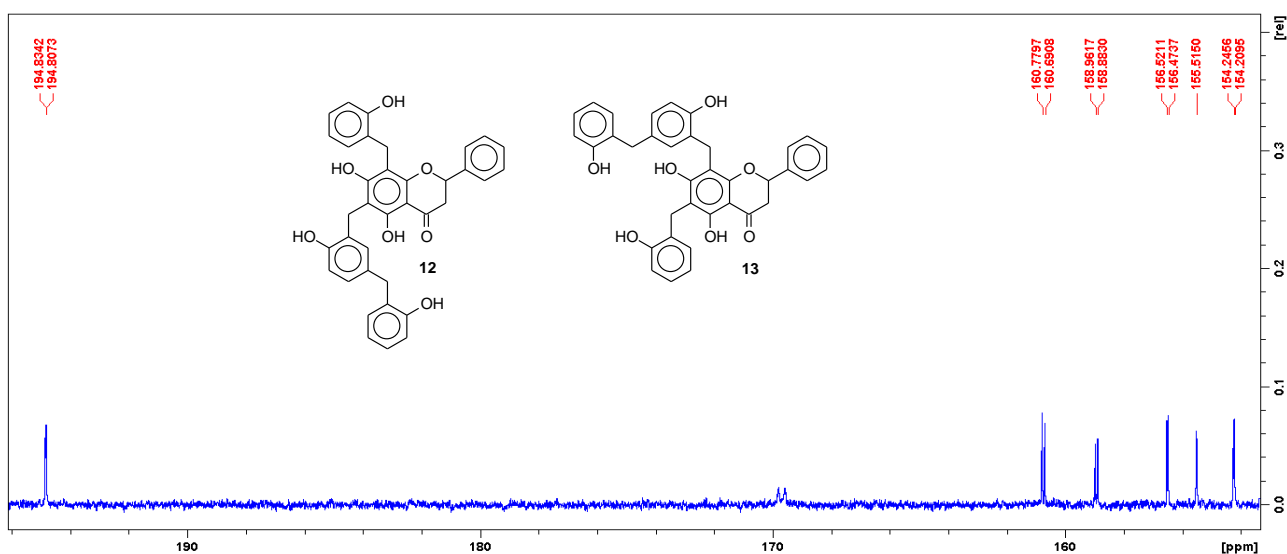

**Figure S108.** Expansion ( $\delta$  196.0 – 153.4) of the  $^{13}\text{C}$  NMR spectrum of the mixture of uvarinol (12) and isouvarinol (13) in acetone- $d_6$  at 125 MHz.

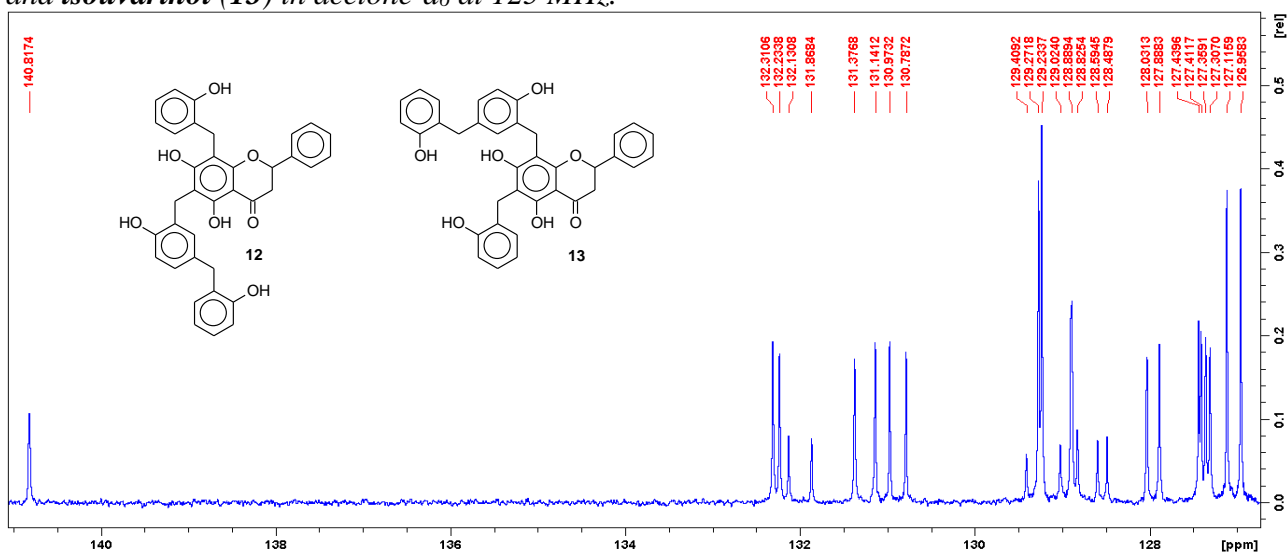

**Figure S109.** Expansion ( $\delta$  141.0 – 126.7) of the  $^{13}\text{C}$  NMR spectrum of the mixture of uvarinol (12) and isouvarinol (13) in acetone- $d_6$  at 125 MHz.



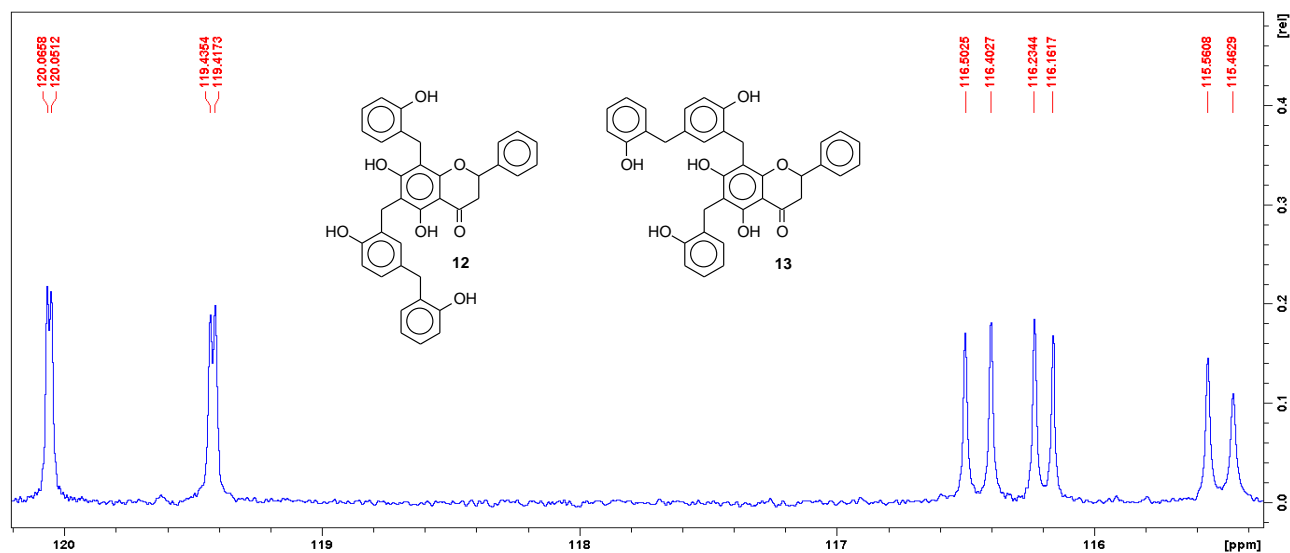

**Figure S110.** Expansion ( $\delta$  120.1 – 115.3) of the  $^{13}\text{C}$  NMR spectrum of the mixture of **uvarinol** (**12**) and **isouvarinol** (**13**) in acetone- $d_6$  at 125 MHz.

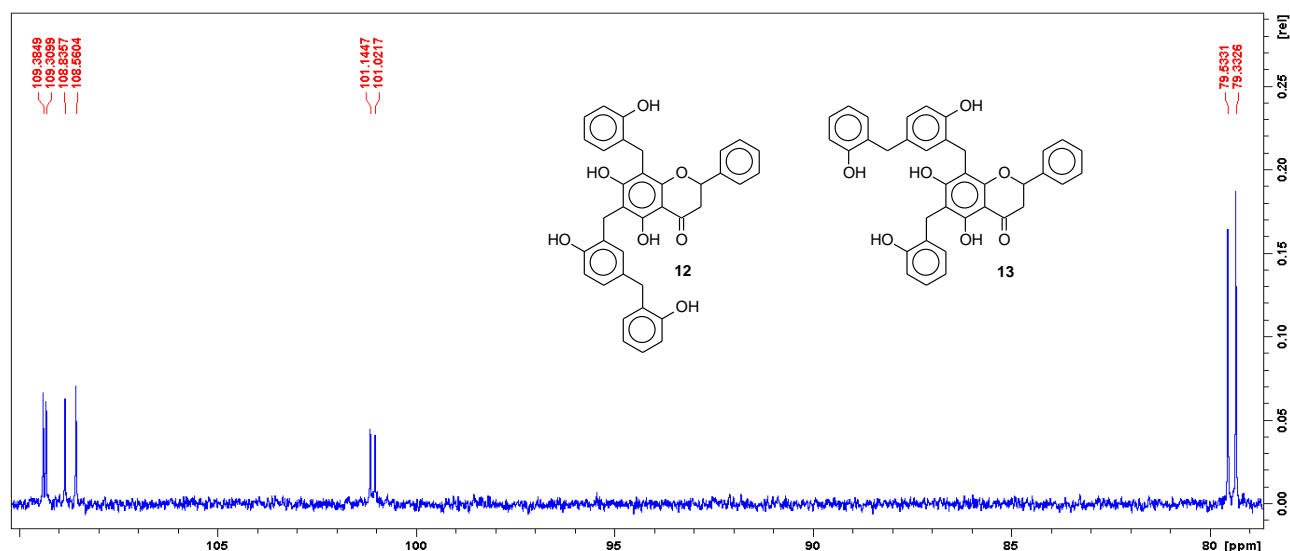

**Figure S111.** Expansion ( $\delta$  110.1 – 78.7) of the  $^{13}\text{C}$  NMR spectrum of the mixture of **uvarinol** (**12**) and **isouvarinol** (**13**) in acetone- $d_6$  at 125 MHz.

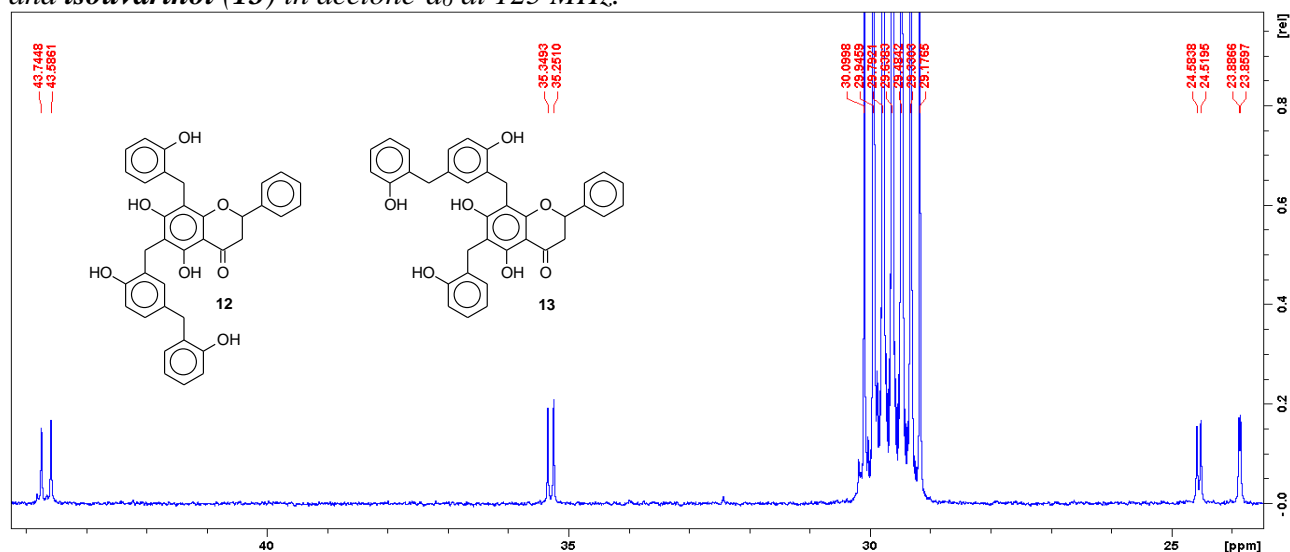

**Figure S112.** Expansion ( $\delta$  44.2 – 23.5) of the  $^{13}\text{C}$  NMR spectrum of the mixture of **uvarinol** (**12**) and **isouvarinol** (**13**) in acetone- $d_6$  at 125 MHz.

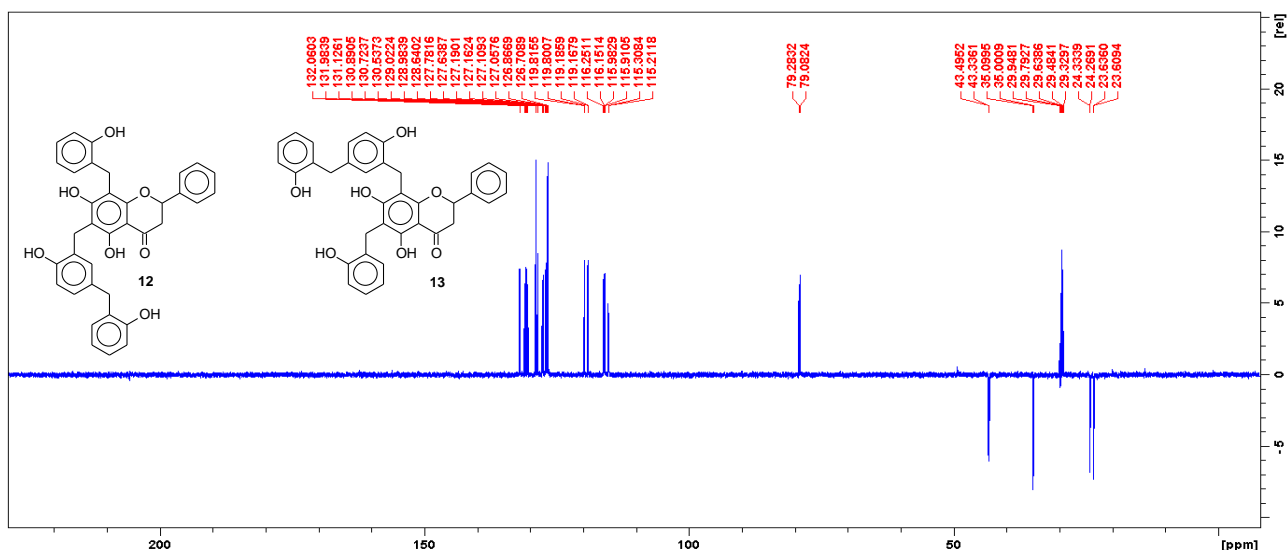

**Figure S113.** DEPT 135 spectrum of the mixture of **uvarinol** (**12**) and **isouvarinol** (**13**) in acetone- $d_6$  at 125 MHz.

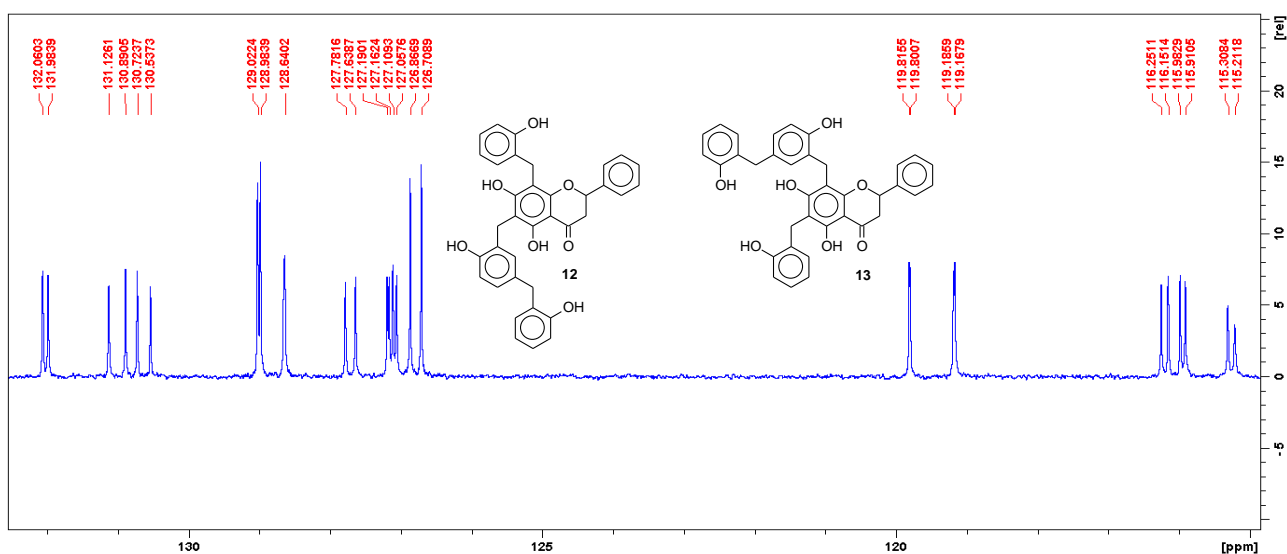

**Figure S114.** Expansion ( $\delta$  132.4 – 114.9) of the DEPT 135 spectrum of the mixture of **uvarinol** (**12**) and **isouvarinol** (**13**) in acetone- $d_6$  at 125 MHz.

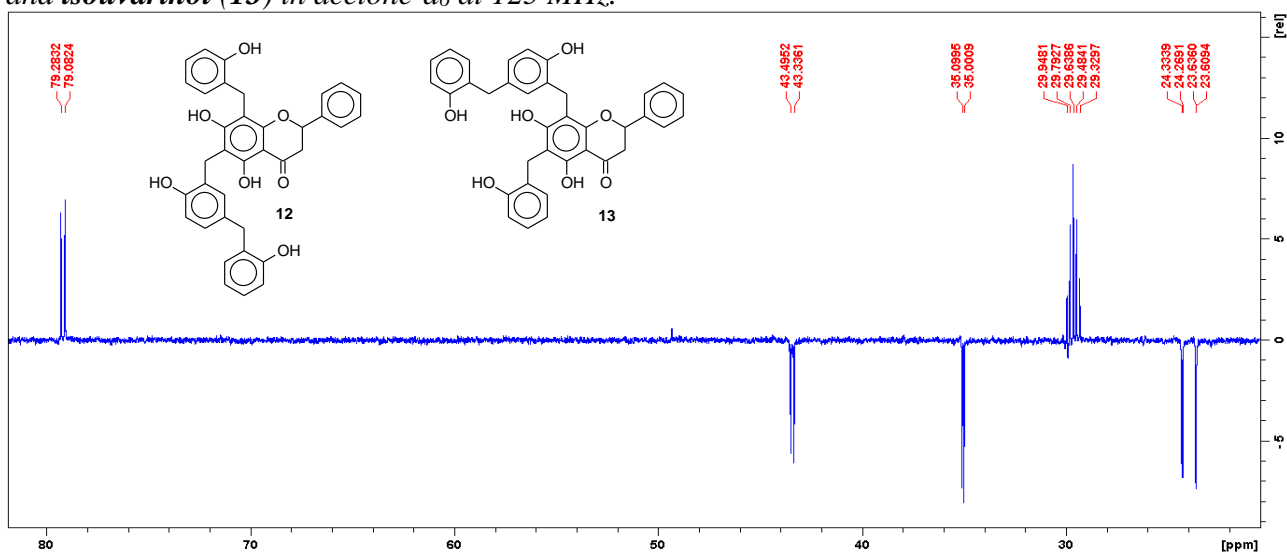

**Figure S115.** Expansion ( $\delta$  81.7 – 20.7) of the DEPT 135 spectrum of the mixture of **uvarinol** (**12**) and **isouvarinol** (**13**) in acetone- $d_6$  at 125 MHz.

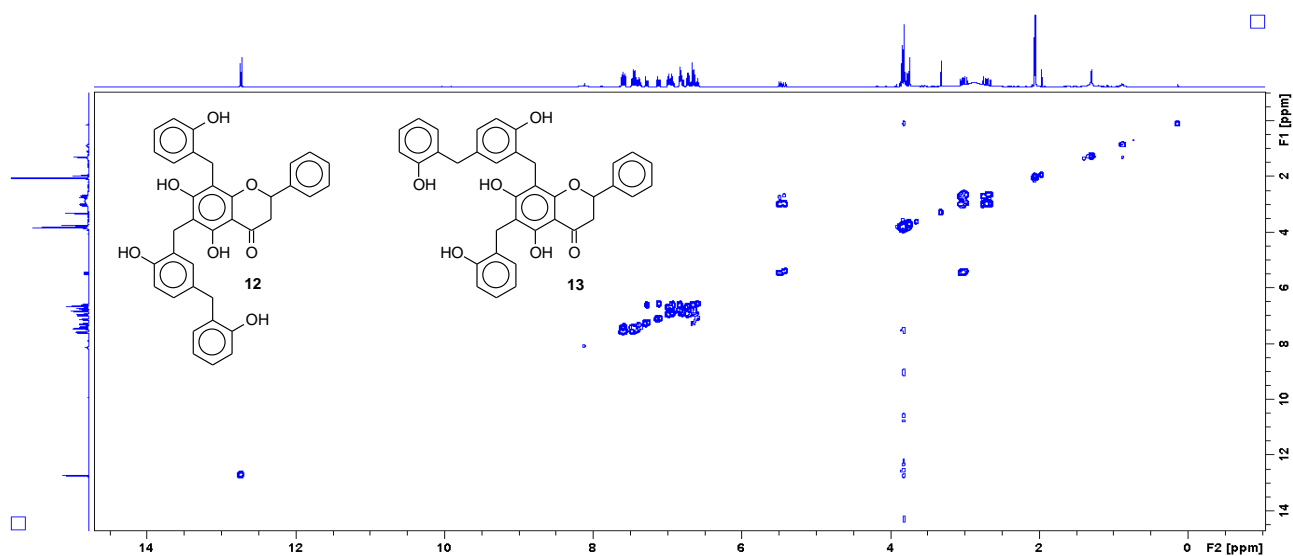

**Figure S116.**  $^1\text{H}$ - $^1\text{H}$  correlation map from COSY NMR experiment of the mixture of *uvarinol* (12) and *isouvarinol* (13) in acetone- $d_6$  at 500 MHz.

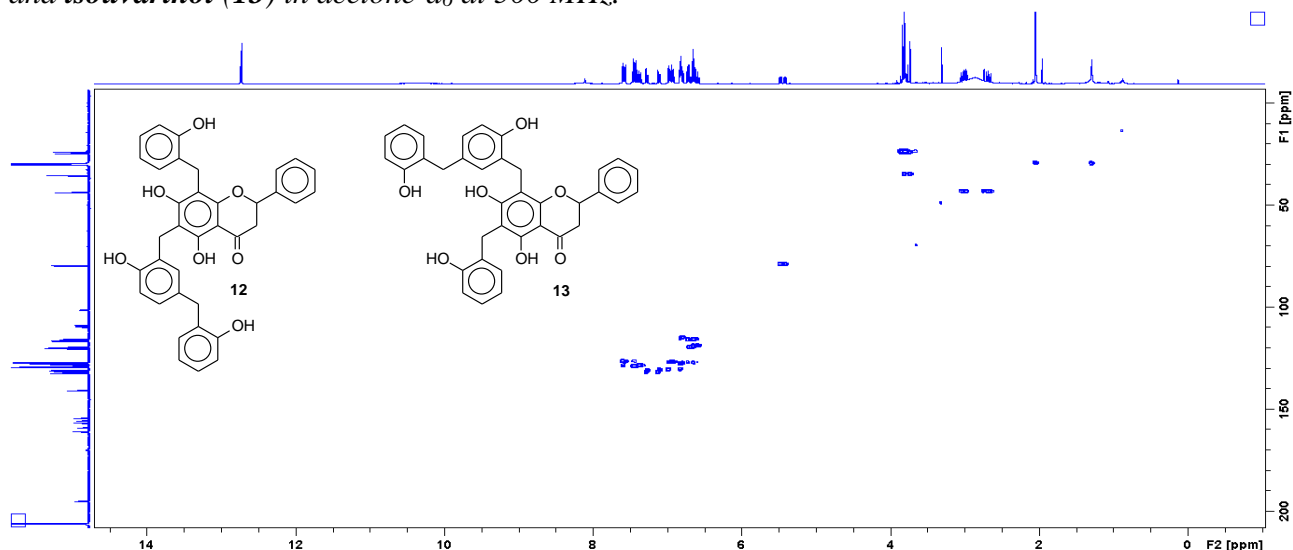

**Figure S117.** One-bond  $^1\text{H}$ - $^{13}\text{C}$  correlation map from HSQC NMR experiment of the mixture of *uvarinol* (12) and *isouvarinol* (13) in acetone- $d_6$  at 500 ( $^1\text{H}$ ) and 125 MHz ( $^{13}\text{C}$ ), respectively.

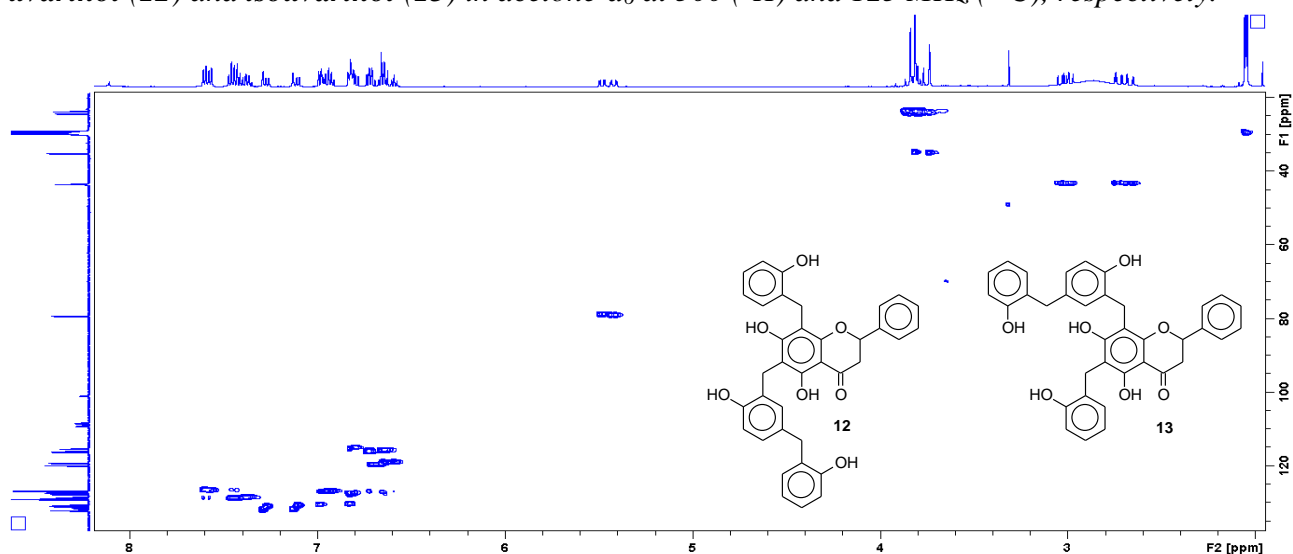

**Figure S118.** Expansion of the one-bond  $^1\text{H}$ - $^{13}\text{C}$  correlation map from HSQC NMR experiment of the mixture of *uvarinol* (12) and *isouvarinol* (13) in acetone- $d_6$  at 500 ( $^1\text{H}$ ) and 125 MHz ( $^{13}\text{C}$ ), respectively.

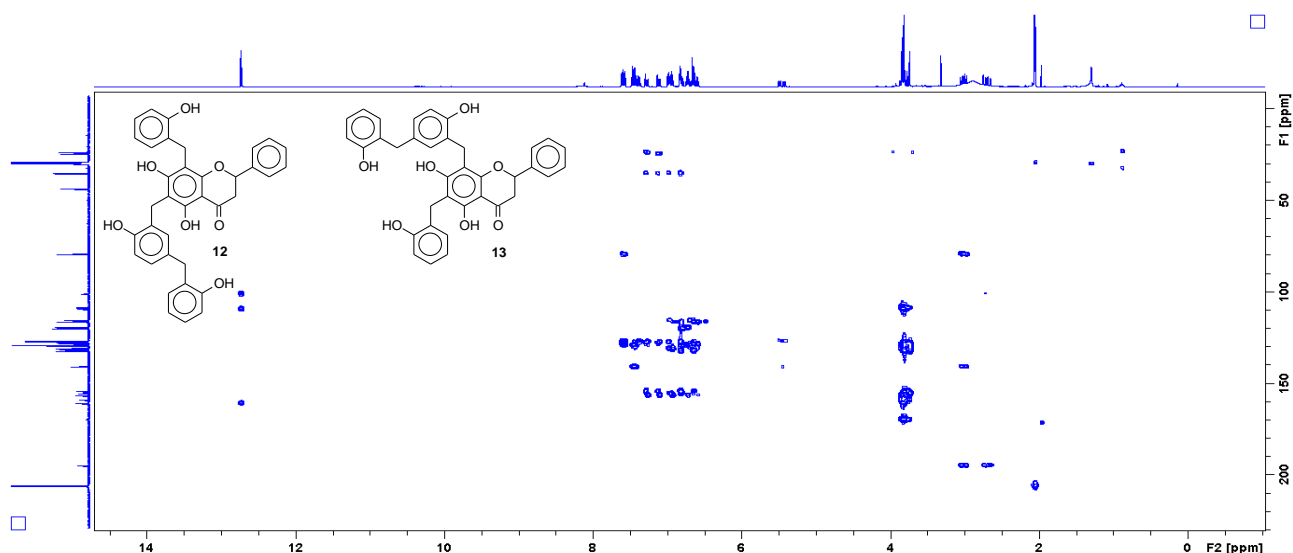

**Figure S119.** Long-range  $^1\text{H}$ - $^{13}\text{C}$  correlation map from HMBC NMR experiment of the mixture of **uvarinol** (**12**) and **isouvarinol** (**13**) in acetone- $d_6$  at 500 ( $^1\text{H}$ ) and 125 MHz ( $^{13}\text{C}$ ), respectively.

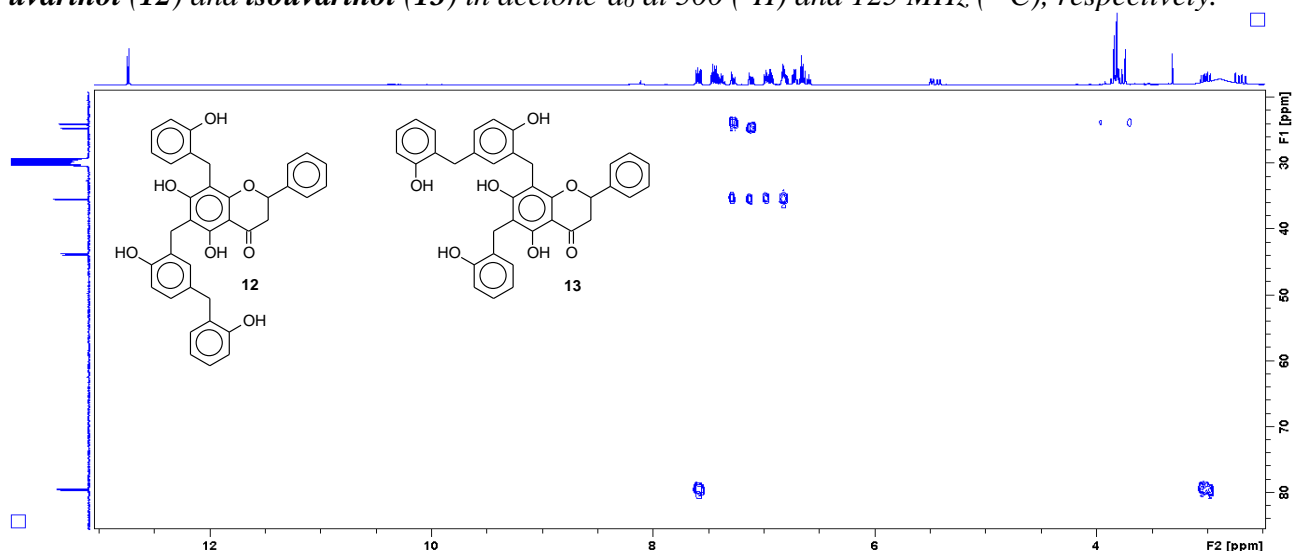

**Figure S120.** Expansion of the long-range  $^1\text{H}$ - $^{13}\text{C}$  correlation map from HMBC NMR experiment of the mixture of **uvarinol** (**12**) and **isouvarinol** (**13**) in acetone- $d_6$  at 500 ( $^1\text{H}$ ) and 125 MHz ( $^{13}\text{C}$ ), respectively.

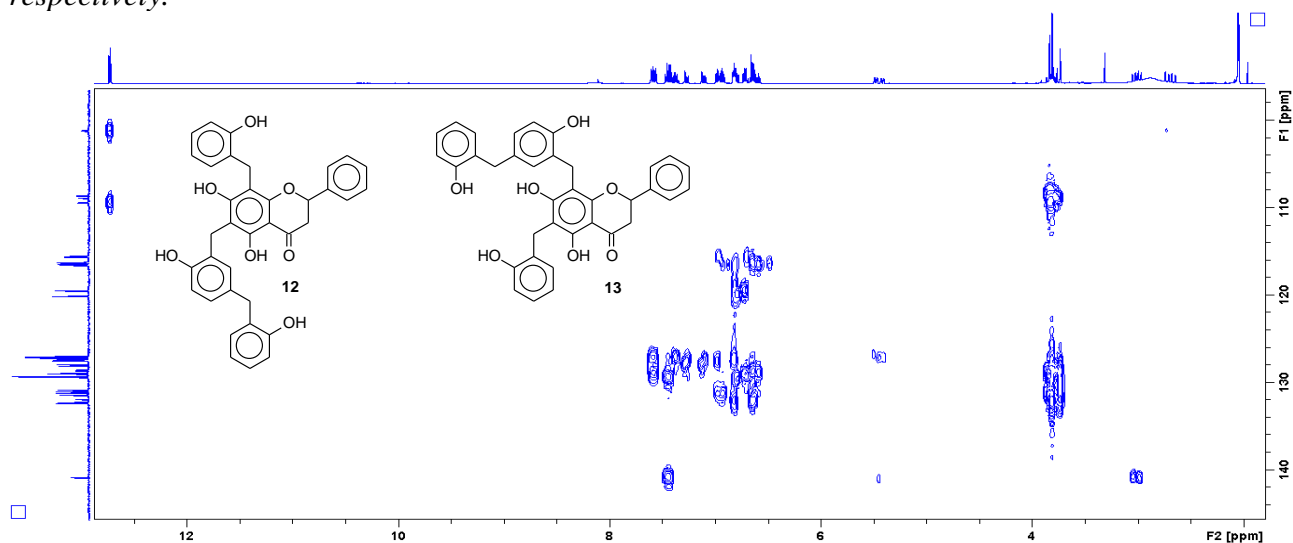

**Figure S121.** Expansion of the long-range  $^1\text{H}$ - $^{13}\text{C}$  correlation map from HMBC NMR experiment of the mixture of **uvarinol** (**12**) and **isouvarinol** (**13**) in acetone- $d_6$  at 500 ( $^1\text{H}$ ) and 125 MHz ( $^{13}\text{C}$ ), respectively.

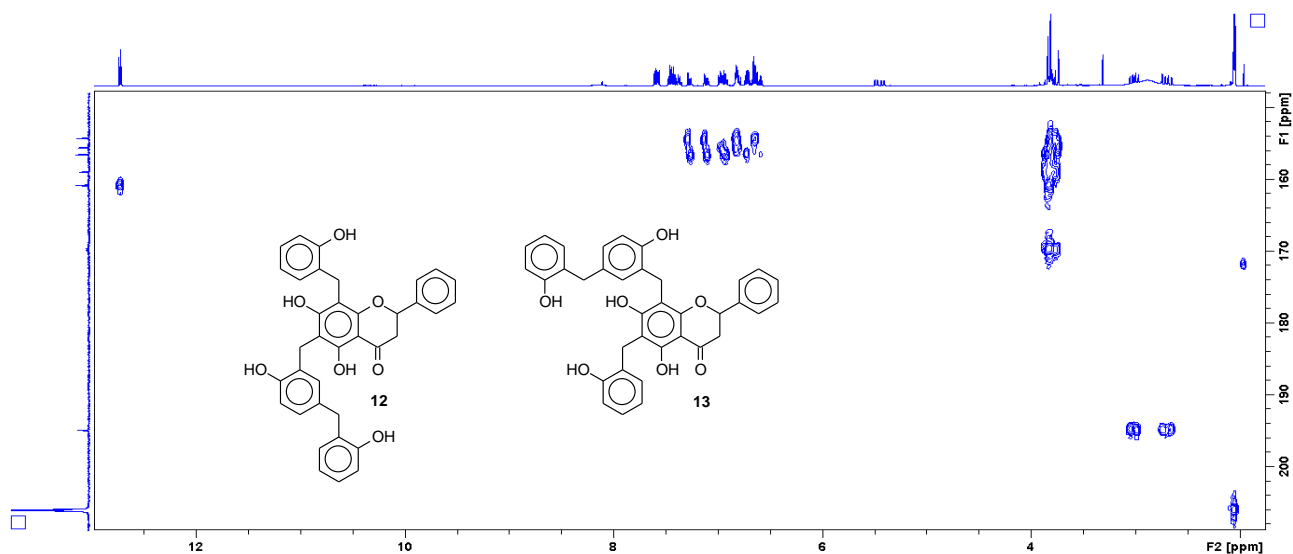

**Figure S122.** Expansion of the long-range  $^1\text{H}$ - $^{13}\text{C}$  correlation map from HMBC NMR experiment of the mixture of **uvarinol** (**12**) and **isouvarinol** (**13**) in acetone- $d_6$  at 500 ( $^1\text{H}$ ) and 125 MHz ( $^{13}\text{C}$ ), respectively.

DEFESA\_16\_04\_2019 #399 RT: 8,16 AV: 1 NL: 1,05E7  
F: -c ESI Q1MS [100,000-1000,000]

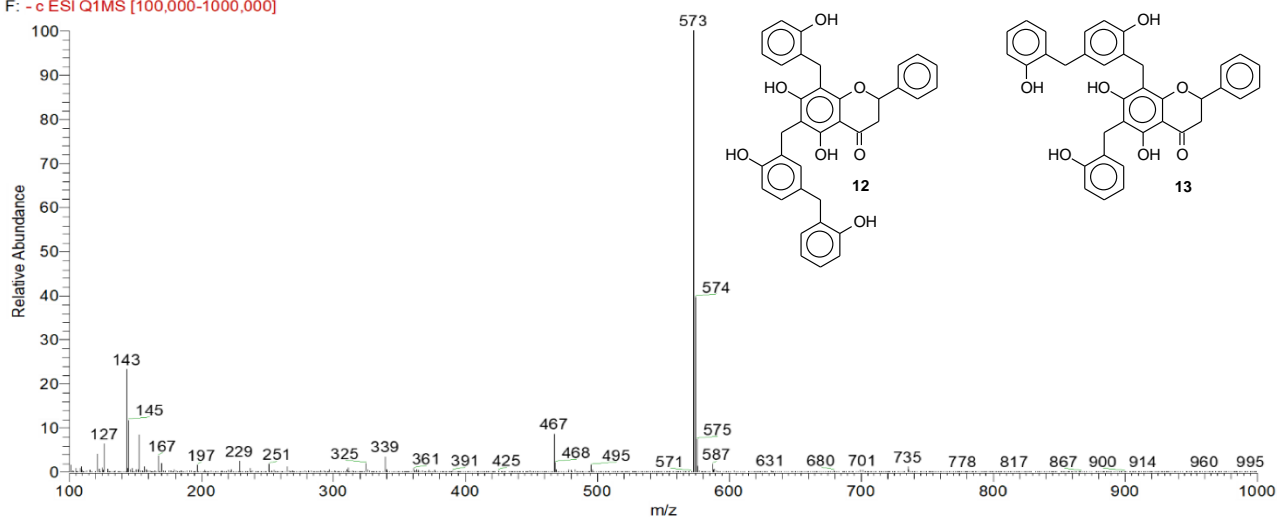

**Figure S123.** LR-ESI(-)-MS spectrum of the mixture of **uvarinol** (**12**) and **isouvarinol** (**13**) ( $m/z$  573  $[\text{M}-\text{H}]^-$ ).
